# Supplementary material
Source: HighWire-hosted journal article supplement (https://bjsm.bmj.com/content/54/7/397)
Supplement: inline-supplementary-material-3 [file inline-supplementary-material-3.xlsx]

## Sheet: SMDCS2 to OSIICS13 by IOC cats
Body part/medical system	Pathology Type	Description	SMDCS Code	OSIICS 13 code	OSIICS Diagnosis
HEAD	Brain & spinal cord injury	Concussion	HE.21.40	HN1	Concussion
HEAD	Brain & spinal cord injury	Post concussion syndrome	HE.22.40	HN1	Concussion
HEAD	Brain & spinal cord injury	Subdural / epidural hematoma	HE.23.40	HNI	Intracranial Bleed
HEAD	Brain & spinal cord injury	Structural brain injury	HE.24.40	HN2	Concussion/ Brain Injury
HEAD	Fracture	Teeth fracture	HE.32.13	HFD	Fractured Tooth
HEAD	Bone contusion	Nasal contusion	HE.32.24	HVN	Nose contusion/haematoma
HEAD	Fracture	Facial fracture	HE.33.13	HFX	Head/ Facial fracture
HEAD	Fracture	Skull fracture	HE.34.13	HFS	Skull/cranial fracture
HEAD	Fracture	Nasal fracture	HE.35.13	HF1	Nose fracture
HEAD	Synovitis / capsulitis	TMJ disorder	HE.51.30	HLT	Jaw Sprain/ TMJ symptoms
HEAD	Contusion (superficial)	Facial contusion	HE.60.24	HV1	Head/facial contusion/haematoma
HEAD	Laceration	Head Laceration	HE.60.25	HK1	Head/facial laceration
HEAD	Contusion (superficial)	Cauliflower ear	HE.61.24	HVC	Cauliflower Ear ( Chronic)
HEAD	Laceration	Scalp laceration	HE.61.25	HKS	Scalp laceration
HEAD	Abrasion	Scalp abrasion	HE.61.26	HIS	Scalp abrasion
HEAD	Laceration	Facial laceration	HE.62.25	HKZS	Facial laceration requiring suturing
HEAD	Abrasion	Facial abrasion	HE.62.26	HIF	Facial abrasion not otherwise specified
HEAD	Laceration	Tongue laceration	HE.63.25	HKT	Tongue laceration
HEAD	Vascular trauma	Epistaxis	HE.71.45	HVB	Epistaxis
HEAD	Injury without tissue type specified	Other eye injury	HE.80.00	HO1	Eye injury/trauma
HEAD	Abrasion	Corneal abrasion	HE.80.26	HOU	Corneal Abrasion
HEAD	Organ Trauma	Detached retina	HE.81.46	HOR	Retinal detachment
HEAD	Organ Trauma	Lens dislocation/subluxation	HE.82.46	HOL	Contact lens displacement
HEAD	Organ Trauma	Tinnitus / barotrauma	HE.83.46	MXEB	Barotrauma
HEAD	Organ Trauma	Traumatic perforated ear drum	HE.84.46	HO2	Perforated ear drum
HEAD	Injury without tissue type specified	Other injury to head	HE.90.00	HZ1	Headache/pain undiagnosed
HEAD	Injury without tissue type specified	Other Ear Injury	HE.91.00	MXN7	Nutritional (including vitamin deficiency)
HEAD	Injury without tissue type specified	Mouth /throat disorder	HE.92.00	MPZT	Nose / throat illness / condition
HEAD	Injury without tissue type specified	Other dental injury	HE.93.00	HFT	Avulsed/fractured tooth
NECK	Muscle Injury	Cervical strain / whiplash	NE.10.07	NLW	Whiplash/neck sprain
NECK	Muscle Injury	Torticolis / spasm	NE.10.08	NMT	Neck muscle trigger pts/spasm/torticollis
NECK	Muscle Injury	Trapezius strain	NE.11.07	NM1	Neck muscle strain
NECK	Muscle Injury	Trapezius trigger points	NE.11.08	NPM	Neck muscle and/or tendon strain/spasm/ trigger points
NECK	Muscle Injury	Suboccipital muscle strain	NE.12.07	NM1	Neck muscle strain
NECK	Peripheral nerve injury	Neck radiculopathy	NE.20.42	NN1	Cervical nerve root compression/stretch
NECK	Peripheral nerve injury	Brachial plexus syndrome (Stinger)	NE.21.39	SN1	Brachial plexus traction injury/ burner/ stinger
NECK	Brain & spinal cord injury	Cervical spinal contusion/concussion	NE.21.40	NN4	Cervical spinal cord concussion
NECK	Peripheral nerve injury	11th cranial nerve injury	NE.22.39	HN4	Cranial Nerve injury
NECK	Brain & spinal cord injury	Cervical spinal cord compression/transection	NE.22.40	NN2	Cervical spinal cord injury
NECK	Fracture	Cervical spine fracture	NE.31.13	NFC	Cervical Fracture/s
NECK	Injury without tissue type specified	Cervical spinal stenosis	NE.31.33	NN3	Cervical spinal canal stenosis
NECK	Synovitis / capsulitis	Cervical facet syndrome	NE.41.30	NP1	Cervical functional pain
NECK	Arthritis	Cervical facet osteoarthritis	NE.41.34	NA1	Cervical facet joint arthritis
NECK	Synovitis / capsulitis	Cervical degenerative disc disease	NE.42.30	NC2	Cervical disc degeneration
NECK	Injury without tissue type specified	Cervical disc herniation	NE.42.33	NCP	Cervical Disc Prolapse
NECK	Laceration	Neck laceration	NE.60.25	NKX	Neck Laceration
NECK	Abrasion	Neck abrasion	NE.60.26	NKX	Neck Laceration
NECK	Vascular trauma	Thoracic Outlet Syndrome	NE.70.45	SN3	Thoracic Outlet Syndrome (neural)
NECK	Injury without tissue type specified	Other neck injury	NE.90.00	NZ1	Neck pain undiagnosed
NECK	Contusion (superficial)	Neck / throat contusion	NE.90.24	NH1	Neck contusion/haematoma
SHOULDER	Muscle Injury	Deltoid strain	SH.11.07	SMD	Deltoid muscle injury
SHOULDER	Muscle Injury	Rotator cuff strain	SH.12.07	ST1	Rotator cuff tendon pathology
SHOULDER	Muscle Injury	Rotator cuff tear	SH.12.09	ST1	Rotator cuff tendon pathology
SHOULDER	Tendinopathy	Rotator cuff tendinopathy	SH.12.28	ST1	Rotator cuff tendon pathology
SHOULDER	Muscle Injury	Pectoralis strain	SH.13.07	SMP	Pectoralis major muscle strain
SHOULDER	Muscle Injury	Pectoralis tear / rupture	SH.13.09	SR3	Pec Major tendon rupture
SHOULDER	Tendinopathy	Long head of biceps tendinitis	SH.13.28	ST2	Biceps tendinopathy
SHOULDER	Muscle Injury	Rhomboid strain	SH.14.07	SMZ	Other shoulder muscle injury not elsewhere specified
SHOULDER	Tendon Rupture	Long head of biceps rupture	SH.14.09	SR2	Rupture of long head of biceps tendon
SHOULDER	Peripheral nerve injury	Shoulder neuroma	SH.20.41	SZ1	Shoulder pain undiagnosed
SHOULDER	Peripheral nerve injury	Shoulder reflex sympathetic dystrophy	SH.20.43	SZ1	Shoulder pain undiagnosed
SHOULDER	Peripheral nerve injury	Axillary nerve Injury - Isolated	SH.21.39	SN2	Isolated axillary nery palsy
SHOULDER	Peripheral nerve injury	Long thoracic nerve palsy / winging scapula	SH.22.39	SNX	Shoulder Neurological injury
SHOULDER	Peripheral nerve injury	Thoracodorsal nerve palsy	SH.23.39	SNX	Shoulder Neurological injury
SHOULDER	Peripheral nerve injury	Suprascapular nerve entrapment	SH.24.39	SN4	Suprascapular nerve entrapment or palsy
SHOULDER	Peripheral nerve injury	Axillary nerve Injury - With fracture or dislocation	SH.25.39	SDN	Shoulder dislocation with axillary nerve injury
SHOULDER	Fracture	Clavicular fracture	SH.32.13	SFC	Clavicular fracture
SHOULDER	Bone stress injury	Distal clavicular osteolysis	SH.32.33	SAO	Osteolysis of distal clavicle
SHOULDER	Fracture	Scapular fracture	SH.33.13	SF2	Scapula fracture
SHOULDER	Injury without tissue type specified	Os acrominale -symptomatic	SH.33.32	SZ1	Shoulder pain undiagnosed
SHOULDER	Fracture	Humeral neck fracture	SH.34.13	SF3	Fracture neck of humerus
SHOULDER	Physis injury	Humeral proximal growth plate / physeal injury	SH.34.20	UZX	Upper Arm Pain/ Injury not otherwise specified
SHOULDER	Injury without tissue type specified	Hill-Sachs Lesion	SH.34.21	SFS	Hill Sachs compression fracture
SHOULDER	Cartilage	Chondromalacia	SH.40.21	SC1	Shoulder chondral lesion
SHOULDER	Synovitis / capsulitis	Adhesive capsulitis / frozen shoulder	SH.40.30	SQF	Adhesive capsulitis / frozen shoulder
SHOULDER	Arthritis	Shoulder degenerative/osteoarthritis	SH.40.34	SAX	Shoulder Osteoarthritis
SHOULDER	Synovitis / capsulitis	Impingement syndrome/subacromial bursitis	SH.41.30	STD	Subacromial impingement
SHOULDER	Bursitis	Acute subacromial bursitis - calcific	SH.41.33	SBS	Acute subacromial impingement
SHOULDER	Arthritis	Acromioclavicular degnerative arthritis	SH.42.34	SAA	AC joint arthritis
SHOULDER	Cartilage	Bankart lesion	SH.44.17	SCL	Glenohumeral joint sprain with chondral/ labral damage ( incl SLAP tear)
SHOULDER	Cartilage	Glenoid labrum tear	SH.46.21	SCL	Glenohumeral joint sprain with chondral/ labral damage ( incl SLAP tear)
SHOULDER	Cartilage	SLAP lesion	SH.47.21	SCS	SLAP lesion shoulder
SHOULDER	Joint Sprain	Sternoclavicular joint 1° sprain -acute	SH.51.01	CLS	Sternoclavicular joint sprains
SHOULDER	Joint Sprain	Sternoclavicular joint 2° sprain -acute	SH.51.02	CLS	Sternoclavicular joint sprains
SHOULDER	Joint Sprain	Sternoclavicular joint 3° sprain -acute	SH.51.03	CLS	Sternoclavicular joint sprains
SHOULDER	Joint Sprain	Sternoclavicular joint 1° sprain -chronic	SH.51.04	CLS	Sternoclavicular joint sprains
SHOULDER	Joint Sprain	Sternoclavicular joint 2° sprain -chronic	SH.51.05	CLS	Sternoclavicular joint sprains
SHOULDER	Joint Sprain	Sternoclavicular joint 3° sprain -chronic	SH.51.06	CLS	Sternoclavicular joint sprains
SHOULDER	Joint Sprain	Acromioclavicular 1° sprain -acute	SH.52.01	SLA	Grade 1 A/C joint sprain
SHOULDER	Joint Sprain	Acromioclavicular 2° sprain -acute	SH.52.02	SLJ	Grade 2 A/C joint sprain
SHOULDER	Joint Sprain	Acromioclavicular 3° sprain -acute	SH.52.03	SLD	Grade 3 A/C joint dislocation
SHOULDER	Joint Sprain	Acromioclavicular 1° sprain -chronic	SH.52.04	SLA	Grade 1 A/C joint sprain
SHOULDER	Joint Sprain	Acromioclavicular 2° sprain -chronic	SH.52.05	SLJ	Grade 2 A/C joint sprain
SHOULDER	Joint Sprain	Acromioclavicular 3° sprain -chronic	SH.52.06	SLD	Grade 3 A/C joint dislocation
SHOULDER	Joint Sprain	Acromioclavicular 4° to 6° (Type IV-VI) sprain -acute	SH.52.10	SD2	Grade 4 - 6 A/C joint dislocation
SHOULDER	Chronic Instability	Acromioclavicular 4° to 6° (Type IV-VI) sprain -chronic	SH.52.12	SD2	Grade 4 - 6 A/C joint dislocation
SHOULDER	Joint Sprain	Anterior dislocation (initial)	SH.53.10	SDA	Shoulder dislocation (anterior)
SHOULDER	Joint Sprain	Anterior subluxation (initial)	SH.53.11	SUA	Anterior shoulder instability
SHOULDER	Chronic Instability	Anterior recurrent dislocation/instability	SH.53.12	SUA	Anterior shoulder instability
SHOULDER	Joint Sprain	Posterior dislocation (initial)	SH.54.10	SDP	Posterior shoulder dislocation
SHOULDER	Joint Sprain	Posterior subluxation	SH.54.11	SUP	Posterior shoulder instability
SHOULDER	Chronic Instability	Posterior recurrent dislocation/instability	SH.54.12	SUP	Posterior shoulder instability
SHOULDER	Chronic Instability	Multi-directional laxity (multidirectional)	SH.55.12	SU1	Chronic Shoulder instability
SHOULDER	Chronic Instability	Multi-directional instability (multidirectional)	SH.56.12	SU1	Chronic Shoulder instability
SHOULDER	Contusion (superficial)	Shoulder Contusion	SH.60.24	SH1	Shoulder contusion/haematoma
SHOULDER	Laceration	Shoulder laceration	SH.60.25	SKXS	Shoulder laceration requiring suturing
SHOULDER	Abrasion	Shoulder abrasion	SH.60.26	SIX	Shoulder Soft Tissue Abrasion
SHOULDER	Injury without tissue type specified	Other shoulder injury	SH.90.00	SZ1	Shoulder pain undiagnosed
SHOULDER	Injury without tissue type specified	Scapulothoracic dysfunction	SH.90.42	NZX	Neck Pain/ Injury Not Otherwise Specified
SHOULDER	Stump injury	shoulder disarticulation stump hematoma	SH.91.23
SHOULDER	Stump injury	shoulder disarticulation stump contusion	SH.91.24
SHOULDER	Stump injury	shoulder disarticulation stump laceration	SH.91.25
SHOULDER	Stump injury	shoulder disarticulation stump maceration	SH.91.26
SHOULDER	Stump injury	shoulder disarticulation stump bursitis	SH.91.31
SHOULDER	Stump injury	shoulder disarticulation stump neuroma	SH.91.41
SHOULDER	Stump injury	shoulder disarticulation stump pain (including phantom pain)	SH.91.42
UPPER ARM	Muscle Injury	Biceps brachii strain	AR.11.07	UM1	Biceps muscle strain
UPPER ARM	Muscle Injury	Distal biceps rupture	AR.11.09	ER1	Distal biceps tendon rupture
UPPER ARM	Muscle Injury	Biceps brachii myositis ossificans	AR.11.33	UHM	Upper arm myositis ossificans
UPPER ARM	Muscle Injury	Triceps strain	AR.12.07	UMT	Triceps muscle strain
UPPER ARM	Muscle Injury	Triceps rupture	AR.12.09	ER2	Distal triceps tendon rupture
UPPER ARM	Peripheral nerve injury	Radial nerve injury	AR.21.39	UNR	Radial nerve injury upper arm
UPPER ARM	Fracture	Humeral shaft fracture	AR.32.13	UF1	Midshaft humerus fracture
UPPER ARM	Bone stress injury	Humeral stress fracture	AR.32.18	US1	Stress fracture humerus
UPPER ARM	Laceration	Upper arm laceration	AR.60.25	UIX	Upper Arm Abrasion
UPPER ARM	Abrasion	Upper arm abrasion	AR.60.26	UIX	Upper Arm Abrasion
UPPER ARM	Injury without tissue type specified	Other arm injury	AR.90.00	SZP	Shoulder Pain/ Injury not otherwise specified
UPPER ARM	Contusion (superficial)	Upper Arm Contusion	AR.90.24	UHX	Upper Arm Soft Tissue Bruising/ Haematoma
UPPER ARM	Stump injury	trans-humeral (above-elbow) amputation stump hematoma	AR.91.23	UWS	Stump trauma upper arm
UPPER ARM	Stump injury	trans-humeral (above-elbow) amputation stump contusion	AR.91.24	UWS	Stump trauma upper arm
UPPER ARM	Stump injury	trans-humeral (above-elbow) amputation stump laceration	AR.91.25	UWS	Stump trauma upper arm
UPPER ARM	Stump injury	trans-humeral (above-elbow) amputation stump maceration	AR.91.26	UWS	Stump trauma upper arm
UPPER ARM	Stump injury	trans-humeral (above-elbow) amputation stump bursitis	AR.91.31	UWS	Stump trauma upper arm
UPPER ARM	Stump injury	trans-humeral (above-elbow) amputation stump neuroma	AR.91.41	UWS	Stump trauma upper arm
UPPER ARM	Stump injury	trans-humeral (above-elbow) amputation stump pain (including phantom pain)	AR.91.42	UWS	Stump trauma upper arm
ELBOW	Tendinopathy	Lateral epicondyopathy (tennis elbow)	EL.11.28	ET1	Tennis elbow (lateral epicondyle pain)
ELBOW	Tendinopathy	Medial epicondylopathy (golfers' elbow)	EL.12.28	ET2	Golfer's elbow (medial epicondyle pain)
ELBOW	Tendinopathy	Triceps tendinopathy	EL.13.28	ET3	Distal triceps tendinopathy
ELBOW	Tendinopathy	Biceps tendinopathy	EL.14.28	ETB	Distal biceps tendinopathy
ELBOW	Peripheral nerve injury	Elbow neuroma	EL.20.41	EN2	Other nerve entrapment, elbow
ELBOW	Peripheral nerve injury	Elbow reflex sympathetic dystrophy	EL.20.43
ELBOW	Peripheral nerve injury	Ulnar nerve subluxation	EL.21.39	EN1	Ulnar neuropathy, elbow
ELBOW	Peripheral nerve injury	Entrapment neuropathy / javelin elbow	EL.22.39	EN1	Ulnar neuropathy, elbow
ELBOW	Peripheral nerve injury	Median nerve injury	EL.23.39	UN1	Median nerve injury upper arm
ELBOW	Peripheral nerve injury	Radial nerve injury	EL.24.39	UNR	Radial nerve injury upper arm
ELBOW	Peripheral nerve injury	Posterior interosseous nerve entraptment	EL.25.39	UNX	Upper Arm neurological injury
ELBOW	Fracture	Supracondylar humeral fracture	EL.32.13	EFH	Supracondylar humeral fracture
ELBOW	Fracture	Medial epicondyle avulsion fracture	EL.33.14	EF1	Avulsion fracture distal humerus
ELBOW	Physis injury	Medial epicondyle growth plate / physeal injury	EL.33.20	EFX	Elbow Fractures
ELBOW	Bone contusion	Medial epicondyle contusion	EL.33.24	EV1	Elbow contusion/haematoma
ELBOW	Fracture	Lateral epicondyle avulsion fracture	EL.34.14	EF1	Avulsion fracture distal humerus
ELBOW	Physis injury	Lateral epicondyle growth plate / physeal injury	EL.34.20	EFX	Elbow Fractures
ELBOW	Bone contusion	Lateral epicondyle contusion	EL.34.24	EV1	Elbow contusion/haematoma
ELBOW	Fracture	Radial head fracture	EL.35.13	EF3	Fractured radial head
ELBOW	Fracture	Coronoid fracture	EL.36.13	EF2	Fractured humeral condyle(s)
ELBOW	Fracture	Olecranon avulsion fracture	EL.37.14	EFU	Fractured olecranon
ELBOW	Synovitis / capsulitis	Humero-ulnar Impingement Syndrome	EL.41.30	EQ1	Elbow atraumatic synovitis
ELBOW	Bursitis	Olecranon bursitis	EL.41.31	EB1	Elbow olecranon bursitis
ELBOW	Arthritis	Humero-ulnar degenerative/osteoarthritis	EL.41.34	EA1	Elbow Osteoarthritis
ELBOW	Arthritis	Humero-radial degenerative arthritis	EL.42.34	EA1	Elbow Osteoarthritis
ELBOW	Cartilage	Little league elbow / osetochondritis dissecans	EL.42.37	EGC	Capitellar osteochondrosis
ELBOW	Injury without tissue type specified	Radio-ulnar joint disorder	EL.43.00	EZ1	Elbow pain undiagnosed
ELBOW	Cartilage	Elbow Loose body	EL.43.21	ECL	Loose Body in Elbow
ELBOW	Joint Sprain	Elbow sprain -ill defined	EL.50.01	ELZ	Other elbow strain not otherwise specified
ELBOW	Joint Sprain	Elbow dislocation	EL.50.10	ED1	Dislocated elbow
ELBOW	Joint Sprain	Ulnar collateral ligament 1° sprain -acute	EL.51.01	ELM	Elbow medial ligament injury and CFO tear
ELBOW	Joint Sprain	Ulnar collateral ligament 2° sprain -acute	EL.51.02	ELM	Elbow medial ligament injury and CFO tear
ELBOW	Joint Sprain	Ulnar collateral ligament 3° sprain -acute	EL.51.03	ELR	Elbow medial ligament rupture/ grade 3 tear
ELBOW	Joint Sprain	Ulnar collateral ligament 1° sprain -chronic	EL.51.04	EU1	Elbow valgus instability
ELBOW	Joint Sprain	Ulnar collateral ligament 2° sprain -chronic	EL.51.05	EU1	Elbow valgus instability
ELBOW	Joint Sprain	Ulnar collateral ligament 3° sprain -chronic	EL.51.06	EU1	Elbow valgus instability
ELBOW	Joint Sprain	Annular ligament Injury	EL.52.01	ELZ	Other elbow strain not otherwise specified
ELBOW	Contusion (superficial)	Elbow contusion	EL.60.24	EV1	Elbow contusion/haematoma
ELBOW	Laceration	Elbow laceration	EL.60.25	EKX	Elbow Laceration
ELBOW	Abrasion	Elbow abrasion	EL.60.26	EKX	Elbow Laceration
ELBOW	Injury without tissue type specified	Other elbow injury	EL.90.00	ELJ	Sprained/jarred elbow
ELBOW	Stump injury	elbow disarticulation stump hematoma	EL.91.23	EWS	Stump trauma elbow
ELBOW	Stump injury	elbow disarticulation stump contusion	EL.91.24	EWS	Stump trauma elbow
ELBOW	Stump injury	elbow disarticulation stump laceration	EL.91.25	EWS	Stump trauma elbow
ELBOW	Stump injury	elbow disarticulation stump maceration	EL.91.26	EWS	Stump trauma elbow
ELBOW	Stump injury	elbow disarticulation stump bursitis	EL.91.31	EWS	Stump trauma elbow
ELBOW	Stump injury	elbow disarticulation stump neuroma	EL.91.41	EWS	Stump trauma elbow
ELBOW	Stump injury	elbow disarticulation stump pain (including phantom pain)	EL.91.42	EWS	Stump trauma elbow
FOREARM	Muscle compartment syndrome	Forearm exertional compartment syndrome	FA.10.36	RYC	Forearm compartment syndrome
FOREARM	Muscle Injury	Forearm flexor muscle strain	FA.11.07	RMF	Forearm flexor muscle strain
FOREARM	Muscle Injury	Forearm extensor muscle strain	FA.12.07	RME	Forearm extensor muscle strain
FOREARM	Muscle Injury	Brachioradialis strain	FA.13.07	RM1	Forearm Muscle Injury
FOREARM	Peripheral nerve injury	Forearm reflex sympathetic dystrophy	FA.20.43	RZW
FOREARM	Fracture	Radius fracture (including Colles')	FA.32.13	RFC	Colles fracture radius
FOREARM	Fracture	Radius greenstick fracture	FA.32.19	RF1	Fractured forearm bone(s)
FOREARM	Fracture	Ulnar fracture	FA.33.13	RFM	Fractured ulna midshaft
FOREARM	Contusion (superficial)	Forearm Contusion	FA.60.24	RH1	Forearm contusion/haematoma
FOREARM	Laceration	Forearm laceration	FA.60.25	RK1	Complication of forearm laceration/ abrasion including infection
FOREARM	Abrasion	Forearm abrasion	FA.60.26	RIX	Forearm Abrasion
FOREARM	Injury without tissue type specified	Other forearm injury	FA.90.00	RZX	Forearm Pain/ Injury not otherwise specified
FOREARM	Stump injury	trans-radial (below-elbow) amputation stump hematoma	FA.91.23	RWS	Stump trauma forearm
FOREARM	Stump injury	trans-radial (below-elbow) amputation stump contusion	FA.91.24	RWS	Stump trauma forearm
FOREARM	Stump injury	trans-radial (below-elbow) amputation stump laceration	FA.91.25	RWS	Stump trauma forearm
FOREARM	Stump injury	trans-radial (below-elbow) amputation stump maceration	FA.91.26	RWS	Stump trauma forearm
FOREARM	Stump injury	trans-radial (below-elbow) amputation stump bursitis	FA.91.31	RWS	Stump trauma forearm
FOREARM	Stump injury	trans-radial (below-elbow) amputation stump neuroma	FA.91.41	RWS	Stump trauma forearm
FOREARM	Stump injury	trans-radial (below-elbow) amputation stump pain (including phantom pain)	FA.91.42	RWS	Stump trauma forearm
WRIST	Tendinopathy	Wrist extensor tendinopathy	WR.11.28	WTE	wrist extensor tenosynovitis/ tendinopathy at wrist
WRIST	Tendinopathy	Wrist extensor tenosynovitis	WR.11.29	WTE	wrist extensor tenosynovitis/ tendinopathy at wrist
WRIST	Tendinopathy	Wirst flexor tendinopathy	WR.12.28	WTF	Wrist flexor tenosynovitis/ tendinopathy
WRIST	Tendinopathy	Wrist flexor tenosynovitis	WR.12.29	WTF	Wrist flexor tenosynovitis/ tendinopathy
WRIST	Tendinopathy	DeQuervain's Disease	WR.13.28	WT1	De Quervain's tenosynovitis
WRIST	Tendinopathy	Extensor Carpi Ulnaris Subluxation	WR.14.28	WTD	Wrist extensor tendon injury
WRIST	Peripheral nerve injury	Wrist neuroma	WR.20.41	MRBXW	Tumour wrist/ hand
WRIST	Peripheral nerve injury	Wrist reflex sympathetic dystrophy	WR.20.43	PP2	Chronic regional pain syndrome
WRIST	Peripheral nerve injury	Carpal tunnel syndrome	WR.21.39	WN1	Carpal Tunnel Syndrome
WRIST	Peripheral nerve injury	Ulnar nerve entrapment (Tunnel of Guyon)	WR.22.39	WNX	Wrist Neurological Injury
WRIST	Fracture	Scaphoid fracture	WR.32.13	WF1	Fractured scaphoid
WRIST	Fracture	Scaphoid fracture-non-union	WR.32.15	WEN	Non union fractured scaphoid
WRIST	Avascular necrosis	Scaphoid avascular necrosis	WR.32.35	WES	Avascular necrosis scaphoid
WRIST	Fracture	Lunate fracture	WR.33.13	WF2	Fracture other carpal bone
WRIST	Avascular necrosis	Kienboch's disease	WR.33.35	WGO	Osteochondrosis of wrist and hand
WRIST	Fracture	Triquetrium fracture	WR.34.13	WF2	Fracture other carpal bone
WRIST	Fracture	Pisiform fracture	WR.35.13	WF2	Fracture other carpal bone
WRIST	Fracture	Trapezium fracture	WR.36.13	WFT	Fractured trapezium
WRIST	Fracture	Trapezoid fracture	WR.37.13	WF2	Fracture other carpal bone
WRIST	Fracture	Capitate fracture	WR.38.13	WF2	Fracture other carpal bone
WRIST	Fracture	Hamate fracture	WR.39.13	WFH	Fractured hamate
WRIST	Fracture	Hook of hamate fracture	WR.39.14	WFO	Fractured hook of hamate
WRIST	Synovitis / capsulitis	Wrist capsulitis	WR.40.30	WZW	Other wrist pain NOS
WRIST	Synovitis / capsulitis	Wrist impingement	WR.40.33	WP1	Wrist and Hand Impingement/ Synovitis
WRIST	Synovitis / capsulitis	Wrist degenerative/osteoarthritis	WR.40.34	WAW	Wrist osteoarthritis
WRIST	Synovitis / capsulitis	Dorsal wrist ganglion	WR.41.30	WT2	Wrist ganglion
WRIST	Synovitis / capsulitis	Volar wrist ganglion	WR.42.30	WT2	Wrist ganglion
WRIST	Cartilage	Triangular fibrocartillage complex tear	WR.48.21	WC1	Wrist fibrocartilage tear
WRIST	Joint Sprain	Wrist sprain	WR.50.01	WLJ	Sprained/jarred wrist jt
WRIST	Joint Sprain	Distal radio-ulnar joint dislocation	WR.51.10	WDD	DRUJ dislocation
WRIST	Chronic Instability	Distal radio-ulnar joint instablility	WR.51.12	WU2	Distal radioulnar joint instability
WRIST	Joint Sprain	Scapholunate dissociation	WR.52.10	WU1	Scapholunate ( DISI) instability
WRIST	Chronic Instability	Scapholunate instability	WR.52.12	WU1	Scapholunate ( DISI) instability
WRIST	Joint Sprain	Lunate dislocation	WR.53.10	WLL	Scapholunate ligament sprain/ tear
WRIST	Joint Sprain	Scapholunate DISI/VISI	WR.54.11	WU1	Scapholunate ( DISI) instability
WRIST	Joint Sprain	Pisotriquetral joint injury	WR.55.01	WZW	Other wrist pain NOS
WRIST	Chronic Instability	Mid-carpal instability	WR.56.12	WUC	Carpal instability
WRIST	Contusion (superficial)	Wrist contusion	WR.60.24	WH1	Wrist bruising/ haematoma
WRIST	Laceration	Wrist laceration	WR.60.25	WKW	Wrist laceration/ abrasion
WRIST	Abrasion	Wrist abrasion	WR.60.26	WKW	Wrist laceration/ abrasion
WRIST	Injury without tissue type specified	Other wrist injury	WR.90.00	WZW	Other wrist pain NOS
WRIST	Stump injury	wrist disarticulation stump hematoma	WR.91.23
WRIST	Stump injury	wrist disarticulation stump contusion	WR.91.24
WRIST	Stump injury	wrist disarticulation stump laceration	WR.91.25
WRIST	Stump injury	wrist disarticulation stump maceration	WR.91.26
WRIST	Stump injury	wrist disarticulation stump bursitis	WR.91.31
WRIST	Stump injury	wrist disarticulation stump neuroma	WR.91.41
WRIST	Stump injury	wrist disarticulation stump pain (including phantom pain)	WR.91.42
HAND	Tendon Rupture	Extensor expansion tendon tear/rupture	HA.11.09	WRD	Rupture wrist extensor tendon
HAND	Laceration	Extensor expansion tendon laceration	HA.11.25	PKH	Hand laceration
HAND	Tendon Rupture	Flexor digitorum superficialus tear/rupture	HA.12.09	PT1	Index finger flexor tendon rupture
HAND	Tendinopathy	Trigger finger	HA.12.28	PTG	Trigger Finger
HAND	Tendon Rupture	Flexor digitorum profundus tear/rupture	HA.13.09	PT1	Index finger flexor tendon rupture
HAND	Tendinopathy	Dupuytren's contacture	HA.14.28	PTD	Dupytron's Contracture
HAND	Muscle Injury	Intrinsic muscle strain	HA.15.07	WMX	Wrist and Hand Muscle Injury
HAND	Peripheral nerve injury	Hand reflex sympathetic dystrophy	HA.20.43	PP2	Chronic regional pain syndrome
HAND	Fracture	First metacarpal fracture	HA.32.13	PF7	Fracture shaft 1st metacarpal
HAND	Fracture	First metacarpal fracture/dislocation (Bennett's)	HA.32.16	PF1	Bennett's fracture/dislocation thumb
HAND	Fracture	Second metacarpal fracture	HA.33.13	PFB	Fracture 2nd metacarpal
HAND	Fracture	Other metacarpal fracture	HA.34.13	PFM	Fracture metacarpals 2- 5
HAND	Fracture	Thumb phalanx fracture	HA.35.13	PFT	Fractured thumb
HAND	Fracture	Proximal phalyngeal fracture of fingers	HA.36.13	PF3	Fractured phalanx
HAND	Fracture	Middle phalyngeal fracture of fingers	HA.37.13	PF3	Fractured phalanx
HAND	Fracture	Distal phalyngeal fracture of fingers	HA.38.13	PF3	Fractured phalanx
HAND	Joint Sprain	Ulnar collateral ligament 1° sprain -acute (skier's thumb)	HA.51.01	PLU	Thumb UCL lig rupture at MCP joint ( skier's thumb)
HAND	Joint Sprain	Ulnar collateral ligament 2° sprain -acute (skier's thumb)	HA.51.02	PLU	Thumb UCL lig rupture at MCP joint ( skier's thumb)
HAND	Joint Sprain	Ulnar collateral ligament 3° sprain -acute (skier's thumb)	HA.51.03	PLU	Thumb UCL lig rupture at MCP joint ( skier's thumb)
HAND	Joint Sprain	Ulnar collateral ligament 1° sprain -chronic	HA.51.04	PUM	1st MCP joint instability
HAND	Joint Sprain	Ulnar collateral ligament 2° sprain -chronic	HA.51.05	PUM	1st MCP joint instability
HAND	Joint Sprain	Ulnar collateral ligament 3° sprain -chronic	HA.51.06	PUM	1st MCP joint instability
HAND	Joint Sprain	First metacarpophalyngeal joint dislocation	HA.51.10	PDW	Dislocation of MCP joint finger(s)
HAND	Joint Sprain	Other metacarpophalyngeal joint dislocation	HA.52.10	WDP	Dislocation of thumb joint
HAND	Joint Sprain	Other metacarpophalyngeal joint sprain	HA.53.01	PLM	Metacarpaophalangeal joint sprain
HAND	Joint Sprain	Thumb interphalyngeal joint dislocation	HA.54.10	PDF	Dislocation of IP joint thumb
HAND	Joint Sprain	Finger proximal interphalyngeal joint sprain	HA.55.01	PFA	Avulsion fracture phalanx
HAND	Joint Sprain	Finger proximal interphalyngeal joint dislocation	HA.55.10	PD1	Disl metacarpophalangeal or interphalangeal jt
HAND	Joint Sprain	Finger distal interphalyngeal joint sprain	HA.56.01	PFA	Avulsion fracture phalanx
HAND	Joint Sprain	Finger distal interphalyngeal joint dislocation	HA.56.10	PD1	Disl metacarpophalangeal or interphalangeal jt
HAND	Contusion (superficial)	Hand contusion	HA.60.24	PH1	Hand muscle bruising/ haematoma
HAND	Laceration	Hand laceration	HA.60.25	PKH	Hand laceration
HAND	Abrasion	Hand abrasion	HA.60.26	PKH	Hand laceration
HAND	Abrasion	Hand blister	HA.60.27	PK2	Wrist and Hand Laceration/ Abrasion
HAND	Abrasion	Finger blister	HA.61.27	PK2	Wrist and Hand Laceration/ Abrasion
HAND	Injury without tissue type specified	Other finger nail injury	HA.62.00
HAND	Injury without tissue type specified	Nail avulsion	HA.62.09	PKN	Laceration of fingernail/ nailbed
HAND	Contusion (superficial)	Subungal hematoma	HA.62.24	PVN	Fingernail haematoma
HAND	Injury without tissue type specified	Other hand injury	HA.90.00	WZH	Other hand pain NOS
HAND	Stump injury	partial hand amputation stump hematoma	HA.91.23
HAND	Stump injury	partial hand amputation stump contusion	HA.91.24
HAND	Stump injury	partial hand amputation stump laceration	HA.91.25
HAND	Stump injury	partial hand amputation stump maceration	HA.91.26
HAND	Stump injury	partial hand amputation stump bursitis	HA.91.31
HAND	Stump injury	partial hand amputation stump neuroma	HA.91.41
HAND	Stump injury	partial hand amputation stump pain (including phantom pain)	HA.91.42
CHEST	Muscle Injury	Intercostal muscle strain	CH.11.07	CM2	Chest muscle strain
CHEST	Muscle Injury	Serratus anterior strain	CH.12.07	SMZ	Other shoulder muscle injury not elsewhere specified
CHEST	Muscle Injury	Latissimus dorsi strain	CH.13.07	SML	Latissimus dorsi muscle strain
CHEST	Fracture	Rib fracture	CH.32.13	CF1	Fractured rib(s)
CHEST	Bone stress injury	Rib stress fracture	CH.32.18	CS1	Stress fracture rib(s)
CHEST	Bone contusion	Rib contusion	CH.32.24	CJ1	Bruised ribs/chest wall
CHEST	Fracture	Sternum / xyphoid fracture	CH.33.13	CF2	Sternal fracture
CHEST	Synovitis / capsulitis	Rib cartilage Injury / costochondritis	CH.44.30	CCR	Costochondritis
CHEST	Joint Sprain	Rib anterior displacement/subluxation	CH.51.11
CHEST	Contusion (superficial)	Thoracic contusion	CH.60.24	DH1	Thoracic Soft Tissue Bruising/ Haematoma
CHEST	Laceration	Chest laceration	CH.60.25	CKX	Chest Wall laceration/ Abrasion
CHEST	Abrasion	Chest abrasion	CH.60.26	CKX	Chest Wall laceration/ Abrasion
CHEST	Organ Trauma	Pnuemothorax - Traumatic	CH.80.46	COP	Pneumothorax
CHEST	Injury without tissue type specified	Other chest injury	CH.90.00	DZX	Thoracic Pain/ Injury not otherwise specified
THORACIC SPINE	Muscle Injury	Postural Dysfunction	TS.10.42
THORACIC SPINE	Muscle Injury	Parathoracic muscle strain	TS.11.07	DMM	Thoracic Muscle Strain/ Spasm/ Trigger Points
THORACIC SPINE	Peripheral nerve injury	Thoracic neuroma	TS.20.41	MRBXD	Tumour thoracic spine/ chest wall
THORACIC SPINE	Peripheral nerve injury	Thoracic reflex sympathetic dystrophy	TS.20.43	DZX	Thoracic Pain/ Injury not otherwise specified
THORACIC SPINE	Brain & spinal cord injury	Thoracic spinal contusion/concussion	TS.21.40	DH1	Thoracic Soft Tissue Bruising/ Haematoma
THORACIC SPINE	Brain & spinal cord injury	Thoracic spinal cord compression/transection	TS.22.40	DZX	Thoracic Pain/ Injury not otherwise specified
THORACIC SPINE	Fracture	Thoracic Spine fracture	TS.31.13	DFX	Thoracic Spine Fracture
THORACIC SPINE	Physis injury	Scheurmann's disease	TS.31.20	DG1	Scheuermanns disease
THORACIC SPINE	Injury without tissue type specified	Scoliosis or Kyphosis	TS.31.38	MRJSD	Thoracic scoliosis
THORACIC SPINE	Synovitis / capsulitis	Thoracic facet syndrome	TS.41.30	DP1	Chronic thoracic functional pain
THORACIC SPINE	Synovitis / capsulitis	Costovertebral dysfunction	TS.43.30	DUV	Costovertebral joint instability
THORACIC SPINE	Injury without tissue type specified	Thoracic disc herniation	TS.52.33	DC1	Thoracic disc prolapse
THORACIC SPINE	Injury without tissue type specified	Thoracic degenerative disc disease	TS.52.42	DC1	Thoracic disc prolapse
ABDOMEN	Muscle Injury	Abdominal "stitch" / exercise induced diaphragmatic spasm	AB.10.08	OPY	Abdominal muscle cramps
ABDOMEN	Muscle Injury	Rectus Abdominus strain	AB.11.07	GMR	Rectus abdominus strain
ABDOMEN	Muscle Injury	Diastasis Rectii	AB.11.09	OT1	Divarication of rectus abdominis
ABDOMEN	Muscle Injury	Abdominal wall strain	AB.12.07	OM1	Truncal Muscle Trigger Points/ Spasm
ABDOMEN	Laceration	Abdomen laceration	AB.60.25	OKX	Truncal Laceration/ Abrasion
ABDOMEN	Abrasion	Abdomen abrasion	AB.60.26	OKX	Truncal Laceration/ Abrasion
ABDOMEN	Organ Trauma	Liver contusion / injury	AB.81.46	OOL	Liver trauma
ABDOMEN	Organ Trauma	Spleen contusion / injury	AB.82.46	OOS	Spleen trauma
ABDOMEN	Organ Trauma	Kidney Contusion	AB.83.46	OOK	Kidney trauma
ABDOMEN	Injury without tissue type specified	Other abdominal injury	AB.90.00	OOH	Trunk and Abdominal Injury
LUMBOSACRAL SPINE	Muscle Injury	Paralumbar muscle strain	LS.13.07	LM1	Lumbar Spine muscle and Tendon Strain/ Spasm/ Trigger Points
LUMBOSACRAL SPINE	Peripheral nerve injury	Lumbar neuroma	LS.20.41	LNZ	Other lumbosacral nerve injury
LUMBOSACRAL SPINE	Peripheral nerve injury	Lumbar reflex sympathetic dystrophy	LS.20.43	LNZ	Other lumbosacral nerve injury
LUMBOSACRAL SPINE	Peripheral nerve injury	Sciatica	LS.21.39	LN4	Lumbosacral nerve stretch/ traction injury
LUMBOSACRAL SPINE	Brain & spinal cord injury	Lumbar spinal contusion/concussion	LS.21.40	LNZ	Other lumbosacral nerve injury
LUMBOSACRAL SPINE	Peripheral nerve injury	Lumbar nerve root impingement	LS.22.39	LNA	Lumbosacral Nerve root impingement due to foraminal stenosis bony and disc
LUMBOSACRAL SPINE	Brain & spinal cord injury	Lumbar spinal cord compression/transection	LS.22.40	LNZ	Other lumbosacral nerve injury
LUMBOSACRAL SPINE	Peripheral nerve injury	Pudendal nerve injury	LS.23.39	LNB	Buttock Nerve Injury
LUMBOSACRAL SPINE	Peripheral nerve injury	Perineal nerve injury	LS.24.39	LNB	Buttock Nerve Injury
LUMBOSACRAL SPINE	Injury without tissue type specified	Spinal stenosis	LS.31.00	LN3	Lumbar Spinal canal stenosis
LUMBOSACRAL SPINE	Fracture	Lumbar spine fracture	LS.31.13	LFX	Lumbar Spine Fracture
LUMBOSACRAL SPINE	Bone stress injury	Pars stress fracture/ reaction	LS.31.18	LSG	Other stress fracture pelvis
LUMBOSACRAL SPINE	Injury without tissue type specified	Kissing spine	LS.31.33	LAX	Osteoarthritis Lumbosacral spine
LUMBOSACRAL SPINE	Fracture	Sacrum / coccyx fracture	LS.32.13	LFS	Fractured sacrum
LUMBOSACRAL SPINE	Bone stress injury	Spondylolysis	LS.32.18	LZX	Lumbar Pain/ Injury nor otherwise specified
LUMBOSACRAL SPINE	Bone stress injury	coccydynia	LS.32.33	LLC	Sacrococcygeal joint injury/ pain
LUMBOSACRAL SPINE	Injury without tissue type specified	Spodylolisthesis	LS.33.18	LUSX	Spondylolisthesis any Level
LUMBOSACRAL SPINE	Synovitis / capsulitis	Lumbar facet syndrome	LS.41.30	LP1	Chronic lumbar functional pain
LUMBOSACRAL SPINE	Arthritis	Lumbar facet osteoarthritis	LS.41.34	LA1	Facet joint OA lumbosacral spine
LUMBOSACRAL SPINE	Injury without tissue type specified	Lumbar disc herniation	LS.42.33	LCP	Lumbar disc prolapse
LUMBOSACRAL SPINE	Injury without tissue type specified	Lumbar degenerative disc disease	LS.42.42	LC2	Disc degeneration
LUMBOSACRAL SPINE	Synovitis / capsulitis	Sacroiliac asymmetry/dysfunction	LS.43.30	LUS	Sacroiliac Joint Instability
LUMBOSACRAL SPINE	Laceration	Low back laceraton	LS.60.25	LKX	Lumbar Laceration
LUMBOSACRAL SPINE	Abrasion	Low back abrasion	LS.60.26	LKX	Lumbar Laceration
LUMBOSACRAL SPINE	Injury without tissue type specified	Other Lumbar injury	LS.90.00	LZX	Lumbar Pain/ Injury nor otherwise specified
LUMBOSACRAL SPINE	Contusion (superficial)	Low Back Contusion	LS.90.24	LH1	Lumbar contusion/haematoma
LUMBOSACRAL SPINE	Injury without tissue type specified	Non-specific low back pain / mechanical pain	LS.90.42	LZX	Lumbar Pain/ Injury nor otherwise specified
LUMBOSACRAL SPINE	Stump injury	trans-pelvic disarticulation stump hematoma	LS.91.23
LUMBOSACRAL SPINE	Stump injury	trans-pelvic disarticulation stump contusion	LS.91.24
LUMBOSACRAL SPINE	Stump injury	trans-pelvic disarticulation stump laceration	LS.91.25
LUMBOSACRAL SPINE	Stump injury	trans-pelvic disarticulation stump maceration	LS.91.26
LUMBOSACRAL SPINE	Stump injury	trans-pelvic disarticulation stump bursitis	LS.91.31
LUMBOSACRAL SPINE	Stump injury	trans-pelvic disarticulation stump neuroma	LS.91.41
LUMBOSACRAL SPINE	Stump injury	trans-pelvic disarticulation stump pain (including phantom pain)	LS.91.42
HIP/GROIN	Muscle Injury	Iliopsoas strain	HI.11.07	GMP	Iliopsoas muscle strain/ tear
HIP/GROIN	Muscle Injury	Gluteus maximius strain	HI.12.07	TMX	Gluteus maximus strain
HIP/GROIN	Muscle Injury	Gluteus maximius tear	HI.12.09	TMX	Gluteus maximus strain
HIP/GROIN	Muscle Injury	Gluteus medius strain	HI.13.07	TMG	Gluteus medius/ minimus strain
HIP/GROIN	Muscle Injury	Gluteus medius tear	HI.13.09	TMG	Gluteus medius/ minimus strain
HIP/GROIN	Muscle Injury	Lateral rotator strain	HI.14.07	LMG	Gluteal muscle strain
HIP/GROIN	Muscle Injury	Medial rotator strain	HI.15.07	LMG	Gluteal muscle strain
HIP/GROIN	Muscle Injury	Tensor Fasciea Latae strain	HI.16.07	GM1	Hip flexor muscle strain
HIP/GROIN	Muscle Injury	Tensor fasciea latae spasm	HI.16.08	GM1	Hip flexor muscle strain
HIP/GROIN	Muscle Injury	Tensor Fasciea Latae tear/rupture	HI.16.09	GM1	Hip flexor muscle strain
HIP/GROIN	Muscle contusion	Tensor Fasciea Latae contusion	HI.16.24	GM1	Hip flexor muscle strain
HIP/GROIN	Muscle Injury	Proximal adductor strain	HI.17.07	GTLS	Adductor longus tendon strain
HIP/GROIN	Muscle Injury	Proximal adductor spasm	HI.17.08	TMZ	Thigh Muscle strain/ Spasm/ Trigger Points
HIP/GROIN	Muscle Injury	Proximal adductor tear/rupture	HI.17.09	GRA	Adductor longus tendon rupture
HIP/GROIN	Muscle contusion	Proximal adductor contusion	HI.17.24	THD	Adductor muscle haematoma
HIP/GROIN	Tendinopathy	Proximal adductor tendinopathy	HI.17.28	GT1	Adductor origin tendinopathy
HIP/GROIN	Muscle Injury	Sports Hernia	HI.18.07	GTH	Sportsman's hernia
HIP/GROIN	Peripheral nerve injury	Ilioinguinal Nerve Entrapment	HI.20.39	GNI	Ilioinguinal nerve entrapment
HIP/GROIN	Peripheral nerve injury	Hip neuroma	HI.20.41	GZX	Hip/ Groin Pain Not otherwise specified
HIP/GROIN	Peripheral nerve injury	Piriformis Syndrome	HI.20.42	LNP	Piriformis syndrome (with sciatic nerve impingement)
HIP/GROIN	Peripheral nerve injury	Hip reflex sympathetic dystrophy	HI.20.43	GZX	Hip/ Groin Pain Not otherwise specified
HIP/GROIN	Peripheral nerve injury	Meralgia paresthetica	HI.21.42	TNEL	Lateral cutaneous nerve of thigh entrapment
HIP/GROIN	Peripheral nerve injury	Obturator nerve entrapment	HI.22.39	GNO	Obturator nerve entrapment
HIP/GROIN	Physis injury	ASIS apophysitis / avulsion	HI.32.20	GGS	Apophysitis/ avulsion fracture ASIS
HIP/GROIN	Fracture	Ilium fracture	HI.33.13	GF3	Fractured Ilium
HIP/GROIN	Fracture	ASIS avulsion fracture	HI.33.14	GGS	Apophysitis/ avulsion fracture ASIS
HIP/GROIN	Physis injury	Ilium growth plate / physeal injury	HI.33.20	GGO	Apophysitis/ avulsion fracture iliac crest
HIP/GROIN	Bone contusion	Hip Pointer (Iliac Crest Contusion)	HI.33.24	THI	Bruising/ haematoma iliac crest/ glut medius
HIP/GROIN	Fracture	Femoral neck / head fracture	HI.34.13	GFN	Fractured neck of femur
HIP/GROIN	Bone stress injury	Femoral neck stress fracture	HI.34.18	GSN	Femoral neck stress fracture
HIP/GROIN	Physis injury	AIIS apophysitis / avulsion	HI.34.20	GGR	Apophysitis/ avulsion fracture AIIS
HIP/GROIN	Fracture	Pubic Fracture	HI.35.13	GFP	Fracture pubic ramus
HIP/GROIN	Bone stress injury	Pubic stress fracture	HI.35.18	GSP	Pelvic stress fracture
HIP/GROIN	Physis injury	Slipped capitus femorus	HI.35.20	GG2	Slipped capital femoral epiphysis
HIP/GROIN	Bone stress injury	Osteitis Pubis	HI.35.32	GS1	Osteitis pubis
HIP/GROIN	Avascular necrosis	Legg-Perthes	HI.35.35	GEP	Perthes disease
HIP/GROIN	Fracture	Intertrochanteric fracture	HI.36.13	GFF	Femoral fracture
HIP/GROIN	Fracture	Acetablular fracture	HI.37.13	GF1	Acetabular fracture
HIP/GROIN	Cartilage	Hip chondromalacia	HI.40.21	GC1	Hip Joint Chondral/ Osteochondral Injury
HIP/GROIN	Synovitis / capsulitis	Hip femoral acetabular impingement	HI.40.30	GZX	Hip/ Groin Pain Not otherwise specified
HIP/GROIN	Arthritis	Hip degenerative/osteoarthritis	HI.40.34	GA1	Hip jt osteoarthritis
HIP/GROIN	Bursitis	Greater trochanteric bursitis / snapping hip syndrome	HI.41.31	TTM	Gluteus med/ min tendinopathy
HIP/GROIN	Bursitis	Iliopsoas bursitis	HI.42.31	GT3	Iliopsoas tendinopathy/bursitis
HIP/GROIN	Synovitis / capsulitis	Hip capsulitis	HI.43.30	GQH	Synovitis of hip joint
HIP/GROIN	Synovitis / capsulitis	Hip loose body	HI.44.30	GQX	Hip Joint Inflammation/ Synovitis/ Other Biomechanical Lesion
HIP/GROIN	Cartilage	Hip labral tear	HI.45.21	GCL	Labral tear, hip joint
HIP/GROIN	Injury without tissue type specified	Symphysis Pubis Diastasis	HI.54.09	GUP	Pubic symphysis instability
HIP/GROIN	Contusion (superficial)	Hip Contusion	HI.60.24	GH1	contusion/haematoma, hip region
HIP/GROIN	Laceration	Hip laceration	HI.60.25	GKX	Hip and Groin Laceration
HIP/GROIN	Abrasion	Hip abrasion	HI.60.26	GKX	Hip and Groin Laceration
HIP/GROIN	Vascular trauma	Hip arterial injury / disorder	HI.71.45	GVH	Vascular Injury Hip Joint
HIP/GROIN	Vascular trauma	Hip venous injury / disorder	HI.72.45	GVH	Vascular Injury Hip Joint
HIP/GROIN	Injury without tissue type specified	Hernia - Inguinal and Femoral	HI.80.00	OTH	Sports hernia/abdominal tendinopathy
HIP/GROIN	Organ Trauma	Testicular Contusion	HI.80.46	GO2	Testicular/scrotal contusion/haematoma
HIP/GROIN	Injury without tissue type specified	Other hip injury	HI.90.00	GZX	Hip/ Groin Pain Not otherwise specified
HIP/GROIN	Stump injury	hip disarticulation stump hematoma	HI.91.23
HIP/GROIN	Stump injury	hip disarticulation stump contusion	HI.91.24
HIP/GROIN	Stump injury	hip disarticulation stump laceration	HI.91.25
HIP/GROIN	Stump injury	hip disarticulation stump maceration	HI.91.26
HIP/GROIN	Stump injury	hip disarticulation stump bursitis	HI.91.31
HIP/GROIN	Stump injury	hip disarticulation stump neuroma	HI.91.41
HIP/GROIN	Stump injury	hip disarticulation stump pain (including phantom pain)	HI.91.42
THIGH	Muscle compartment syndrome	Thigh acute compartment syndrome	TH.10.36	TZ1	Thigh pain/ Injury Not otherwise specified
THIGH	Muscle Injury	Quadraceps strain	TH.11.07	TM2	Quadriceps strain/tear
THIGH	Muscle Injury	Quadraceps spasm	TH.11.08	TMZ	Thigh Muscle strain/ Spasm/ Trigger Points
THIGH	Muscle Injury	Quadraceps tear/rupture	TH.11.09	TMQ	Rectus femoris rupture
THIGH	Muscle contusion	Quadraceps contusion	TH.11.24	TH1	Contusion/haematoma of thigh
THIGH	Muscle Injury	Quadraceps myositis ossificans	TH.11.33	THM	Myositis ossificans thigh
THIGH	Muscle compartment syndrome	Thigh exertional compartment syndrome	TH.11.36	TYC	Compartment Syndrome of Thigh
THIGH	Muscle Injury	Hamstring strain	TH.12.07	TM1	Hamstring strain/tear
THIGH	Muscle Injury	Hamstring spasm	TH.12.08	TMZ	Thigh Muscle strain/ Spasm/ Trigger Points
THIGH	Muscle Injury	Hamstring tear/rupture	TH.12.09	TM1	Hamstring strain/tear
THIGH	Muscle contusion	Hamstring contusion	TH.12.24	THH	Hamstring muscle haematoma
THIGH	Muscle Injury	Hamstring myositis ossificans	TH.12.33	THH	Hamstring muscle haematoma
THIGH	Muscle Injury	Adductor muscle strain	TH.13.07	GTLS	Adductor longus tendon strain
THIGH	Muscle Injury	Adductor muscle spasm	TH.13.08	TMZ	Thigh Muscle strain/ Spasm/ Trigger Points
THIGH	Muscle Injury	Adductor muscle tear/rupture	TH.13.09	GRA	Adductor longus tendon rupture
THIGH	Muscle contusion	Adductor muscle contusion	TH.13.24	THD	Adductor muscle haematoma
THIGH	Tendinopathy	Adductor tendinopathy	TH.13.28	GT1	Adductor origin tendinopathy
THIGH	Muscle Injury	Adductor myositis ossificans	TH.13.33	THM	Myositis ossificans thigh
THIGH	Muscle Injury	Sartorius strain	TH.14.07	GTSS	Sartorius tendon strain
THIGH	Fracture	Femoral fracture	TH.32.13	TFX	Thigh Fractures
THIGH	Fracture	Femoral avulsion fracture	TH.32.14	TFX	Thigh Fractures
THIGH	Fracture	Femoral fracture -non-union	TH.32.15	GFF	Femoral fracture
THIGH	Bone stress injury	Femoral stress fracture	TH.32.18	TSF	Femoral shaft stress fracture
THIGH	Fracture	Femoral greenstick fracture	TH.32.19	TFX	Thigh Fractures
THIGH	Physis injury	Femoral growth plate / physeal injury	TH.32.20	TZ1	Thigh pain/ Injury Not otherwise specified
THIGH	Bone stress injury	Femoral periostitis	TH.32.32	TTP	Tenoperiostitis of Thigh
THIGH	Injury without tissue type specified	Femoral exostosis	TH.33.32	MRBXT	Tumour thigh
THIGH	Fracture	Ischium fracture	TH.34.13	LFI	Fractured ischium
THIGH	Fracture	Ischium avulsion fracture	TH.34.14	GGH	Apophysitis/ avulsion fracture Iischial tuberosity
THIGH	Physis injury	Ischium growth plate / physeal injury	TH.34.20	GG1	Traction injury to apophysis at buttock and pelvis
THIGH	Cartilage	Femoral osteochondral fracture	TH.42.17	KC1	Knee articular cartilage damage
THIGH	Bursitis	Ischial bursitis	TH.44.31	TTH	Hamstring tendinopathy with ischial bursitis
THIGH	Laceration	Thigh laceration	TH.60.25	TKX	Thigh Laceration/ Abrasion
THIGH	Abrasion	Thigh abrasion	TH.60.26	TKX	Thigh Laceration/ Abrasion
THIGH	Injury without tissue type specified	Other thigh injury	TH.90.00	TZ1	Thigh pain/ Injury Not otherwise specified
THIGH	Stump injury	trans-femoral amputation stump hematoma	TH.91.23	TWS	Stump trauma thigh
THIGH	Stump injury	trans-femoral amputation stump contusion	TH.91.24	TWS	Stump trauma thigh
THIGH	Stump injury	trans-femoral amputation stump laceration	TH.91.25	TWS	Stump trauma thigh
THIGH	Stump injury	trans-femoral amputation stump maceration	TH.91.26	TWS	Stump trauma thigh
THIGH	Stump injury	trans-femoral amputation stump bursitis	TH.91.31	TWS	Stump trauma thigh
THIGH	Stump injury	trans-femoral amputation stump neuroma	TH.91.41	TWS	Stump trauma thigh
THIGH	Stump injury	trans-femoral amputation stump pain (including phantom pain)	TH.91.42	TWS	Stump trauma thigh
KNEE	Tendinopathy	Biceps Femoris tendinopathy	KN.11.28	KTB	Lateral hamstring insertion tendonitis
KNEE	Tendinopathy	Pes anserine tendinopathy	KN.12.28	KTS	Medial hamstring insertion tendonitis/pes anserinus bursitis
KNEE	Tendinopathy	Iliotibial band friction syndrome	KN.13.28	KT1	Iliotibial band syndrome
KNEE	Tendon Rupture	Patellar tendon tear/rupture	KN.14.09	KR1	Patellar tendon rupture
KNEE	Tendinopathy	Patellar tendinopathy	KN.14.28	KT2	Patellar tendinopathy
KNEE	Tendinopathy	Patellar tendon cystic degeneration	KN.14.33	KTP	Patellar Tendon Injury
KNEE	Tendon Rupture	Quadriceps tendon tear/rupture	KN.15.09	KRQ	Quadriceps tendon rupture
KNEE	Tendinopathy	Quadriceps tendinopathy	KN.15.28	KT7	Quadriceps tendinopathy +/- suprapatellar bursitis
KNEE	Tendinopathy	Popliteus tendinopathy	KN.16.28	KT5	Popliteus tendinopathy/strain
KNEE	Peripheral nerve injury	Knee reflex sympathetic dystrophy	KN.20.43	KZ1	Knee Pain/ Injury Not otherwise specified
KNEE	Peripheral nerve injury	Saphenous neuroma	KN.21.41	MRBXK	Tumour knee
KNEE	Fracture	Intrarticular fracture of femur	KN.32.13	KF2	Intraarticular femoral fracture
KNEE	Fracture	Tibial plateau fracture	KN.33.13	KFI	Intraarticular tibial fracture
KNEE	Fracture	Tibial spine avulsion	KN.33.14	KFT	Proximal tibial fracture
KNEE	Physis injury	Osgood-Schlatter's Disease	KN.33.20	KGO	Osgood-Schlatter syndrome
KNEE	Avascular necrosis	Femoral osteonecrosis	KN.33.35	KZ1	Knee Pain/ Injury Not otherwise specified
KNEE	Fracture	Fibular head fracture	KN.34.13	QFH	Fractured proximal fibula
KNEE	Fracture	Patellar fracture	KN.35.13	KF1	Patella fracture
KNEE	Fracture	Patellar avulsion fracture	KN.35.14	KF1	Patella fracture
KNEE	Physis injury	Sinding-Larson-Johanson Syndrome	KN.35.20	KGS	Apophysitis/ avulsion fracture distal pole patella (SLJ)
KNEE	Injury without tissue type specified	Bipartite or multipartite patella	KN.35.42	MRJPK	Bi or multipartite patella
KNEE	Injury without tissue type specified	Patella alta	KN.36.42	MRCXK
KNEE	Injury without tissue type specified	Patella infera	KN.37.42	MRCXK
KNEE	Cartilage	Loose body of knee	KN.40.21	KCL	Knee cartilage injury with loose bodies
KNEE	Synovitis / capsulitis	Knee synovitis	KN.40.30	KQS	Knee Joint synovitis
KNEE	Arthritis	Knee generalized osteoarthritis	KN.40.34	KA1	Knee osteoarthritis
KNEE	Synovitis / capsulitis	Baker's Cyst	KN.41.23	KQB	Baker's cyst
KNEE	Synovitis / capsulitis	Arthrofibrosis	KN.41.30	KZ1	Knee Pain/ Injury Not otherwise specified
KNEE	Bursitis	Knee bursitis - prepatellar, infrapatellar, pes anserine	KN.41.31	KBI	Infrapatella fat pad contusion/haematoma +/- bursitis
KNEE	Cartilage	Patellofemoral chondromalacia	KN.42.21	KCU	Patellofemoral osteochondral injury
KNEE	Cartilage	Post-traumatic patellofemoral pain	KN.42.33	KCP	Patellofemoral jt chondral pain
KNEE	Arthritis	Patellofemoral osteoarthritis	KN.42.34	KAP	Patellofemoral osteoarthritis
KNEE	Cartilage	Patellofemoral osteochondritis dissecans (OCD)	KN.42.37	KC7	OCD Patella
KNEE	Cartilage	Lateral hyperpressure syndrome	KN.42.38	KP4	Knee Impingement/ Synovitis/ Biomechanical Lesion not associated with other conditions
KNEE	Cartilage	Patellofemoral pain syndrome	KN.42.42	KCP	Patellofemoral jt chondral pain
KNEE	Arthritis	Unicompartmental osteoarthritis	KN.43.34	KAL	Lateral compartment osteoarthritis knee
KNEE	Cartilage	Femoral osteochondritis dissecans (OCD)	KN.43.37	KCO	OCD Medial or lateral femoral condyle
KNEE	Arthritis	Proximal tibio-fibular degenerative arthritis	KN.44.34	KA1	Knee osteoarthritis
KNEE	Cartilage	Patellar osteochondral fracture	KN.45.17	KCU	Patellofemoral osteochondral injury
KNEE	Cartilage	Medial meniscal tear	KN.45.21	KC2	Medial meniscal tear
KNEE	Cartilage	Lateral meniscal tear	KN.46.21	KC3	Lateral meniscal tear
KNEE	Synovitis / capsulitis	Fat pad syndrome / plica	KN.47.30	KQH	Hoffa's fat pad impingement
KNEE	Injury without tissue type specified	Pelligrini-Steida Syndrome	KN.50.33	KLS	Complication post MCL strain/ rupture incl Pellegrini Steida lesion
KNEE	Joint Sprain	Medial collateral ligament 1° sprain- acute	KN.51.01	KLV	Grade 1 MCL tear knee
KNEE	Joint Sprain	Medial collateral ligament 2° sprain- acute	KN.51.02	KLW	Grade 2 MCL tear knee
KNEE	Joint Sprain	Medial collateral ligament 3° sprain- acute	KN.51.03	KLM	MCL rupture knee
KNEE	Joint Sprain	Medial collateral ligament 1° sprain- chronic	KN.51.04	KUM	Chronic MCL insufficiency
KNEE	Joint Sprain	Medial collateral ligament 2° sprain- chronic	KN.51.05	KUM	Chronic MCL insufficiency
KNEE	Joint Sprain	Medial collateral ligament 3° sprain- chronic	KN.51.06	KUM	Chronic MCL insufficiency
KNEE	Joint Sprain	Lateral collateral ligament 1° sprain- acute	KN.52.01	KL4	LCL strain/ rupture
KNEE	Joint Sprain	Lateral collateral ligament 2° sprain- acute	KN.52.02	KL4	LCL strain/ rupture
KNEE	Joint Sprain	Lateral collateral ligament 3° sprain- acute	KN.52.03	KL4	LCL strain/ rupture
KNEE	Joint Sprain	Lateral collateral ligament 1° sprain- chronic	KN.52.04	KL4	LCL strain/ rupture
KNEE	Joint Sprain	Lateral collateral ligament 2° sprain- chronic	KN.52.05	KL4	LCL strain/ rupture
KNEE	Joint Sprain	Lateral collateral ligament 3° sprain- chronic	KN.52.06	KL4	LCL strain/ rupture
KNEE	Joint Sprain	Anterior cruciate ligament partial tear- acute	KN.53.02	KLI	Partial ACL tear
KNEE	Joint Sprain	Anterior cruciate ligament complete tear- acute	KN.53.03	KLA	ACL rupture
KNEE	Joint Sprain	Anterior cruciate ligament partial tear- chronic	KN.53.05	KU1	Chronic ACL insufficiency
KNEE	Joint Sprain	Anterior cruciate ligament complete tear- chronic	KN.53.06	KU1	Chronic ACL insufficiency
KNEE	Joint Sprain	Anterior cruciate ligament graft rupture	KN.53.09	KLG	ACL graft rupture
KNEE	Joint Sprain	Posterior cruciate ligament partial tear- acute	KN.54.02	KLQ	Partial PCL tear
KNEE	Joint Sprain	Posterior cruciate ligament complete tear- acute	KN.54.03	KLS	Complication post MCL strain/ rupture incl Pellegrini Steida lesion
KNEE	Joint Sprain	Posterior cruciate ligament partial tear- chronic	KN.54.05	KUP	Chronic PCL insufficiency
KNEE	Joint Sprain	Posterior cruciate ligament complete tear- chronic	KN.54.06	KUP	Chronic PCL insufficiency
KNEE	Joint Sprain	Patellofemoral dislocation	KN.55.10	KD1	Dislocated patella
KNEE	Joint Sprain	Patellofemoral subluxation	KN.55.11	KD1	Dislocated patella
KNEE	Chronic Instability	Patellofemoral functional instability	KN.55.12	KU2	Patellar instability
KNEE	Joint Sprain	Tibial-femoral dislocation	KN.56.10	KDK	Knee dislocation
KNEE	Chronic Instability	Tibial-femoral Functional Instability	KN.56.12	KUX	Knee Instability ( chronic or recurrent subluxations)
KNEE	Joint Sprain	Proximal tibio-fibular dislocation	KN.57.10	KDT	Superior tib fib joint dislocation
KNEE	Joint Sprain	Proximal tibio-fibular subluxation	KN.57.11	KDT	Superior tib fib joint dislocation
KNEE	Contusion (superficial)	Knee contusion	KN.60.24	KV1	Knee contusion/haematoma (extraarticular)
KNEE	Laceration	Knee laceration	KN.60.25	KK1	Lacerated knee
KNEE	Abrasion	Knee abrasion	KN.60.26	KK1	Lacerated knee
KNEE	Injury without tissue type specified	Other knee injury	KN.90.00	KZ1	Knee Pain/ Injury Not otherwise specified
KNEE	Stump injury	knee disarticulation stump hematoma	KN.91.23	KWS	Stump trauma knee
KNEE	Stump injury	knee disarticulation stump contusion	KN.91.24	KWS	Stump trauma knee
KNEE	Stump injury	knee disarticulation stump laceration	KN.91.25	KWS	Stump trauma knee
KNEE	Stump injury	knee disarticulation stump maceration	KN.91.26	KWS	Stump trauma knee
KNEE	Stump injury	knee disarticulation stump bursitis	KN.91.31	KWS	Stump trauma knee
KNEE	Stump injury	knee disarticulation stump neuroma	KN.91.41	KWS	Stump trauma knee
KNEE	Stump injury	knee disarticulation stump pain (including phantom pain)	KN.91.42	KWS	Stump trauma knee
LOWER LEG	Muscle Injury	Other leg muscle strain	LE.10.07	QMX	Lower leg muscle Injury
LOWER LEG	Muscle compartment syndrome	Anterior exertional compartment syndrome	LE.10.36	QYA	Anterior compartment syndrome
LOWER LEG	Muscle Injury	Gastrocnemius strain	LE.11.07	QM1	Gastrocnemius muscle injury/ strain
LOWER LEG	Muscle Injury	Gastrocnemius spasm	LE.11.08	QM1	Gastrocnemius muscle injury/ strain
LOWER LEG	Muscle Injury	Gastrocemius Tear/Rupture	LE.11.09	QM1	Gastrocnemius muscle injury/ strain
LOWER LEG	Muscle Injury	Gastrocnemius cyst	LE.11.22	QM1	Gastrocnemius muscle injury/ strain
LOWER LEG	Muscle compartment syndrome	Lateral exertional compartment syndrome	LE.11.36	QYL	Lateral ( peroneal) compartment syndrome
LOWER LEG	Muscle Injury	Soleus strain	LE.12.07	QMS	Soleus muscle strain
LOWER LEG	Muscle Injury	Soleus spasm	LE.12.08	QMS	Soleus muscle strain
LOWER LEG	Muscle compartment syndrome	Acute compartment syndrome	LE.12.36	QYF	Other acute compartment syndrome to lower leg
LOWER LEG	Muscle Injury	Tibialis posterior strain	LE.13.07	QMP	Tibialis posterior strain
LOWER LEG	Muscle compartment syndrome	Deep posterior exertional compartment syndrome	LE.13.36	QYD	Deep posterior compartment syndrome
LOWER LEG	Muscle Injury	Tibialis anterior strain	LE.14.07	ATE	Extensor tendon injuries at ankle
LOWER LEG	Muscle Injury	Tibialis anterior tendon rupture	LE.14.09	ATE	Extensor tendon injuries at ankle
LOWER LEG	Muscle Injury	Peroneus strain	LE.15.07	QMX	Lower leg muscle Injury
LOWER LEG	Tendon Rupture	Achilles tendon rupture	LE.16.09	QRA	Achilles tendon rupture
LOWER LEG	Tendinopathy	Achilles tendinopathy	LE.16.28	QTA	Achilles tendinopathy
LOWER LEG	Tendinopathy	Achilles tenosynovitis	LE.16.29	QTA	Achilles tendinopathy
LOWER LEG	Tendinopathy	Achilles tendon cystic degeneration	LE.16.33	QTA	Achilles tendinopathy
LOWER LEG	Muscle compartment syndrome	Superficial posterior exertional compartment syndrome	LE.17.36	QYP	Posterior compartment syndrome
LOWER LEG	Peripheral nerve injury	Leg reflex sympathetic dystrophy	LE.20.43	QZ1	Other Lower Leg Pain/ Injury not otherwise specified
LOWER LEG	Peripheral nerve injury	Common peroneal nerve injury	LE.21.39	QNX	Neurological Injury of Lower Leg
LOWER LEG	Peripheral nerve injury	Superficial peroneal nerve injury/Entrapment	LE.22.39	QNX	Neurological Injury of Lower Leg
LOWER LEG	Peripheral nerve injury	Deep peroneal nerve injury	LE.23.39	QNX	Neurological Injury of Lower Leg
LOWER LEG	Peripheral nerve injury	Sural nerve entrapment	LE.24.39	QNX	Neurological Injury of Lower Leg
LOWER LEG	Fracture	Tibial fracture	LE.32.13	QFO	Fractured midshaft tibia
LOWER LEG	Fracture	Tibial fracture- non-union	LE.32.15	QFQ	Fractured tibia +/- fibula with other complication ( e.g. compartment syndrome)
LOWER LEG	Bone stress injury	Tibial stress fracture	LE.32.18	QST	Stress fracture tibia
LOWER LEG	Fracture	Tibial greenstick fracture	LE.32.19	QFX	Lower Leg Fractures
LOWER LEG	Bone stress injury	Tibial periostitis	LE.32.32	QYB	Tenoperiostitis of lower leg
LOWER LEG	Bone stress injury	Medial tibial stress syndrome	LE.32.42	QT1	Medial Tibial Stress Syndrome ('shin splints')
LOWER LEG	Fracture	Fibular fracture	LE.33.13	QFF	Fractured fibula
LOWER LEG	Bone stress injury	Fibular stress fracture	LE.33.18	QS2	Stress fracture fibula
LOWER LEG	Fracture	Fibular greenstick fracture	LE.33.19	QFF	Fractured fibula
LOWER LEG	Bone stress injury	Fibular periostitis	LE.33.32	QYB	Tenoperiostitis of lower leg
LOWER LEG	Contusion (superficial)	Leg contusion	LE.60.24	QH1	Leg Soft Tissue Bruising/ Haematoma
LOWER LEG	Laceration	Leg laceration	LE.60.25	QK1	Lower Leg Laceration
LOWER LEG	Abrasion	Leg abrasion	LE.60.26	QK1	Lower Leg Laceration
LOWER LEG	Vascular trauma	Popliteal artery entrapment	LE.71.45	QV4	Popliteal artery entrapment
LOWER LEG	Injury without tissue type specified	Other leg injury	LE.90.00	QZ1	Other Lower Leg Pain/ Injury not otherwise specified
LOWER LEG	Stump injury	trans-tibial (below knee) amputation stump hematoma	LE.91.23	QWS	Stump trauma lower limb
LOWER LEG	Stump injury	trans-tibial (below knee) amputation stump contusion	LE.91.24	QWS	Stump trauma lower limb
LOWER LEG	Stump injury	trans-tibial (below knee) amputation stump laceration	LE.91.25	QWS	Stump trauma lower limb
LOWER LEG	Stump injury	trans-tibial (below knee) amputation stump maceration	LE.91.26	QWS	Stump trauma lower limb
LOWER LEG	Stump injury	trans-tibial (below knee) amputation stump bursitis	LE.91.31	QWS	Stump trauma lower limb
LOWER LEG	Stump injury	trans-tibial (below knee) amputation stump neuroma	LE.91.41	QWS	Stump trauma lower limb
LOWER LEG	Stump injury	trans-tibial (below knee) amputation stump pain (including phantom pain)	LE.91.42	QWS	Stump trauma lower limb
ANKLE	Tendon Rupture	Ankle extensor tendon rupture	AN.11.09	ATE	Extensor tendon injuries at ankle
ANKLE	Tendinopathy	Ankle extensor tendinopathy	AN.11.28	ATE	Extensor tendon injuries at ankle
ANKLE	Tendinopathy	Ankle extensor tenonsynovitis (including lace bite)	AN.11.29	AT5	Tibialis anterior tenosynovitis
ANKLE	Tendinopathy	Flexor hallucis longus tendinopathy	AN.12.28	AT7	Flexor Hallucis Longus tendinopathy
ANKLE	Tendon Rupture	Tibialis posterior tendon rupture	AN.13.09	ARP	Tibialias posterior tendon rupture
ANKLE	Tendinopathy	Tibialis posterior tendinopathy	AN.13.28	FT7	Tibialis posterior tendinopathy
ANKLE	Tendinopathy	Tibialis anterior tendinopathy	AN.14.28	AT5	Tibialis anterior tenosynovitis
ANKLE	Tendon Rupture	Peroneus tendon rupture	AN.15.09	FR1	Peroneal tendon rupture
ANKLE	Tendinopathy	Peroneus tendon subluxation	AN.15.11	ATP	Peroneal tendon subluxation/ dislocation
ANKLE	Tendinopathy	Peroneus tendinopathy	AN.15.28	AT6	Peroneal tendinopathy
ANKLE	Peripheral nerve injury	Ankle neuroma	AN.20.41	ANX	Nerve Injury at Ankle
ANKLE	Peripheral nerve injury	Ankle reflex sympathetic dystrophy	AN.20.43	AP2	Functional pain ankle
ANKLE	Peripheral nerve injury	Tarsal tunnel syndrome	AN.21.39	ANT	Tarsal tunnel syndrome
ANKLE	Fracture	Ankle fracture -Misc	AN.30.13	AF1	Fracture ankle
ANKLE	Fracture	Medial Malleolus fracture	AN.32.13	AFM	Medial malleolus fracture
ANKLE	Fracture	Medial Malleolus avulsion fracture	AN.32.14	ALJ	Ankle Sprains
ANKLE	Physis injury	Medial Malleolus growth plate / physeal injury	AN.32.20	AFM	Medial malleolus fracture
ANKLE	Bone contusion	Medial Malleolus contusion	AN.32.24	AV1	Ankle contusion/haematoma
ANKLE	Fracture	Lateral Malleolus fracture	AN.33.13	AFL	Lateral malleolus fracture
ANKLE	Fracture	Lateral Malleolus avulsion fracture	AN.33.14	ALR	Lateral ligaments rupture ( grade 3 injury)
ANKLE	Physis injury	Lateral Malleolus growth plate / physeal injury	AN.33.20	AFL	Lateral malleolus fracture
ANKLE	Bone contusion	Lateral Malleolus contusion	AN.33.24	AV1	Ankle contusion/haematoma
ANKLE	Fracture	Talus fracture	AN.34.13	AF2	Fractured talus
ANKLE	Bone stress injury	Talus stress fracture	AN.34.18	AS1	Stress fracture talus
ANKLE	Bone contusion	Talar dome contusion	AN.34.24	AJT	Talar dome bone bruise
ANKLE	Bone stress injury	Os Trigonum / Steida process syndrome	AN.34.33	AQP	Posterior impingement ankle
ANKLE	Avascular necrosis	Talus avascular necrosis	AN.34.35	AZ1	Ankle Pain/ Injury undiagnosed
ANKLE	Arthritis	Ankle degenerative/ostoearthritis	AN.40.34	AA1	Ankle joint osteoarthritis
ANKLE	Cartilage	Talus osteochondral fracture	AN.41.17	AC1	Ankle Osteochondral Injuries
ANKLE	Synovitis / capsulitis	Anterior ankle impingement	AN.42.30	AQA	Ankle anterior impingement
ANKLE	Synovitis / capsulitis	Posterior ankle impingement	AN.43.30	AQP	Posterior impingement ankle
ANKLE	Bursitis	Medial malleolus Bursitis	AN.44.31	QBX	Bursitis not otherwise specified
ANKLE	Bursitis	Lateral malleolus Bursitis	AN.45.31	QBX	Bursitis not otherwise specified
ANKLE	Chronic Instability	Ankle functional instability	AN.50.12	AUX	Chronic Ankle Instability
ANKLE	Joint Sprain	Deltoid ligament 1° sprain -acute	AN.51.01	AL2	Sprain medial collateral (deltoid) ligament ankle
ANKLE	Joint Sprain	Deltoid ligament 2° sprain -acute	AN.51.02	AL2	Sprain medial collateral (deltoid) ligament ankle
ANKLE	Joint Sprain	Deltoid ligament 3° sprain -acute	AN.51.03	AL2	Sprain medial collateral (deltoid) ligament ankle
ANKLE	Joint Sprain	Deltoid ligament 1° sprain -chronic	AN.51.04	AUM	Chronic medial instability
ANKLE	Joint Sprain	Deltoid ligament 2° sprain -chronic	AN.51.05	AUM	Chronic medial instability
ANKLE	Joint Sprain	Deltoid ligament 3° sprain -chronic	AN.51.06	AUM	Chronic medial instability
ANKLE	Joint Sprain	Lateral ligament complex 1° sprain -acute	AN.52.01	ALR	Lateral ligaments rupture ( grade 3 injury)
ANKLE	Joint Sprain	Lateral ligament complex 2° sprain -acute	AN.52.02	ALR	Lateral ligaments rupture ( grade 3 injury)
ANKLE	Joint Sprain	Lateral ligament complex 3° sprain -acute	AN.52.03	ALR	Lateral ligaments rupture ( grade 3 injury)
ANKLE	Joint Sprain	Lateral ligament complex 1° sprain -chronic	AN.52.04	AU1	Chronic lateral instability
ANKLE	Joint Sprain	Lateral ligament complex 2° sprain -chronic	AN.52.05	AU1	Chronic lateral instability
ANKLE	Joint Sprain	Lateral ligament complex 3° sprain -chronic	AN.52.06	AU1	Chronic lateral instability
ANKLE	Joint Sprain	Anterior talofibular ligament 1° sprain -acute	AN.53.01	ALA	Anterior talofibular ligament sprain
ANKLE	Joint Sprain	Anterior talofibular ligament 2° sprain -acute	AN.53.02	ALA	Anterior talofibular ligament sprain
ANKLE	Joint Sprain	Anterior talofibular ligament 3° sprain -acute	AN.53.03	ALA	Anterior talofibular ligament sprain
ANKLE	Joint Sprain	Anterior talofibular ligament 1° sprain -chronic	AN.53.04	ALA	Anterior talofibular ligament sprain
ANKLE	Joint Sprain	Anterior talofibular ligament 2° sprain -chronic	AN.53.05	ALA	Anterior talofibular ligament sprain
ANKLE	Joint Sprain	Anterior talofibular ligament 3° sprain -chronic	AN.53.06	ALA	Anterior talofibular ligament sprain
ANKLE	Joint Sprain	Calcaneofibular ligament 1° sprain -acute	AN.54.01	ALC	Calcaneofibular ligament sprain
ANKLE	Joint Sprain	Calcaneofibular ligament 2° sprain -acute	AN.54.02	ALC	Calcaneofibular ligament sprain
ANKLE	Joint Sprain	Calcaneofibular ligament 3° sprain -acute	AN.54.03	ALC	Calcaneofibular ligament sprain
ANKLE	Joint Sprain	Calcaneofibular ligament 1° sprain -chronic	AN.54.04	ALC	Calcaneofibular ligament sprain
ANKLE	Joint Sprain	Calcaneofibular ligament 2° sprain -chronic	AN.54.05	ALC	Calcaneofibular ligament sprain
ANKLE	Joint Sprain	Calcaneofibular ligament 3° sprain -chronic	AN.54.06	ALC	Calcaneofibular ligament sprain
ANKLE	Joint Sprain	Posterior talofibular ligament 1° sprain -acute	AN.55.01	AL1	Sprain lateral collateral ligament ankle
ANKLE	Joint Sprain	Posterior talofibular ligament 2° sprain -acute	AN.55.02	AL1	Sprain lateral collateral ligament ankle
ANKLE	Joint Sprain	Posterior talofibular ligament 3° sprain -acute	AN.55.03	AL1	Sprain lateral collateral ligament ankle
ANKLE	Joint Sprain	Posterior talofibular ligament 1° sprain -chronic	AN.55.04	AL1	Sprain lateral collateral ligament ankle
ANKLE	Joint Sprain	Posterior talofibular ligament 2° sprain -chronic	AN.55.05	AL1	Sprain lateral collateral ligament ankle
ANKLE	Joint Sprain	Posterior talofibular ligament 3° sprain -chronic	AN.55.06	AL1	Sprain lateral collateral ligament ankle
ANKLE	Joint Sprain	Tibiofibular ligament syndesmosis (high ankle) 1° sprain -acute	AN.56.01	ALS	Inferior tibiofibular syndesmosis sprain
ANKLE	Joint Sprain	Tibiofibular ligament syndesmosis (high ankle) 2° sprain -acute	AN.56.02	ALS	Inferior tibiofibular syndesmosis sprain
ANKLE	Joint Sprain	Tibiofibular Diastasis	AN.56.09	ALS	Inferior tibiofibular syndesmosis sprain
ANKLE	Laceration	Ankle laceration	AN.60.25	AKX	Ankle Laceration/ Abrasion
ANKLE	Abrasion	Ankle abrasion	AN.60.26	AKX	Ankle Laceration/ Abrasion
ANKLE	Injury without tissue type specified	Other ankle injury	AN.90.00	AZ1	Ankle Pain/ Injury undiagnosed
ANKLE	Contusion (superficial)	Ankle contusion	AN.90.24	AV1	Ankle contusion/haematoma
ANKLE	Stump injury	ankle disarticulation stump hematoma	AN.91.23
ANKLE	Stump injury	ankle disarticulation stump contusion	AN.91.24
ANKLE	Stump injury	ankle disarticulation stump laceration	AN.91.25
ANKLE	Stump injury	ankle disarticulation stump maceration	AN.91.26
ANKLE	Stump injury	ankle disarticulation stump bursitis	AN.91.31
ANKLE	Stump injury	ankle disarticulation stump neuroma	AN.91.41
ANKLE	Stump injury	ankle disarticulation stump pain (including phantom pain)	AN.91.42
FOOT	Muscle Injury	Extensor digitorum brevis strain	FO.11.07	FM1	Foot Muscle Strain/ Spasm/ trigger Points
FOOT	Muscle contusion	Extensor digitorum brevis contusion	FO.11.24	FM1	Foot Muscle Strain/ Spasm/ trigger Points
FOOT	Muscle Injury	Intrinsic plantar muscle strain	FO.12.07	FM1	Foot Muscle Strain/ Spasm/ trigger Points
FOOT	Tendinopathy	Plantar fasciitis	FO.13.33	FT1	Plantar heel pain (fasciitis/strain/calcaneal spur)
FOOT	Peripheral nerve injury	Morton's neuroma / interdigital neuroma	FO.21.41	FN1	Morton's neuroma or Joplin's neuritis
FOOT	Peripheral nerve injury	Plantar nerve injury	FO.22.39	FNX	Foot Neurological Injury
FOOT	Fracture	Calcaneal fracture	FO.31.13	FFC	Fractured calcaneus
FOOT	Bone stress injury	Calcaneal stress fracture	FO.31.18	FSC	Stress fracture calcaneus
FOOT	Physis injury	Calcaneal apohysitis/ Sever's disease	FO.31.20	AGC	Apophysitis/ avulsion fracture to calcaneus ( Severs Dx)
FOOT	Bone stress injury	Pump bumps	FO.31.32	QBC	Calcaneal bursitis (pump bump)
FOOT	Bone stress injury	Heel spur	FO.31.33	FZX	Foot Pain/ Injury Not otherwise specified
FOOT	Fracture	Cuboid fracture	FO.32.13	FF1	Fracture cuboid
FOOT	Bone stress injury	Cuboid stress fracture	FO.32.18	FSD	Cuboid stress fracture
FOOT	Fracture	Navicular fracture	FO.33.13	FFN	Fracture navicular
FOOT	Fracture	Navicular fracture- non-union	FO.33.15	FEN	Non union navicular stress fracture
FOOT	Bone stress injury	Navicular stress fracture	FO.33.18	FSN	Navicular stress fracture
FOOT	Injury without tissue type specified	Accessory navicular	FO.33.23	MRJFF	Accessory bone foot
FOOT	Avascular necrosis	Navicular avascular necrosis	FO.33.35	FEN	Non union navicular stress fracture
FOOT	Fracture	Cuneiform fracture	FO.34.13	FFF	Fracture cuneiform
FOOT	Bone stress injury	Cuneiform stress fracture	FO.34.18	FSF	Cuneiform stress fracture
FOOT	Fracture	First metatarsal fracture	FO.35.13	FFM	Fracture 1st Metatarsal
FOOT	Fracture	Metatarsal fracture (2-4)	FO.36.13	FF2	Fractured metatarsal(s)
FOOT	Bone stress injury	Metatarsal stress fracture	FO.36.18	FS2	Stress fracture metatarsal
FOOT	Avascular necrosis	Freiberg's infarction	FO.36.35	FGF	Freiberg's disease - osteochondrosis of MT head
FOOT	Fracture	5th metatarsal fracture/ Jones' fracture	FO.37.13	FF5	Fracture 5th metatarsal shaft
FOOT	Fracture	Styloid process avulsion fracture	FO.37.14	FFB	Avulsion fracture 5th metatarsal base
FOOT	Fracture	Sesmoid fracture	FO.38.13	FS3	Sesamoiditis/ stress fracture
FOOT	Bone stress injury	Sesmoid stress fracture	FO.38.18	FST	Sesamoid stress fracture
FOOT	Bone stress injury	Sesamoiditis	FO.38.33	FS3	Sesamoiditis/ stress fracture
FOOT	Bone stress injury	Bipartite sesmoids	FO.38.42	MRCXF
FOOT	Fracture	Phalyngeal fracture- toes	FO.39.13	FF3	Fractured phalanx (foot)
FOOT	Synovitis / capsulitis	Tarsal Coalition	FO.41.30	MRJUF	Tarsal Coalition of foot
FOOT	Synovitis / capsulitis	Fat pad contusion	FO.42.24	FV3	Heel bruising/ haematoma incl fat pad contusion
FOOT	Synovitis / capsulitis	Tarsal-metatarsal hypomobility	FO.42.30	FA2	Arthritis of midfoot
FOOT	Synovitis / capsulitis	Hallux rigidus	FO.43.30	FAH	Arthritis MTP joint great toe/Hallux Rigidus
FOOT	Synovitis / capsulitis	Turf toe	FO.44.30	FLT	Sprained toe/'turf toe'
FOOT	Arthritis	Metatarsophalangeal joint osteoarthritis	FO.45.34	FAT	Arthritis of lesser toes
FOOT	Cartilage	Osteochondritis / Kohler's disease	FO.46.37	FC1	Osteochondrosis of foot
FOOT	Joint Sprain	Subtalar dislocation	FO.51.10	FDX	Foot Dislocation
FOOT	Joint Sprain	Cuboid subluxation	FO.52.11	FT6	Cuboid Syndrome
FOOT	Joint Sprain	First MTP joint dislocation	FO.53.10	FD2	Dislocation of great toe MTP jt
FOOT	Joint Sprain	2nd, 3, 4, 5th MTP joint disolcation	FO.54.10	FDM	Dislocation of lesser toe MTP joint
FOOT	Joint Sprain	Midfoot sprain	FO.55.01	FL1	Midfoot joint/ ligament sprain
FOOT	Joint Sprain	Lisfranc injury	FO.56.03	FDT	Dislocation of midfoot through TMT joints
FOOT	Contusion (superficial)	Foot contusion	FO.60.24	FV1	Foot contusion/haematoma
FOOT	Laceration	Foot laceration	FO.60.25	FIA	Foot abrasion
FOOT	Abrasion	Foot abrasion	FO.60.26	FIA	Foot abrasion
FOOT	Injury without tissue type specified	Other toe nail injury	FO.80.00	FV2	Toenail problem/contusion/haematoma
FOOT	Contusion (superficial)	Subungal hematoma	FO.80.24	FV1	Foot contusion/haematoma
FOOT	Injury without tissue type specified	Ingrown Toenail	FO.80.33	FIN	Skin infection toenail - incl infected ingrown toenail
FOOT	Abrasion	Lace syndrome	FO.81.33	FZX	Foot Pain/ Injury Not otherwise specified
FOOT	Abrasion	Foot blister	FO.83.27	FIA	Foot abrasion
FOOT	Abrasion	Great toe blister	FO.84.27	FIA	Foot abrasion
FOOT	Abrasion	Other toe blister	FO.85.27	FIA	Foot abrasion
FOOT	Injury without tissue type specified	Other foot injury	FO.90.00	FZX	Foot Pain/ Injury Not otherwise specified
FOOT	Injury without tissue type specified	Metatarsalgia	FO.90.42	FSR	Stress rxn metatarsal/ metatarsalgia
FOOT	Stump injury	partial foot amputation stump hematoma	FO.91.23
FOOT	Stump injury	partial foot amputation stump contusion	FO.91.24
FOOT	Stump injury	partial foot amputation stump laceration	FO.91.25
FOOT	Stump injury	partial foot amputation stump maceration	FO.91.26
FOOT	Stump injury	partial foot amputation stump bursitis	FO.91.31
FOOT	Stump injury	partial foot amputation stump neuroma	FO.91.41
FOOT	Stump injury	partial foot amputation stump pain (including phantom pain)	FO.91.42	MRCXF
FOOT	Injury without tissue type specified	Hyperpronation / pes planus	FO.91.42	MRCXF
FOOT	Injury without tissue type specified	Excessive supination / pes cavus	FO.92.42	MRCXF
FOOT	Injury without tissue type specified	Sinus Tarsi Syndrome	FO.93.42	FQ3	Sinus tarsi syndrome (subtalar jt synovitis)
FOOT	Injury without tissue type specified	Fat pad Syndrome	FO.94.42	FH3	Fat pad contusion heel
FOOT	Injury without tissue type specified	Hallux valgus / bunion	FO.95.42	FA1	Bunion of great toe MTP joint
FOOT	Injury without tissue type specified	5th MTP bunionette	FO.96.42	FAF	Bunion 5th MTP joint
NON-SPECIFIC INJURY	Contusion (superficial)	Contusion	OO.60.24
NON-SPECIFIC INJURY	Laceration	Skin laceration - other	OO.60.25	XKX	Laceration/ Abrasion Location Unspecified or Crossing Anatomical Boundaries
NON-SPECIFIC INJURY	Abrasion	Skin abrasion	OO.60.26	XKX	Laceration/ Abrasion Location Unspecified or Crossing Anatomical Boundaries
NON-SPECIFIC INJURY	Abrasion	Callus, corn	OO.60.27	MDYX	Rash / other dermatological condition
NON-SPECIFIC INJURY	Injury without tissue type specified	Non-Specific Injury	OO.90.00
NON-SPECIFIC INJURY	Injury without tissue type specified	Multiple trauma (major)	OO.91.00
NON-SPECIFIC INJURY	Stump injury	Upper extremity stump injury	OO.91.44
NON-SPECIFIC INJURY	Injury without tissue type specified	Multiple MSK injuries	OO.92.00
NON-SPECIFIC INJURY	Stump injury	Lower extremity stump injury	OO.92.44
CARDIOVASCULAR	Immunological / Inflammatory	Myocarditis	CV.01.74	MCZX	Other cardiovascular disease
CARDIOVASCULAR	Thrombotic / hemorrhagic	Cephalic venous insufficiency	CV.01.78	MCVX	Venous disease
CARDIOVASCULAR	Degenerative or chronic	Hypertrophic and other cardiomyopathy	CV.01.79	MCEH	HOCM
CARDIOVASCULAR	Unknown or not specified	Other cardiovascular illness / disorder	CV.01.83	MCZX	Other cardiovascular disease
CARDIOVASCULAR	Immunological / Inflammatory	Pericarditis	CV.02.74	MCZX	Other cardiovascular disease
CARDIOVASCULAR	Thrombotic / hemorrhagic	Deep vein thrombosis	CV.02.78	MCVD	Deep venous thrombosis
CARDIOVASCULAR	Degenerative or chronic	Angina Syndrome	CV.02.79	MCVI	Ischaemic heart disease
CARDIOVASCULAR	Unknown or not specified	Sudden Cardiac Death	CV.02.83	MCZX	Other cardiovascular disease
CARDIOVASCULAR	Thrombotic / hemorrhagic	Leg thrombosis/atherosclerosis	CV.03.78	MCCP	Peripheral vascular disease
CARDIOVASCULAR	Degenerative or chronic	Hypertension	CV.03.79	MCZX	Other cardiovascular disease
CARDIOVASCULAR	Unknown or not specified	Athletic Heart Syndrome	CV.03.83	MCVA	Athletes heart
CARDIOVASCULAR	Thrombotic / hemorrhagic	Varicose veins - leg	CV.04.78	MCVV	Varicose veins
CARDIOVASCULAR	Unknown or not specified	Arrythmia - Dysrythmia	CV.04.83	MCZC	Heart arrhythmia/conduction abnormality
CARDIOVASCULAR	Thrombotic / hemorrhagic	Leg deep vein thrombosis	CV.05.78	MCVD	Deep venous thrombosis
CARDIOVASCULAR	Unknown or not specified	Autonomic Dysfunction (syncope)	CV.05.83	MCZX	Other cardiovascular disease
CARDIOVASCULAR	Thrombotic / hemorrhagic	Axillary artery thrombosis	CV.06.78	MCVX	Venous disease
CARDIOVASCULAR	Thrombotic / hemorrhagic	Leg venous insufficiency	CV.06.78	MCVX	Venous disease
CARDIOVASCULAR	Unknown or not specified	Aortic Valve disease	CV.06.83	MCCV	Murmurs/ Valvular disease
CARDIOVASCULAR	Thrombotic / hemorrhagic	Cephalic venous thrombosis	CV.07.78	MCVI	Ischaemic heart disease
CARDIOVASCULAR	Thrombotic / hemorrhagic	Infarction/Stenosis	CV.07.78	MCVI	Ischaemic heart disease
CARDIOVASCULAR	Unknown or not specified	Pulmonary Valve Disease	CV.07.83	MCCV	Murmurs/ Valvular disease
CARDIOVASCULAR	Unknown or not specified	Tricuspid Valve Disease	CV.08.83	MCCV	Murmurs/ Valvular disease
CARDIOVASCULAR	Unknown or not specified	Mitral Valve Disease	CV.09.83	MCCV	Murmurs/ Valvular disease
DERMATOLOGICAL	Unknown or not specified	Other dermatologic illness / disorder	DE.00.83	MDZX	Other rash not otherwise mentioned or undiagnosed
DERMATOLOGICAL	Allergic	Allergic reaction - Hives	DE.01.71	MDYU	Urticaria
DERMATOLOGICAL	Environmental - non exercise	Burn	DE.01.73	MXSE	Environmental Illness
DERMATOLOGICAL	Immunological / Inflammatory	Contact dermatitis	DE.01.74	MDYD	Dermatitis
DERMATOLOGICAL	Infection	Tinea pedis (athlete's foot), cruris (jock itch) or ringworm	DE.01.75	MDIT	Tinea pedis/ athlete's foot
DERMATOLOGICAL	Neoplasm	Irregular mole / skin lesion	DE.01.76	MDIW	Wrist and hand warts
DERMATOLOGICAL	Unknown or not specified	Skin ulcer	DE.01.83	MDYX	Rash / other dermatological condition
DERMATOLOGICAL	Immunological / Inflammatory	Eczema	DE.02.74	MDYD	Dermatitis
DERMATOLOGICAL	Infection	Scabies or 'Pediculosis (lice)	DE.02.75	MDIZ	Other skin infection not specifically mentioned
DERMATOLOGICAL	Neoplasm	Skin Neoplasm	DE.02.76	MDBX	Skin Lesion/ Tumour
DERMATOLOGICAL	Unknown or not specified	Black heel (Talon noir)	DE.02.83	MDYX	Rash / other dermatological condition
DERMATOLOGICAL	Immunological / Inflammatory	Acne vulgaris	DE.03.74	MDYX	Rash / other dermatological condition
DERMATOLOGICAL	Infection	Herpes gladiatorum or Herpes simplex / genitalis	DE.03.75	MDIV	Skin infection - viral ( incl warts)
DERMATOLOGICAL	Unknown or not specified	Pityriasis Rosea	DE.03.83	MDYX	Rash / other dermatological condition
DERMATOLOGICAL	Infection	Molluscum contagiosum	DE.04.75	MDIV	Skin infection - viral ( incl warts)
DERMATOLOGICAL	Unknown or not specified	Systemic disease of nail	DE.04.83	MZXX	Medical Illness Undiagnosed/ Other
DERMATOLOGICAL	Infection	Warts	DE.05.75	MDIS	Feet warts - incl plantar warts
DERMATOLOGICAL	Infection	Cellulitis or Folliculitis	DE.06.75	MDIX	Skin Infection/ Cellulitis/ Abcess
DERMATOLOGICAL	Infection	Boil, Abcess, Furuncle (bacterial)	DE.07.75	MDIX	Skin Infection/ Cellulitis/ Abcess
DERMATOLOGICAL	Infection	Impetigo / staphylococcal skin infection	DE.08.75	MDIX	Skin Infection/ Cellulitis/ Abcess
DERMATOLOGICAL	Infection	Methicillin Resistant Staphylococcus Aureus (MRSA)	DE.09.75	MXI8	Infection, other
DENTAL	Infection	Dental carries	DT.01.75	mtit	Dental caries
DENTAL	Infection	Periodontitis	DT.02.75	MTIP	Periodontitis
ENDOCRINOLOGICAL	Unknown or not specified	Other endocrinologic illness / disorder	EN.00.83	MYYZ	Other endocrine disorder
ENDOCRINOLOGICAL	Neoplasm	Ovarian Cyst	EN.01.76	MZZX	Other medical illness
ENDOCRINOLOGICAL	Metabolic / nutritional	Hypoglycemia	EN.01.77	MYYZ	Other endocrine disorder
ENDOCRINOLOGICAL	Degenerative or chronic	Obesity / overweight	EN.01.79	MZZO	Obesity
ENDOCRINOLOGICAL	Multiple	Pituitary stress syndrome	EN.01.82	MYYZ	Other endocrine disorder
ENDOCRINOLOGICAL	Neoplasm	Pituitary Neoplasm	EN.02.76	MRBXX	Other tumour not otherwise mentioned
ENDOCRINOLOGICAL	Metabolic / nutritional	Anabolic Steroid Related	EN.02.77	MXDD	Drug Use/ Overdose/ Poisoning
ENDOCRINOLOGICAL	Multiple	Short luteal Phase / Anovulation	EN.02.82	MUXZ	Other gynaecological illness
ENDOCRINOLOGICAL	Metabolic / nutritional	Hypercholesterolemia	EN.03.77	MZZX	Other medical illness
ENDOCRINOLOGICAL	Multiple	Amenorrhea / Oligomenorrhea	EN.03.82	MUYA	Other amenorrhoea
ENDOCRINOLOGICAL	Multiple	Dysmenorrhea / Menorrhagia	EN.04.82	MUYD	Dysmennorrhoea
ENDOCRINOLOGICAL	Multiple	Delayed menarche	EN.05.82	MUYA	Other amenorrhoea
ENDOCRINOLOGICAL	Multiple	Cushing's syndrome	EN.06.82	MYYZ	Other endocrine disorder
ENDOCRINOLOGICAL	Multiple	Hyperthyroid	EN.07.82	MYYT	Thyroid disorder
ENDOCRINOLOGICAL	Multiple	Hypothyroid	EN.08.82	MYYT	Thyroid disorder
ENDOCRINOLOGICAL	Multiple	Acromegaly	EN.09.82	MYYZ	Other endocrine disorder
GASTROINTESTINAL	Unknown or not specified	Other gastrointestinal illness / disorder	GI.00.83	MGXX	Gastrointestinal Illness
GASTROINTESTINAL	Infection	Traveller’s Diarrhea	GI.01.75	MGXD	Diarrhoea
GASTROINTESTINAL	Neoplasm	Gastrointestinal Neoplasm	GI.01.76	MRBXX	Other tumour not otherwise mentioned
GASTROINTESTINAL	Metabolic / nutritional	Celiac Disease	GI.01.77	MGXX	Gastrointestinal Illness
GASTROINTESTINAL	Thrombotic / hemorrhagic	Hemorrhoids	GI.01.78	MGXX	Gastrointestinal Illness
GASTROINTESTINAL	Unknown or not specified	Gastroesophageal Reflux (GERD)	GI.01.83	MGXX	Gastrointestinal Illness
GASTROINTESTINAL	Infection	Runner’s Diarrhea	GI.02.75	MGED	Runner's diarrhoea
GASTROINTESTINAL	Metabolic / nutritional	Malabsorbtion Syndrome	GI.02.77	MGXX	Gastrointestinal Illness
GASTROINTESTINAL	Unknown or not specified	Stomach Ulcer	GI.02.83	MGYU	Gastritis/ peptic ulceration - non exercise/ NSAID related
GASTROINTESTINAL	Immunological / Inflammatory	Gastritis	GI.03.74	MGYX	Gastritis
GASTROINTESTINAL	Infection	Other Colon Infection	GI.03.75	MGIZ	Other gastrointestinal infection
GASTROINTESTINAL	Metabolic / nutritional	Irritable Bowel Syndrome	GI.03.77	MGXX	Gastrointestinal Illness
GASTROINTESTINAL	Unknown or not specified	Superior Mesenteric Disease	GI.03.83	MGXX	Gastrointestinal Illness
GASTROINTESTINAL	Infection	Appendicitis	GI.04.75	MGIA	Appendicitis
GASTROINTESTINAL	Metabolic / nutritional	Crohn’s Disease	GI.04.77	MGXX	Gastrointestinal Illness
GASTROINTESTINAL	Unknown or not specified	Abdominal pain / illness -Misc	GI.04.83	OZX	Abdominal pain not otherwise specified
GASTROINTESTINAL	Infection	Gastroenteritis	GI.05.75	MGIX	Gastrointestinal infection
GASTROINTESTINAL	Unknown or not specified	Gall Stones	GI.05.83	MGYC	Cholecystitis
GASTROINTESTINAL	Infection	Duodeual Ulcer	GI.06.75	MGYU	Gastritis/ peptic ulceration - non exercise/ NSAID related
GASTROINTESTINAL	Unknown or not specified	Pancreatic Disease	GI.06.83	MGXX	Gastrointestinal Illness
GASTROINTESTINAL	Allergic	Allergy Syndrome	GI.07.71	MPA3	Asthma/allergy/hay fever/respiratory
GASTROINTESTINAL	Infection	Hepatitis	GI.07.75	MGIH	Viral hepatitis ( A, B, or C)
GASTROINTESTINAL	Unknown or not specified	Ulcerative Colitis	GI.07.83	MGYC	Cholecystitis
GASTROINTESTINAL	Unknown or not specified	Anal Fissure	GI.08.83	MGXX	Gastrointestinal Illness
GASTROINTESTINAL	Unknown or not specified	Stitch	GI.09.83	OPY	Abdominal muscle cramps
GENITOURINARY	Unknown or not specified	Other GU illness / disorder	GU.00.83	MGXX	Gastrointestinal Illness
GENITOURINARY	Environmental - exercise related	Exercise Induced Hematuria	GU.01.72	MUVH	Haematuria
GENITOURINARY	Infection	Pyelonephritis	GU.01.75	MUIP	Pyelonephritis
GENITOURINARY	Neoplasm	Genitourinary Neoplasm	GU.01.76	MRBXX	Other tumour not otherwise mentioned
GENITOURINARY	Unknown or not specified	Polycyctic Ovaries	GU.01.83	MUZX	Gynaecological Consultation
GENITOURINARY	Environmental - exercise related	Myoglobinuria (Rhabdomyolysis)	GU.02.72	MRER	Rhabdomyolysis
GENITOURINARY	Infection	Urinary Tract Infection	GU.02.75	MUIT	Urinary Tract Infection
GENITOURINARY	Neoplasm	Testicle Neoplasm	GU.02.76	MRBXX	Other tumour not otherwise mentioned
GENITOURINARY	Unknown or not specified	Renal Stone	GU.02.83	MUXX	Genitourinary Illness
GENITOURINARY	Infection	Cystitis	GU.03.75	MUIC	Cystitis
GENITOURINARY	Neoplasm	Ovary Neoplasm	GU.03.76	MRBXX	Other tumour not otherwise mentioned
GENITOURINARY	Unknown or not specified	Testicle Torsion	GU.03.83	MUXX	Genitourinary Illness
GENITOURINARY	Infection	Sexually Transmitted Disease	GU.04.75	MUIS	Sexually transmitted disease
GENITOURINARY	Unknown or not specified	Ovarian Failure	GU.04.83	MUYA	Other amenorrhoea
GENITOURINARY	Infection	Epididymitis	GU.05.75	MUIE	Epididymitis
GENITOURINARY	Unknown or not specified	Athletic Pseudonephritis	GU.05.83	MUXX	Genitourinary Illness
GENITOURINARY	Unknown or not specified	Pregnancy	GU.06.83	MZZX	Other medical illness
GENITOURINARY	Unknown or not specified	Renal Failure	GU.07.83	MUXX	Genitourinary Illness
GENITOURINARY	Unknown or not specified	Vaginal Discharge	GU.08.83	MZZX	Other medical illness
HAEMATOLOGIC	Unknown or not specified	Other hematologic illness / disorder	BL.00.83	MHXX	Haematological Illness and Nutritional Deficiencies
HAEMATOLOGIC	Neoplasm	Hemotologic Neoplasm	BL.01.76	MHB	Haematological Malignancy
HAEMATOLOGIC	Metabolic / nutritional	Iron deficiency anemia	BL.01.77	MHMF	Iron deficiency anemia
HAEMATOLOGIC	Thrombotic / hemorrhagic	Platelet Disorder	BL.01.78	MHXX	Haematological Illness and Nutritional Deficiencies
HAEMATOLOGIC	Unknown or not specified	Splenomegaly	BL.01.83	MHXX	Haematological Illness and Nutritional Deficiencies
HAEMATOLOGIC	Neoplasm	Hodgkin's Lymphoma	BL.02.76	MRBXX	Other tumour not otherwise mentioned
HAEMATOLOGIC	Metabolic / nutritional	non-Iron deficiency anemia	BL.02.77	MHNA	Anaemia
HAEMATOLOGIC	Thrombotic / hemorrhagic	Clotting Disorder	BL.02.78	MHXX	Haematological Illness and Nutritional Deficiencies
HAEMATOLOGIC	Neoplasm	Non-Hodgkin's Lymphoma	BL.03.76	MRBXX	Other tumour not otherwise mentioned
HAEMATOLOGIC	Metabolic / nutritional	Vitamin B12 Deficiency	BL.03.77	MHXX	Haematological Illness and Nutritional Deficiencies
HAEMATOLOGIC	Thrombotic / hemorrhagic	Sickle cell trait / disorder	BL.03.78	MHXX	Haematological Illness and Nutritional Deficiencies
HAEMATOLOGIC	Metabolic / nutritional	Pre-latent iron deficiency	BL.04.77	MHXX	Haematological Illness and Nutritional Deficiencies
HAEMATOLOGIC	Metabolic / nutritional	Latent iron deficiency	BL.05.77	MHXX	Haematological Illness and Nutritional Deficiencies
MUSCULOSKELETAL	Multiple	Fibromyalgia	MS.00.82	MRZF	Fibromyalgia/ multiple sore muscle areas
MUSCULOSKELETAL	Environmental - exercise related	Non-Specific Cramps	MS.01.72	MZZX	Other medical illness
MUSCULOSKELETAL	Immunological / Inflammatory	Other Rheumatic illness / disorder	MS.01.74	MRYX	Rheumatological Illness
MUSCULOSKELETAL	Infection	MSK sepsis	MS.01.75	MRIF	Infected foot joint
MUSCULOSKELETAL	Degenerative or chronic	Osteoporosis	MS.01.79	MZXX	Medical Illness Undiagnosed/ Other
MUSCULOSKELETAL	Multiple	Marfan Syndrome	MS.01.82	MXN7	Nutritional (including vitamin deficiency)
MUSCULOSKELETAL	Unknown or not specified	Regional Pain Syndrome	MS.01.83	MNZX	Other neurological problem
MUSCULOSKELETAL	Immunological / Inflammatory	Gout	MS.02.74	MRYG	Gout
MUSCULOSKELETAL	Infection	Osteomyelitis	MS.02.75	MRIB	Infection of bone - osteomyelitis
MUSCULOSKELETAL	Unknown or not specified	Exostosis	MS.02.83	MRBXQ	Tumour lower leg
MUSCULOSKELETAL	Immunological / Inflammatory	Pseudogout / Chondrocalcinosis	MS.03.74	MRYP	Pseudogout
MUSCULOSKELETAL	Infection	Brodie's abscess	MS.03.75	MRIB	Infection of bone - osteomyelitis
MUSCULOSKELETAL	Multiple	Ehlers-Danlos Syndrome	MS.03.82	MRZX	Rheumatological disease other/ undiagnosed
MUSCULOSKELETAL	Immunological / Inflammatory	Ankylosing spondylitis	MS.04.74	MRYA	Anklylosing spondylitis
MUSCULOSKELETAL	Infection	Fibular osteomyelitis	MS.04.75	MRIB	Infection of bone - osteomyelitis
MUSCULOSKELETAL	Metabolic / nutritional	McArdle's Syndrome	MS.04.77	MZXX	Medical Illness Undiagnosed/ Other
MUSCULOSKELETAL	Multiple	Sjogren's Syndrome	MS.04.82	MRYX	Rheumatological Illness
MUSCULOSKELETAL	Immunological / Inflammatory	Reiter's Syndrome	MS.05.74	MRYI	Reiter's syndrome
MUSCULOSKELETAL	Infection	Joint sepsis	MS.05.75	MRIJE	Infected elbow joint
MUSCULOSKELETAL	Immunological / Inflammatory	Other Seronegative Spondarthropathies	MS.06.74	MRYN	Seronegative arthritis
MUSCULOSKELETAL	Infection	Septic bursitis	MS.06.75	EB1	Elbow olecranon bursitis
MUSCULOSKELETAL	Immunological / Inflammatory	Rheumatoid Arthritis	MS.07.74	MRYR	Rheumatoid arthritis
MUSCULOSKELETAL	Infection	Palm infection	MS.07.75	MDIP	Skin infection wrist/hand
MUSCULOSKELETAL	Immunological / Inflammatory	Lupus	MS.08.74	MRZX	Rheumatological disease other/ undiagnosed
MUSCULOSKELETAL	Infection	Upper extremity stump iinfection	MS.08.75
MUSCULOSKELETAL	Immunological / Inflammatory	Myositis	MS.09.74	MRZX	Rheumatological disease other/ undiagnosed
MUSCULOSKELETAL	Infection	Lower extremity stump iinfection	MS.09.75
NEUROLOGICAL	Neoplasm	Neurologic Neoplasm	NS.00.76	MRBXX	Other tumour not otherwise mentioned
NEUROLOGICAL	Unknown or not specified	Other nervous system illness / disorder	NS.00.83	MNZX	Other neurological problem
NEUROLOGICAL	Immunological / Inflammatory	Idiopathic brachial neuritis	NS.01.74	MNIB	Brachial neuritis
NEUROLOGICAL	Infection	Meningitis	NS.01.75	MXI8	Infection, other
NEUROLOGICAL	Thrombotic / hemorrhagic	Stroke	NS.01.78	MNZX	Other neurological problem
NEUROLOGICAL	Unknown or not specified	Peripheral neuropathy	NS.01.83	MNZX	Other neurological problem
NEUROLOGICAL	Infection	Herpes Zoster / Shingles	NS.02.75	MXI5	Virus proven by serology
NEUROLOGICAL	Unknown or not specified	Multiple sclerosis	NS.02.83	MNZX	Other neurological problem
NEUROLOGICAL	Unknown or not specified	Headache	NS.03.83	MNZH	Headaches
NEUROLOGICAL	Unknown or not specified	Migraine	NS.05.83	MNYM	Migraine
NEUROLOGICAL	Unknown or not specified	Convulsive disorder / epilepsy	NS.06.83	MNJE	Epilepsy
NEUROLOGICAL	Unknown or not specified	Vertigo / Menier's disease	NS.07.83	MNZX	Other neurological problem
NEUROLOGICAL	Unknown or not specified	Polyneuritis / Guillan-Barre Syndrome	NS.08.83	MNZX	Other neurological problem
NEUROLOGICAL	Unknown or not specified	Post-polio Syndrome	NS.09.83	MZZX	Other medical illness
OPTHALMOLOGICAL	Infection	Stye	OP.01.75	MOZ1	Opthalmological Illness ( excl trauma)
OPTHALMOLOGICAL	Infection	Conjunctivitis	OP.02.75	MOZ1	Opthalmological Illness ( excl trauma)
OTOLOGICAL	Infection	Otitis media	OT.01.75	MPZT	Nose / throat illness / condition
OTOLOGICAL	Unknown or not specified	Dizziness/ Vertigo	OT.01.83	MPZT	Nose / throat illness / condition
OTOLOGICAL	Infection	Otitis externa = swimmer's ear	OT.02.75	MPZT	Nose / throat illness / condition
OTOLOGICAL	Unknown or not specified	Labyrinthitis	OT.02.83	MXN7	Nutritional (including vitamin deficiency)
PSYCHIATRIC / PSYCHOLOGICAL	Unknown or not specified	Other psychiatric illness / disorder	PS.00.83	MSZX	Other psychological/ psychiatric disorder not otherwise specified
PSYCHIATRIC / PSYCHOLOGICAL	Metabolic / nutritional	Anorexia nervosa / bulemia	PS.01.77	MSNA	Anorexia nervosa
PSYCHIATRIC / PSYCHOLOGICAL	Developmental	Attention deficit hyperactivity disorder	PS.01.80	MZZX	Other medical illness
PSYCHIATRIC / PSYCHOLOGICAL	Unknown or not specified	Depression /bipolar disorder	PS.01.83	MSXD	Depression
PSYCHIATRIC / PSYCHOLOGICAL	Unknown or not specified	Anxiety	PS.02.83	MSSA	Anxiety/ panic disorder
PSYCHIATRIC / PSYCHOLOGICAL	Unknown or not specified	Insomnia, jet lag and sleep disturbance	PS.03.83	MZZX	Other medical illness
PSYCHIATRIC / PSYCHOLOGICAL	Unknown or not specified	Overtraining syndrome	PS.04.83	MXN1	Tired athlete undiagnosed
PSYCHIATRIC / PSYCHOLOGICAL	Unknown or not specified	Burn-out, fatigue syndrome	PS.05.83	MYYF	Chronic Fatigue Syndrome
PSYCHIATRIC / PSYCHOLOGICAL	Unknown or not specified	Sexual assault	PS.06.83	MYYF	Chronic Fatigue Syndrome
RESPIRATORY	Infection	Sinusitis	RE.07.75	MPAL	Allergy - rhinitis/ sinusitis/ hayfever
RESPIRATORY	Unknown or not specified	Other respiratory illness / disorder	RE.00.83	MPZX	Other respiratory illness not otherwise specified
RESPIRATORY	Allergic	Hayfever	RE.01.71	MPAL	Allergy - rhinitis/ sinusitis/ hayfever
RESPIRATORY	Immunological / Inflammatory	Exercise Induced Asthma (EIA/EIB)	RE.01.74	MPEE	Asthma - exericse induced only
RESPIRATORY	Infection	Upper Respiratory Tract Infection - Viral	RE.01.75	MEIR	Respiratory infection upper (incl. tonsillitis)
RESPIRATORY	Neoplasm	Respiratory neoplasm	RE.01.76	MPZX	Other respiratory illness not otherwise specified
RESPIRATORY	Unknown or not specified	Pneumothorax - Spontaneous	RE.01.83	COP	Pneumothorax
RESPIRATORY	Immunological / Inflammatory	Asthma	RE.02.74	MPA3	Asthma/allergy/hay fever/respiratory
RESPIRATORY	Infection	Tonsilitis	RE.02.75	MPIT	Tonsillitis
RESPIRATORY	Unknown or not specified	Cystic fibrosis	RE.02.83	MPJC	Cystic Fibrosis
RESPIRATORY	Infection	Quinsy (Peritonsillar Abscess)	RE.03.75	MPIT	Tonsillitis
RESPIRATORY	Unknown or not specified	COPD- Chronic Obstrucitve Pulmonary Disease	RE.03.83	MPCX	Chronic airflow limitation
RESPIRATORY	Infection	Pharyngitis	RE.04.75	MPIG	Pharyngitis
RESPIRATORY	Unknown or not specified	Chronic rhinitis	RE.04.83	MPAL	Allergy - rhinitis/ sinusitis/ hayfever
RESPIRATORY	Infection	Bronchitis / lower respiratory tract infection	RE.05.75	MEIR	Respiratory infection upper (incl. tonsillitis)
RESPIRATORY	Infection	Pneumonia	RE.06.75	MPIP	Pneumonia/bronchitis/lower RTI
THERMOREGULATORY	Environmental - exercise related	Hypothermia	EV.01.72	MAEO	Hypothermia
THERMOREGULATORY	Environmental - exercise related	Hyperthermia / Heat illness (exhaustion, syncope, stroke)	EV.02.72	MAES	Hyperthermia/ heat stroke
THERMOREGULATORY	Environmental - exercise related	Heat cramps	EV.03.72	MAE1	Heat Illness
MULTIPLE OR NOS	Environmental - non exercise	Other environmental illness / disorder	MO.00.73	MXSE	Environmental Illness
MULTIPLE OR NOS	Infection	Other infectious illness / disorder	MO.00.75	MXI8	Infection, other
MULTIPLE OR NOS	Metabolic / nutritional	Other fluid and electrolyte illness / disorder	MO.00.77	MZXX	Medical Illness Undiagnosed/ Other
MULTIPLE OR NOS	Environmental - exercise related	Altitude / mountain sickness	MO.01.72	MXSE	Environmental Illness
MULTIPLE OR NOS	Environmental - non exercise	Frostbite	MO.01.73	MAE1	Heat Illness
MULTIPLE OR NOS	Infection	Non-specific viral Illness	MO.01.75	MXI5	Virus proven by serology
MULTIPLE OR NOS	Environmental - exercise related	High Altitude Pulmonary or Cerebral Edema	MO.02.72	MXSE	Environmental Illness
MULTIPLE OR NOS	Environmental - non exercise	Sunburn	MO.02.73	MDSS	Sunburn
MULTIPLE OR NOS	Infection	Influenza	MO.02.75	MXI5	Virus proven by serology
MULTIPLE OR NOS	Environmental - exercise related	Nitrogen narcosis	MO.03.72	MXSE	Environmental Illness
MULTIPLE OR NOS	Environmental - non exercise	Drowning	MO.03.73	MXSE	Environmental Illness
MULTIPLE OR NOS	Infection	Mononucleosis (EBV) / CMV	MO.03.75	MXIG	Glandular Fever
MULTIPLE OR NOS	Environmental - exercise related	Decompression sickness	MO.04.72	MXED	Decompression sickness
MULTIPLE OR NOS	Environmental - non exercise	Diving reflex / sudden death	MO.04.73	MXSE	Environmental Illness
MULTIPLE OR NOS	Infection	Shingles (herpes zoster) - non trunk	MO.04.75	MDIV	Skin infection - viral ( incl warts)
MULTIPLE OR NOS	Environmental - exercise related	Hyponatremia	MO.05.72	MZXX	Medical Illness Undiagnosed/ Other
MULTIPLE OR NOS	Infection	Lymphadenitis / lymphangitis	MO.05.75	MXI8	Infection, other
MULTIPLE OR NOS	Environmental - exercise related	Hypernatremia	MO.06.72	MZXX	Medical Illness Undiagnosed/ Other
MULTIPLE OR NOS	Infection	Post Viral Fatigue	MO.06.75	MXI5	Virus proven by serology
MULTIPLE OR NOS	Environmental - exercise related	Dehydration	MO.07.72	MZXX	Medical Illness Undiagnosed/ Other
MULTIPLE OR NOS	Infection	Varicella	MO.07.75	MXIV	Chicken Pox
MULTIPLE OR NOS	Infection	HIV related	MO.08.75	MXI5	Virus proven by serology
UNKNOWN OR NOT SPECIFIED	Neoplasm	Head neoplasm	UO.91.76	MXBCH	Tumour head
UNKNOWN OR NOT SPECIFIED	Neoplasm	Neck Neoplasm	UO.92.76	MRBXN	Tumour neck
UNKNOWN OR NOT SPECIFIED	Neoplasm	Upper extremity neoplasm	UO.93.76	MRBXS	Tumour shoulder
UNKNOWN OR NOT SPECIFIED	Neoplasm	Lower extremity neoplasm	UO.94.76	MRBXU	Tumour upper arm
UNKNOWN OR NOT SPECIFIED	Neoplasm	Thoracic neoplasm	UO.95.76	MRBXD	Tumour thoracic spine/ chest wall
UNKNOWN OR NOT SPECIFIED	Neoplasm	Abdominal Neoplasm	UO.96.76	MRBXX	Other tumour not otherwise mentioned
UNKNOWN OR NOT SPECIFIED	Neoplasm	Lumbar neoplasm	UO.97.76	MRBXL	Tumour lumbar spine

## Sheet: OSIICS13 to SMDCS2 by IOC cats
Body part/medical system	Pathology type	OSIICS13 code	Diagnosis	SMDCS Code	SMDCS description
Head	Muscle injury	HMY	Facial muscle trigger points
Head	Muscle injury	HMT	Muscular trigger point referred headache
Head	Nerve injury	HN1	Concussion	HE.21.40	Concussion
Head	Nerve injury	HN2	Concussion/Brain Injury	HE.24.40	Structural brain injury
Head	Nerve injury	HNV	Acute Concussion with visual symptoms	HE.20.40
Head	Nerve injury	HN3	Chronic Brain Injury	HE.80.40
Head	Nerve injury	HNI	Intracranial Bleed	HE.23.40	Subdural / epidural hematoma
Head	Nerve injury	HN4	Cranial Nerve injury	NE.22.39	11th cranial nerve injury
Head	Fracture	HF1	Nose fracture	HE.35.13	Nasal fracture
Head	Fracture	HF3	Mandible fracture	HE.30.13
Head	Fracture	HFT	Avulsed/fractured tooth	HE.93.00	Other dental injury
Head	Fracture	HFX	Head/Facial fracture	HE.33.13	Facial fracture
Head	Fracture	HF4	Orbital fracture	HE.30.13
Head	Fracture	HFE	Orbital floor fracture	HE.30.13
Head	Fracture	HFEM	Medial Wall orbit fracture	HE.30.13
Head	Fracture	HFEZ	Other orbital fracture not otherwise specified	HE.30.13
Head	Fracture	HFZ	Zygoma fracture	HE.30.13
Head	Fracture	HFM	Maxillary fracture	HE.30.13
Head	Fracture	HFMC	Compound fractured mandible	HE.30.13
Head	Fracture	HFS	Skull/cranial fracture	HE.34.13	Skull fracture
Head	Fracture	HF2	Fractured frontal bone	HE.30.13
Head	Fracture	HFD	Fractured Tooth	HE.32.13	Teeth fracture
Head	Ligament	HLJ	Jaw bruising/haematoma	HE.60.24	Facial contusion
Head	Ligament	HLS	Facial Joint sprain/injury
Head	Ligament	HLT	Jaw sprain/TMJ symptoms	HE.51.30	TMJ disorder
Head	Joint sprain	HDX	Facial Dislocation	HE.40.10
Head	Joint sprain	HD1	Jaw dislocation	HE.40.10
Head	Joint sprain	HDT	Avulsed Tooth
Head	Contusion/vascular	HV1	Head/facial contusion/haematoma	HE.60.24	Facial contusion
Head	Contusion/vascular	HVN	Nose contusion/haematoma	HE.32.24	Nasal contusion
Head	Contusion/vascular	HVE	Eye bruising/haematoma	HE.80.24
Head	Contusion/vascular	HVP	Periorbital bruising/haematoma	HE.60.24	Facial contusion
Head	Contusion/vascular	HVL	Scalp bruising/haematoma	HE.60.24	Facial contusion
Head	Contusion/vascular	HVB	Epistaxis	HE.71.45	Epistaxis
Head	Contusion/vascular	HVS	Septal haematoma	HE.60.33
Head	Contusion/vascular	HVM	Mouth bruising/haematoma	HE.60.24	Facial contusion
Head	Contusion/vascular	HVO	Ear bruising/haematoma	HE.60.24	Facial contusion
Head	Contusion/vascular	HVC	Cauliflower Ear (chronic)	HE.61.24	Cauliflower ear
Head	Contusion/vascular	HVX	Other bruising/haematoma not otherwise specified	HE.60.24	Facial contusion
Head	Laceration	HK1	Head/facial laceration	HE.60.25	Head Laceration
Head	Laceration	HKXQ	Complication of head laceration including infection	HE.60.75
Head	Laceration	HKXS	Head laceration location unspecified/or multiple requiring suturing	HE.60.25	Head Laceration
Head	Laceration	HKXN	Head laceration location unspecified/or multiple not requiring suturing	HE.60.25	Head Laceration
Head	Laceration	HKHS	Forehead laceration requiring suturing	HE.60.25	Head Laceration
Head	Laceration	HKF	Forehead laceration not requiring suturing
Head	Laceration	HKBS	Eyebrow laceration requiring suturing	HE.60.25	Head Laceration
Head	Laceration	HKB	Eyebrow laceration not requiring suturing
Head	Laceration	HK2	Eyelid laceration
Head	Laceration	HKE	Eyelid laceration requiring suturing
Head	Laceration	HKLN	Eyelid laceration not requiring suturing
Head	Laceration	HKCS	Cheek laceration requiring suturing	HE.60.25	Head Laceration
Head	Laceration	HKC	Cheek laceration not requiring suturing
Head	Laceration	HKNS	Nose laceration requiring suturing	HE.60.25	Head Laceration
Head	Laceration	HKN	Nose laceration not requiring suturing
Head	Laceration	HKMS	Musocal laceration requiring suturing	HE.60.25	Head Laceration
Head	Laceration	HKM	Mucosal laceration not requiring suturing	HE.60.25	Head Laceration
Head	Laceration	HKK	Lip laceration
Head	Laceration	HKKS	Lip laceration requiring suturing	HE.60.25	Head Laceration
Head	Laceration	HKT	Tongue laceration	HE.63.25	Tongue laceration
Head	Laceration	HKTS	Tongue laceration requiring suturing	HE.60.25	Head Laceration
Head	Laceration	HKTN	Tongue laceration not requiring suturing	HE.60.25	Head Laceration
Head	Laceration	HKP	Perforating mouth laceration	HE.60.25	Head Laceration
Head	Laceration	HKPS	Perforating mouth laceration requiring suturing	HE.60.25	Head Laceration
Head	Laceration	HKJ	Chin laceration not requiring suturing
Head	Laceration	HKE1	Ear laceration	HE.60.25	Head Laceration
Head	Laceration	HKES	Ear laceration requiring suturing	HE.60.25	Head Laceration
Head	Laceration	HKS	Scalp laceration	HE.61.25	Scalp laceration
Head	Laceration	HKZS	Facial laceration requiring suturing	HE.62.25	Facial laceration
Head	Laceration	HKZ	Facial laceration NOS not requiring suturing
Head	Abrasion	HIH	Forehead abrasion	HE.60.26
Head	Abrasion	HIB	Eyebrow abrasion	HE.60.26
Head	Abrasion	HIC	Cheek abrasion	HE.60.26
Head	Abrasion	HIN	Nose abrasion	HE.60.26
Head	Abrasion	HIM	Mouth abrasion	HE.60.26
Head	Abrasion	HIK	Lip abrasion not requiring suturing	HE.60.26
Head	Abrasion	HIJ	Chin abrasion	HE.60.26
Head	Abrasion	HIE	Ear abrasion	HE.60.26
Head	Abrasion	HIS	Scalp abrasion	HE.61.26	Scalp abrasion
Head	Abrasion	HIF	Facial abrasion not otherwise specified	HE.62.26	Facial abrasion
Head	Organ trauma	HO1	Eye injury/trauma	HE.80.00	Other eye injury
Head	Organ trauma	HOC	Conjunctival haematoma	HE.80.33
Head	Organ trauma	HOX	Head Organ Damage	HE.80.46
Head	Organ trauma	HOF	Eye foreign body - Corneal	HE.80.46
Head	Organ trauma	HOO	Eye foreign body - not otherwise specified	HE.80.46
Head	Organ trauma	HOH	Hyphaema	HE.80.33
Head	Organ trauma	HOU	Corneal Abrasion	HE.80.26	Corneal abrasion
Head	Organ trauma	HOL	Contact lens displacement	HE.82.46	Lens dislocation/subluxation
Head	Organ trauma	HOR	Retinal detachment	HE.81.46	Detached retina
Head	Organ trauma	HOE	Ear trauma
Head	Organ trauma	HO2	Perforated ear drum	HE.84.46	Traumatic perforated ear drum
Head	Organ trauma	HODL	Subluxed Tooth	HE.40.11
Head	Pain without tissue type specified	HP1	Functional head pain	HE.20.42
Head	Pain without tissue type specified	HPY	Facial muscle strain	HE.10.07
Head	Unknown	HZN	Head impact not diagnosed as concussion	HE.20.40
Head	Unknown	HZ1	Headache/pain undiagnosed	HE.90.00	Other injury to head
Head	Unknown	HZX	Head Injuries
Neck	Muscle injury	NMT	Neck muscle trigger pts/spasm/torticollis	NE.10.08	Torticolis / spasm
Neck	Muscle injury	NM1	Neck muscle strain	NE.11.07	Trapezius strain
Neck	Muscle contusion	NH1	Neck contusion/haematoma	NE.90.24	Neck / throat contusion
Neck	Nerve injury	NN1	Cervical nerve root compression/stretch	NE.20.42	Neck radiculopathy
Neck	Nerve injury	NNX	Neurological Neck Injury
Neck	Nerve injury	NN2	Cervical spinal cord injury	NE.22.40	Cervical spinal cord compression/transection
Neck	Nerve injury	NN4	Cervical spinal cord concussion	NE.21.40	Cervical spinal contusion/concussion
Neck	Nerve injury	NN3	Cervical spinal canal stenosis	NE.31.33	Cervical spinal stenosis
Neck	Fracture	NFX	Neck Fracture	NE.30.13
Neck	Fracture	NFC	Cervical Fracture/s	NE.31.13	Cervical spine fracture
Neck	Fracture	NF1	Stable cervical fracture/s	NE.30.13
Neck	Fracture	NF2	Unstable cervical fracture/s	NE.30.13
Neck	Fracture	NFS	Avulsion fracture/s cervical spine (e.g. spinous process fracture)	NE.30.14
Neck	Cartilage	NC1	Cervical disc Injury
Neck	Cartilage	NCL	Cervical Disc sprain
Neck	Cartilage	NCP	Cervical Disc Prolapse	NE.42.33	Cervical disc herniation
Neck	Cartilage	NC2	Cervical disc degeneration	NE.42.30	Cervical degenerative disc disease
Neck	Arthritis	NAX	Cervical spinal column degenerative disc disease/arthritis	NE.40.79
Neck	Arthritis	NA1	Cervical facet joint arthritis	NE.41.34	Cervical facet osteoarthritis
Neck	Ligament	NLW	Whiplash/neck sprain	NE.10.07	Cervical strain / whiplash
Neck	Ligament	NL1	Facet Joint/Neck Ligament sprain
Neck	Chronic instability	NU8	Cervical Spine Instability
Neck	Chronic instability	NUS	Cervical Subluxation/instability	NE.40.11
Neck	Laceration	NKX	Neck Laceration	NE.60.25	Neck laceration
Neck	Laceration	NKXQ	Complication of neck laceration including infection	NE.60.75
Neck	Laceration	NKXS	Neck laceration requiring suturing	NE.60.25	Neck laceration
Neck	Laceration	NK1	Neck laceration not requiring suturing	NE.60.25	Neck laceration
Neck	Abrasion	NIX	Neck abrasion
Neck	Organ trauma	NOF	Laryngeal fracture	NE.30.13
Neck	Organ trauma	NOX	Neck Organ Damage	NE.80.46
Neck	Organ trauma	NOL	Laryngeal trauma	NE.80.46
Neck	Organ trauma	NO1	Foreign body in larynx
Neck	Pain without tissue type specified	NPH	Cervicogenic headache
Neck	Pain without tissue type specified	NP1	Cervical functional pain	NE.41.30	Cervical facet syndrome
Neck	Pain without tissue type specified	NPM	Neck muscle and/or tendon strain/spasm/trigger points	NE.11.08	Trapezius trigger points
Neck	Unknown	NZ1	Neck pain undiagnosed	NE.90.00	Other neck injury
Neck	Unknown	NZZ	Neck Injuries
Neck	Unknown	NZX	Neck Pain/Injury Not Otherwise Specified	SH.90.42	Scapulothoracic dysfunction
Neck	Unknown	NZS	Structural Abnormality Cervical Spine
Neck	Unknown	NZO	Post neck surgery	NE.90.83
Shoulder	Muscle injury	SM1	Muscle strain, shoulder region	SH.10.07
Shoulder	Muscle injury	SMD	Deltoid muscle injury	SH.11.07	Deltoid strain
Shoulder	Muscle injury	SMP	Pectoralis major muscle strain	SH.13.07	Pectoralis strain
Shoulder	Muscle injury	SML	Latissimus dorsi muscle strain	CH.13.07	Latissimus dorsi strain
Shoulder	Muscle injury	SMR	Rotator Cuff muscle injury
Shoulder	Muscle injury	SMY	Shoulder muscle trigger points/posterior muscle soreness
Shoulder	Muscle injury	SMZ	Other shoulder muscle injury not elsewhere specified	SH.14.07	Rhomboid strain
Shoulder	Muscle contusion	SH1	Shoulder contusion/haematoma	SH.60.24	Shoulder Contusion
Shoulder	Muscle contusion	SHM	Shoulder muscle haematoma	SH.10.24
Shoulder	Muscle contusion	SHD	Deltoid haematoma	SH.60.33
Shoulder	Muscle contusion	SHA	A/C Joint contusion	SH.40.24
Shoulder	Muscle contusion	SHZ	Shoulder region contusion	SH.40.24
Shoulder	Tendinopathy	ST1	Rotator cuff tendon pathology	SH.12.28	Rotator cuff tendinopathy
Shoulder	Tendinopathy	ST2	Biceps tendinopathy	SH.13.28	Long head of biceps tendinitis
Shoulder	Tendinopathy	STD	Subacromial impingement	SH.41.30	Impingement syndrome/subacromial bursitis
Shoulder	Tendinopathy	STS	Supraspinatus tendinopathy	SH.10.28
Shoulder	Tendinopathy	ST3	Calcific tendinopathy	SH.10.28
Shoulder	Tendinopathy	ST4	Supraspinatus tendon tear partial thickness	SH.10.09
Shoulder	Tendinopathy	STIX	Infraspinatus tendon injury	SH.10.28
Shoulder	Tendinopathy	STI	Other Infraspinatus tendon injury Not otherwise specified	SH.10.28
Shoulder	Tendinopathy	STC	Subscapularis Tendon Injury	SH.10.28
Shoulder	Tendinopathy	STU	Other Subscapularis tendon injury not otherwise specified	SH.10.28
Shoulder	Tendinopathy	STB	Proximal biceps tendon injury	SH.10.28
Shoulder	Tendinopathy	STO	Other biceps tendon injury not otherwise specified	SH.10.28
Shoulder	Tendinopathy	STP	Other pec major tendon injury not otherwise specified	SH.10.28
Shoulder	Tendinopathy	STM	Multiple tendon injury	SH.10.28
Shoulder	Tendinopathy	STZ	Other tendon injury NOS	SH.10.28
Shoulder	Tendinopathy	STE	Shoulder impingement/Synovitis	SH.40.30	Adhesive capsulitis / frozen shoulder
Shoulder	Tendinopathy	STF	Acute anterior internal impingement
Shoulder	Tendon rupture	SR2	Rupture of long head of biceps tendon	SH.14.09	Long head of biceps rupture
Shoulder	Tendon rupture	SRS	Suprapinatus tendon rupture full thickness	SH.10.09
Shoulder	Tendon rupture	SRI	Infraspinatus tendon rupture	SH.10.09
Shoulder	Tendon rupture	SR1	Subscapularis tendon rupture	SH.10.09
Shoulder	Tendon rupture	SR3	Pec Major tendon rupture	SH.13.09	Pectoralis tear / rupture
Shoulder	Nerve injury	SN4	Suprascapular nerve entrapment or palsy	SH.24.39	Suprascapular nerve entrapment
Shoulder	Nerve injury	SNX	Shoulder Neurological injury	SH.22.39	Long thoracic nerve palsy / winging scapula
Shoulder	Nerve injury	SN3	Thoracic Outlet Syndrome (neural)	NE.70.45	Thoracic Outlet Syndrome
Shoulder	Nerve injury	SN1	Brachial plexus traction injury/burner/stinger	NE.21.39	Brachial plexus syndrome (Stinger)
Shoulder	Nerve injury	SN2	Isolated axillary nery palsy	SH.21.39	Axillary nerve Injury - Isolated
Shoulder	Fracture	SFA	Fracture dislocation A/C joint	SH.40.13
Shoulder	Fracture	SFX	Shoulder Fractures	SH.30.13
Shoulder	Fracture	SFC	Clavicular fracture	SH.32.13	Clavicular fracture
Shoulder	Fracture	SFO	Fracture outer third clavicle	SH.30.13
Shoulder	Fracture	SFM	Fracture middle third clavicle	SH.30.13
Shoulder	Fracture	SFI	Fracture inner third clavicle	SH.30.13
Shoulder	Fracture	SFR	Refracture clavicle through callus	SH.30.13
Shoulder	Fracture	SF2	Scapula fracture	SH.33.13	Scapular fracture
Shoulder	Fracture	SFB	Fractured glenoid /bony Bankart lesion	SH.30.13
Shoulder	Fracture	SF3	Fracture neck of humerus	SH.34.13	Humeral neck fracture
Shoulder	Fracture	SFHT	Fracture greater tuberosity humerus	SH.30.13
Shoulder	Fracture	SFS	Hill Sachs compression fracture	SH.34.21	Hill-Sachs Lesion
Shoulder	Bone stress injury	SSX	Shoulder stress/Overuse injuries incl stress fractures	SH.30.18
Shoulder	Bone stress injury	SSF	Shoulder bony stress/over use injury	SH.30.18
Shoulder	Bone stress injury	SS1	Stress fracture coracoid process	SH.30.18
Shoulder	Bone stress injury	SSA	A/C joint stress/overuse injury
Shoulder	Bone stress injury	SSZ	Other bony/overuse injuries noth elsewhere classified
Shoulder	Physis injury	SGS	Traction injury to apophysis at shoulder	SH.30.20
Shoulder	Physis injury	SGO	Osteochondrosis shoulder	SH.40.21	Chondromalacia
Shoulder	Cartilage	SC1	Shoulder chondral lesion	SH.40.21	Chondromalacia
Shoulder	Cartilage	SCS	SLAP lesion shoulder	SH.47.21	SLAP lesion
Shoulder	Cartilage	SCL	Glenohumeral joint sprain with chondral/labral damage (incl SLAP tear)	SH.44.17	Bankart lesion
Shoulder	Cartilage	SCB	Shoulder dislocation with labral bankart lesion	SH.40.10
Shoulder	Cartilage	SCH	Shoulder dislocation with HAGL lesion	SH.40.10
Shoulder	Cartilage	SCP	Posterior shoulder dislocation with posterior labral lesion	SH.40.10
Shoulder	Arthritis	SA2	A/C joint chronic pain	SH.40.42
Shoulder	Arthritis	SAO	Osteolysis of distal clavicle	SH.32.33	Distal clavicular osteolysis
Shoulder	Arthritis	SAX	Shoulder Osteoarthritis	SH.40.34	Shoulder degenerative/osteoarthritis
Shoulder	Arthritis	SA1	Glenohumeral osteoarthritis	SH.40.34	Shoulder degenerative/osteoarthritis
Shoulder	Arthritis	SAA	A/C joint arthritis	SH.42.34	Acromioclavicular degnerative arthritis
Shoulder	Synovitis / capsulitis	SQE	Internal impingement of the shoulder
Shoulder	Synovitis / capsulitis	SQF	Adhesive capsulitis/frozen shoulder	SH.40.30	Adhesive capsulitis / frozen shoulder
Shoulder	Synovitis / capsulitis	SQP	Acute posterior internal impingement
Shoulder	Synovitis / capsulitis	SQB	Chronic internal impingment
Shoulder	Synovitis / capsulitis	SQC	Cervical rib
Shoulder	Bursitis	SBS	Acute subacromial impingement	SH.41.33	Acute subacromial bursitis - calcific
Shoulder	Bursitis	SBI	Instability associated subacromial impingement	SH.40.12
Shoulder	Bursitis	SBC	Other chronic subacromial impingement
Shoulder	Ligament	SL2	Acromioclavicular (A/C) jt sprain
Shoulder	Ligament	SL1	Glenohumeral joint sprains
Shoulder	Ligament	SLI	Glenohumeral ligament sprain
Shoulder	Ligament	SLA	Grade 1 A/C joint sprain	SH.52.01	Acromioclavicular 1° sprain -acute
Shoulder	Ligament	SLJ	Grade 2 A/C joint sprain	SH.52.02	Acromioclavicular 2° sprain -acute
Shoulder	Ligament	SLD	Grade 3 A/C joint dislocation	SH.52.03	Acromioclavicular 3° sprain -acute
Shoulder	Joint sprain	SDS	Acute shoulder subluxation	SH.40.11
Shoulder	Joint sprain	SD1	Dislocated shoulder	SH.40.10
Shoulder	Joint sprain	SD2	Grade 4-6 A/C joint dislocation	SH.52.10	Acromioclavicular 4° to 6° (Type IV-VI) sprain -acute
Shoulder	Joint sprain	SDA	Shoulder dislocation (anterior)	SH.40.09
Shoulder	Joint sprain	SDG	Glenohumeral ligament tear	SH.50.09
Shoulder	Joint sprain	SDN	Shoulder dislocation with axillary nerve injury	SH.25.39	Axillary nerve Injury - With fracture or dislocation
Shoulder	Joint sprain	SDU	Shoulder dislocation with other or unspecified neurological injury	SH.40.10
Shoulder	Joint sprain	SDI	Inferior shoulder dislocation	SH.40.10
Shoulder	Joint sprain	SDP	Posterior shoulder dislocation	SH.54.10	Posterior dislocation (initial)
Shoulder	Chronic instability	SUA	Anterior shoulder instability	SH.53.11	Anterior subluxation (initial)
Shoulder	Chronic instability	SUP	Posterior shoulder instability	SH.54.11	Posterior subluxation
Shoulder	Chronic instability	SU1	Chronic Shoulder instability	SH.55.12	Multi-directional laxity (multidirectional)
Shoulder	Chronic instability	SUC	A/C Joint instability/recurrent sprains
Shoulder	Contusion/vascular	SVT	Shoulder vascular thoracic outlet injury	SH.70.45
Shoulder	Contusion/vascular	SVV	Subclavian vein obstruction	SH.70.45
Shoulder	Laceration	SKXQ	Complication of shoulder laceration including infection	SH.60.75
Shoulder	Laceration	SKXS	Shoulder laceration requiring suturing	SH.60.25	Shoulder laceration
Shoulder	Laceration	SK1	Shoulder laceration not requiring suturing
Shoulder	Abrasion	SIX	Shoulder Soft Tissue Abrasion	SH.60.26	Shoulder abrasion
Shoulder	Pain without tissue type specified	SPZ	Shoulder pain without tissue type specified
Shoulder	Unknown	SZ1	Shoulder pain undiagnosed	SH.90.00	Other shoulder injury
Shoulder	Unknown	SZS	Post shoulder surgery	SH.90.83
Shoulder	Unknown	SZP	Shoulder Pain/Injury not otherwise specified	AR.90.00	Other arm injury
Shoulder	Unknown	SZR	Post shoulder reconstruction	SH.90.83
Shoulder	Unknown	SZA	Post A/C joint surgery
Upper Arm	Muscle injury	UMX	Upper Arm Muscle Strain/Spasm/Trigger points	AR.10.07
Upper Arm	Muscle injury	UM1	Biceps muscle strain	AR.11.07	Biceps brachii strain
Upper Arm	Muscle injury	UMT	Triceps muscle strain	AR.12.07	Triceps strain
Upper Arm	Muscle injury	UMY	Upper arm muscle trigger points/pain	AR.10.42
Upper Arm	Muscle injury	UMD	Upper arm DOMS
Upper Arm	Muscle contusion	UHX	Upper Arm Soft Tissue Bruising/Haematoma	AR.90.24	Upper Arm Contusion
Upper Arm	Muscle contusion	UHT	Upper arm muscle bruising/haematoma	AR.10.24
Upper Arm	Muscle contusion	UH1	Biceps haematoma	AR.60.33
Upper Arm	Muscle contusion	UH3	Triceps Haematoma	AR.60.33
Upper Arm	Muscle contusion	UHM	Upper arm myositis ossificans	AR.11.33	Biceps brachii myositis ossificans
Upper Arm	Muscle contusion	UHZ	Other Upper arm soft tissue bruising/haematoma	AR.60.24
Upper Arm	Tendinopathy	UT8	Upper Arm Tendon Injury	AR.10.28
Upper Arm	Tendon rupture	UR1	Pectoralis major tendon injury	AR.10.28
Upper Arm	Nerve injury	UNX	Upper Arm neurological injury	EL.25.39	Posterior interosseous nerve entraptment
Upper Arm	Nerve injury	UN1	Median nerve injury upper arm	EL.23.39	Median nerve injury
Upper Arm	Nerve injury	UNR	Radial nerve injury upper arm	AR.21.39	Radial nerve injury
Upper Arm	Nerve injury	UNU	Ulnar nerve injury upper arm	AR.20.39
Upper Arm	Nerve injury	UNS	Musculocutaneous nerve injury upper arm	AR.10.39
Upper Arm	Fracture	UFX	Upper Arm Fracture	AR.30.13
Upper Arm	Fracture	UFH	Humerus fracture	AR.30.13
Upper Arm	Fracture	UF1	Midshaft humerus fracture	AR.32.13	Humeral shaft fracture
Upper Arm	Bone stress injury	USX	Upper Arm Bony Stress /Overuse Injury	AR.30.18
Upper Arm	Bone stress injury	USF	Upper arm stress fracture	AR.30.18
Upper Arm	Bone stress injury	US1	Stress fracture humerus	AR.32.18	Humeral stress fracture
Upper Arm	Bone contusion	UJX	Humerus bone contusion
Upper Arm	Physis injury	UGL	Little leaguers' shoulder
Upper Arm	Laceration	UK1	Upper arm laceration	AR.60.25	Upper arm laceration
Upper Arm	Abrasion	UIX	Upper Arm Abrasion	AR.60.26	Upper arm abrasion
Upper Arm	Stump injury	UWI	Infection of stump upper arm	AR.91.75
Upper Arm	Stump injury	UWS	Stump trauma upper arm	AR.91.44
Upper Arm	Pain without tissue type specified	UPZ	Other Upper Arm Overuse Injury
Upper Arm	Pain without tissue type specified	UPS	Upper arm soft tissue overuse injury (e.g. periostitis)	AR.10.32
Upper Arm	Unknown	UZX	Upper Arm Pain/Injury not otherwise specified	SH.34.20	Humeral proximal growth plate / physeal injury
Elbow	Muscle injury	EMX	Elbow muscle strain/spasm/trigger points	EL.10.07
Elbow	Tendinopathy	ET1	Tennis elbow (lateral epicondyle pain)	EL.11.28	Lateral epicondyopathy (tennis elbow)
Elbow	Tendinopathy	ET2	Golfer's elbow (medial epicondyle pain)	EL.12.28	Medial epicondylopathy (golfers' elbow)
Elbow	Tendinopathy	ET3	Distal triceps tendinopathy	EL.13.28	Triceps tendinopathy
Elbow	Tendinopathy	ETC	Elbow Tendon Injury Combined	EL.10.28
Elbow	Tendinopathy	ETE	Common extensor origin tear
Elbow	Tendinopathy	ETF	Common flexor origin tear
Elbow	Tendinopathy	ETB	Distal biceps tendinopathy	EL.14.28	Biceps tendinopathy
Elbow	Tendinopathy	ETT	Distal triceps tendon injury	EL.10.28
Elbow	Tendon rupture	ER1	Distal biceps tendon rupture	AR.11.09	Distal biceps rupture
Elbow	Tendon rupture	ER2	Distal triceps tendon rupture	AR.12.09	Triceps rupture
Elbow	Nerve injury	EN1	Ulnar neuropathy, elbow	EL.21.39	Ulnar nerve subluxation
Elbow	Nerve injury	EN2	Other nerve entrapment, elbow	EL.20.41	Elbow neuroma
Elbow	Fracture	EFX	Elbow Fractures	EL.33.20	Medial epicondyle growth plate / physeal injury
Elbow	Fracture	EFM	Avulsion fracture elbow multiple locations or location unspecified	EL.30.14
Elbow	Fracture	EFH	Supracondylar humeral fracture	EL.32.13	Supracondylar humeral fracture
Elbow	Fracture	EF2	Fractured humeral condyle(s)	EL.30.13
Elbow	Fracture	EF1	Avulsion fracture distal humerus	EL.33.14	Medial epicondyle avulsion fracture
Elbow	Fracture	EFU	Fractured olecranon	EL.30.13
Elbow	Fracture	EF3	Fractured radial head	EL.35.13	Radial head fracture
Elbow	Fracture	EFR	Avulsion fracture proximal radius	WR.30.14
Elbow	Bone stress injury	ES1	Elbow stress fracture	EL.30.18
Elbow	Bone contusion	EJX	Elbow bone bruise
Elbow	Avascular necrosis	EEP	Panner disease (elbow avascular necrosis)
Elbow	Physis injury	EGT	Traction injury to apophysis at elbow	EL.30.20
Elbow	Physis injury	EGM	Apophysitis medial epicondyle elbow	EL.30.14
Elbow	Physis injury	EGC	Capitellar osteochondrosis	EL.42.37	Little league elbow / osetochondritis dissecans
Elbow	Cartilage	EC1	Chondral lesion elbow (+/- loose bodies)	EL.40.21
Elbow	Cartilage	ECL	Loose Body in Elbow	EL.43.21	Elbow Loose body
Elbow	Cartilage	ECO	Osteochondrosis elbow	EL.40.21
Elbow	Arthritis	EA1	Elbow osteoarthritis	EL.41.34	Humero-ulnar degenerative/osteoarthritis
Elbow	Synovitis / capsulitis	EQ1	Elbow atraumatic synovitis	EL.41.30	Humero-ulnar Impingement Syndrome
Elbow	Synovitis / capsulitis	EQ4	Elbow posterior impingement/synovitis	EL.40.30
Elbow	Bursitis	EB1	Elbow olecranon bursitis	EL.41.31	Olecranon bursitis
Elbow	Ligament	ELJ	Sprained/jarred elbow	EL.90.00	Other elbow injury
Elbow	Ligament	EL1	Elbow medial collateral ligament strain or tear	EL.50.07
Elbow	Ligament	ELR	Elbow medial ligament rupture/grade 3 tear	EL.51.03	Ulnar collateral ligament 3° sprain -acute
Elbow	Ligament	ELM	Elbow medial ligament injury and CFO tear	EL.51.01	Ulnar collateral ligament 1° sprain -acute
Elbow	Ligament	ELA	Elbow hyperextension +/- strain anterior elbow structures	EL.50.07
Elbow	Ligament	ELZ	Other elbow strain not otherwise specified	EL.50.01	Elbow sprain -ill defined
Elbow	Joint sprain	ED1	Dislocated elbow	EL.50.10	Elbow dislocation
Elbow	Joint sprain	EDA	Anterion elbow dislocation	EL.40.10
Elbow	Joint sprain	EDP	Posterior elbow dislocation	EL.40.10
Elbow	Joint sprain	ED2	Dislocated radial head	EL.40.10
Elbow	Chronic instability	EU1	Elbow valgus instability	EL.51.04	Ulnar collateral ligament 1° sprain -chronic
Elbow	Chronic instability	EUX	Elbow Instability	EL.40.12
Elbow	Chronic instability	EU2	Elbow posterolateral instability	EL.40.12
Elbow	Contusion/vascular	EV1	Elbow contusion/haematoma	EL.60.24	Elbow contusion
Elbow	Laceration	EKX	Elbow laceration	EL.60.25	Elbow laceration
Elbow	Laceration	EK1	Elbow laceration deep	EL.60.25	Elbow laceration
Elbow	Abrasion	EII	Complication of elbow laceration including infection	EL.60.75
Elbow	Abrasion	EI1	Elbow abrasion superficial	EL.60.26	Elbow abrasion
Elbow	Stump injury	EWI	Infection of stump elbow	EL.91.75
Elbow	Stump injury	EWS	Stump trauma elbow	EL.91.44
Elbow	Pain without tissue type specified	EPX	Elbow pain without tissue type specified
Elbow	Unknown	EZ1	Elbow pain undiagnosed	EL.43.00	Radio-ulnar joint disorder
Elbow	Unknown	EZX	Elbow Injuries
Elbow	Unknown	EZZ	Elbow Pain/Injury not otherwise specified	EL.90.42
Elbow	Unknown	EZS	Post elbow surgery
Forearm	Muscle injury	RMT	Forearm muscle trigger pts
Forearm	Muscle injury	RM1	Forearm Muscle Injury	FA.13.07	Brachioradialis strain
Forearm	Muscle injury	RME	Forearm extensor muscle strain	FA.12.07	Forearm extensor muscle strain
Forearm	Muscle injury	RMF	Forearm flexor muscle strain	FA.11.07	Forearm flexor muscle strain
Forearm	Muscle contusion	RH1	Forearm contusion/haematoma	FA.60.24	Forearm Contusion
Forearm	Muscle compartment syndrome	RYC	Forearm compartment syndrome	FA.10.36	Forearm exertional compartment syndrome
Forearm	Tendinopathy	RTX	Forearm Tendon Injury	FA.10.28
Forearm	Tendinopathy	RTE	Forearm extensor tendon injury	FA.10.28
Forearm	Tendinopathy	RT1	Forearm extensor tendinopathy	FA.10.28
Forearm	Tendinopathy	RTY	Forearm extensor tenosynovitis	FA.40.29
Forearm	Tendinopathy	RTI	Intersection syndrome
Forearm	Tendinopathy	RTF	Forearm flexor tendon injury	FA.10.28
Forearm	Tendinopathy	RTS	Forearm splints/medial ulnar stress syndrome	FA.30.18
Forearm	Nerve injury	RNX	Forearm Neurological Injury
Forearm	Fracture	RF1	Fractured forearm bone(s)	FA.32.19	Radius greenstick fracture
Forearm	Fracture	RFC	Colles fracture radius	FA.30.13
Forearm	Fracture	RFD	Fractured distal radius	FA.30.13
Forearm	Fracture	RFB	Fracture radius and ulna midshaft	FA.30.13
Forearm	Fracture	RFR	Fracture radius midshaft	FA.30.13
Forearm	Fracture	RFG	Galleazzi fracture - midshaft radius fracture, dislocation DRUJ	FA.30.13
Forearm	Fracture	RFM	Fractured ulna midshaft	FA.33.13	Ulnar fracture
Forearm	Fracture	RFA	Monteggia Fracture - midshaft ulna fracture and dislocation radial head at elbow	FA.30.13
Forearm	Fracture	RFS	Smiths fracture distal radius	FA.30.13
Forearm	Fracture	RFU	Fracture of distal ulna	FA.30.13
Forearm	Bone stress injury	RSX	Forearm Stress Fracture	FA.30.18
Forearm	Bone stress injury	RS1	Stress fracture radius and/or ulna	FA.30.18
Forearm	Bone contusion	RJX	Forearm bone contusion
Forearm	Laceration	RK1	Complication of forearm laceration including infection	FA.60.25	Forearm laceration
Forearm	Abrasion	RIX	Forearm Abrasion	FA.60.26	Forearm abrasion
Forearm	Stump injury	RWI	Infection of stump forearm	FA.91.75
Forearm	Stump injury	RWS	Stump trauma forearm	FA.91.44
Forearm	Pain without tissue type specified	RP1	Other Stress/Overuse injuries to Forearm
Forearm	Unknown	RZX	Forearm Pain/Injury not otherwise specified	FA.90.00	Other forearm injury
Forearm	Unknown	RZ1	Forearm Pain/Injury undiagnosed	FA.90.42
Wrist	Muscle injury	WMX	Wrist and Hand Muscle Injury	HA.15.07	Intrinsic muscle strain
Wrist	Muscle contusion	WH1	Wrist bruising/haematoma	WR.60.24	Wrist contusion
Wrist	Tendinopathy	WT1	De Quervain's tenosynovitis	WR.13.28	DeQuervain's Disease
Wrist	Tendinopathy	WTX	Wrist Tendon Injury	WR.10.28
Wrist	Tendinopathy	WTT	Thumb tendon injury	WR.10.28
Wrist	Tendinopathy	WTD	Wrist extensor tendon injury	WR.14.28	Extensor Carpi Ulnaris Subluxation
Wrist	Tendinopathy	WTE	wrist extensor tenosynovitis/tendinopathy at wrist	WR.11.29	Wrist extensor tenosynovitis
Wrist	Tendinopathy	WTF	Wrist flexor tenosynovitis/tendinopathy	WR.12.28	Wirst flexor tendinopathy
Wrist	Tendinopathy	WT3	Rupture wrist flexor tendon	WR.10.09
Wrist	Tendinopathy	WT2	Wrist ganglion	WR.41.30	Dorsal wrist ganglion
Wrist	Tendinopathy	WT4	Carpal boss
Wrist	Tendon rupture	WRE	Other tenosynovitis/tendinopathy thumb	WR.40.28
Wrist	Tendon rupture	WR1	Rupture thumb extensor tendon (excl if complication of wrist fracture - see specific fracture)	WR.10.13
Wrist	Tendon rupture	WRD	Rupture wrist extensor tendon	HA.11.09	Extensor expansion tendon tear/rupture
Wrist	Nerve injury	WNX	Wrist Neurological Injury	WR.22.39	Ulnar nerve entrapment (Tunnel of Guyon)
Wrist	Nerve injury	WN1	Carpal Tunnel Syndrome	WR.21.39	Carpal tunnel syndrome
Wrist	Fracture	WF1	Fractured scaphoid	WR.32.13	Scaphoid fracture
Wrist	Fracture	WFR	Fracture of distal radius +/- ulna	WR.30.13
Wrist	Fracture	WFS	Fracture radial styloid	WR.30.13
Wrist	Fracture	WF3	Wrist fracture with complication (e.g. EPL rupture)	WR.30.13
Wrist	Fracture	WFU	Fracture of ulna styloid	WR.30.13
Wrist	Fracture	WFP	Fracture proximal pole scaphoid	WR.30.13
Wrist	Fracture	WFW	Fracture waist scaphoid	WR.30.13
Wrist	Fracture	WFD	Fracture distal pole scaphoid	WR.30.13
Wrist	Fracture	WFH	Fractured hamate	WR.39.13	Hamate fracture
Wrist	Fracture	WFO	Fractured hook of hamate	WR.39.14	Hook of hamate fracture
Wrist	Fracture	WFT	Fractured trapezium	WR.36.13	Trapezium fracture
Wrist	Fracture	WF2	Fracture other carpal bone	WR.30.13
Wrist	Fracture	WFM	Fracture multiple carpal bones	WR.30.13
Wrist	Bone stress injury	WSX	Wrist and Hand Stress/Overuse Injuries
Wrist	Bone stress injury	WS1	Carpal stress fracture	WR.30.18
Wrist	Bone stress injury	WSH	Hand stress fracture (incl thumb and fingers)	WR.30.18
Wrist	Bone contusion	WJ1	Other complication of wrist sprain
Wrist	Bone contusion	WJC	Other carpal ligament injury
Wrist	Bone contusion	WJ2	Distal radioulnar joint injury
Wrist	Avascular necrosis	WEN	Non union fractured scaphoid	WR.32.15	Scaphoid fracture-non-union
Wrist	Avascular necrosis	WEW	Avascular necrosis in wrist/hand	WR.30.35
Wrist	Avascular necrosis	WES	Avascular necrosis scaphoid	WR.32.35	Scaphoid avascular necrosis
Wrist	Avascular necrosis	WEL	Avascular necrosis lunate	WR.30.35
Wrist	Physis injury	WGT	Traction injury to apophysis at wrist/hand
Wrist	Physis injury	WGO	Osteochondrosis of wrist and hand	WR.33.35	Kienboch's disease
Wrist	Physis injury	WGR	Epiphysitis of distal radius	WR.40.20
Wrist	Cartilage	WC1	Wrist fibrocartilage tear	WR.48.21	Triangular fibrocartillage complex tear
Wrist	Cartilage	WCX	Wrist Osteochondral/Chondral Injury	WR.40.21
Wrist	Arthritis	WA1	Wrist Osteoarthritis	WR.40.34	Wrist degenerative/osteoarthritis
Wrist	Arthritis	WAW	Wrist osteoarthritis	WR.40.34	Wrist degenerative/osteoarthritis
Wrist	Arthritis	WAS	SLAC Wrist (post S-L tear)	WR.50.09
Wrist	Synovitis / capsulitis	WQW	Chronic synovitis of wrist	WR.40.30	Wrist capsulitis
Wrist	Synovitis / capsulitis	WQU	Ulnar abutment syndrome
Wrist	Ligament	WLJ	Sprained/jarred wrist jt	WR.50.01	Wrist sprain
Wrist	Ligament	WLS	Scapholunate ligament sprain
Wrist	Ligament	WLL	Scapholunate ligament sprain/tear	WR.53.10	Lunate dislocation
Wrist	Ligament	WLR	Scapholunate ligament rupture	WR.50.09
Wrist	Ligament	WL1	Lunate - triquetral sprain
Wrist	Joint sprain	WDX	Wrist and Hand Dislocations	WR.40.10
Wrist	Joint sprain	WDW	Radiocarpal joint dislocation	WR.40.10
Wrist	Joint sprain	WDD	Distal R/U joint dislocation	WR.51.10	Distal radio-ulnar joint dislocation
Wrist	Joint sprain	WD1	Dislocation through carpus	WR.40.10
Wrist	Joint sprain	WDC	Dislocation of CMC joint of fingers	WR.40.10
Wrist	Joint sprain	WDP	Dislocation of thumb joint	HA.52.10	Other metacarpophalyngeal joint dislocation
Wrist	Chronic instability	WUX	Chronic Wrist Instability	WR.40.12
Wrist	Chronic instability	WUW	Radiocarpal joint instability	WR.40.12
Wrist	Chronic instability	WUC	Carpal instability	WR.56.12	Mid-carpal instability
Wrist	Chronic instability	WUV	VISI wrist instability	WR.40.12
Wrist	Chronic instability	WU1	Scapholunate (DISI) instability	WR.52.10	Scapholunate dissociation
Wrist	Chronic instability	WU2	Distal radioulnar joint instability	WR.51.12	Distal radio-ulnar joint instablility
Wrist	Chronic instability	WUP	Thumb Instability	WR.40.12
Wrist	Contusion/vascular	WV1	Wrist and Hand Soft Tissue Bruising/Haematoma	WR.60.24	Wrist contusion
Wrist	Contusion/vascular	WVF	Finger bruising/haematoma	WR.60.24	Wrist contusion
Wrist	Contusion/vascular	WVX	Wrist and Hand Vascular Injury	WR.70.45
Wrist	Contusion/vascular	WVA	Wrist and hand arterial injury (incl aneurysm)	WR.70.45
Wrist	Laceration	WKL	Palmar hand laceration	WR.60.25	Wrist laceration
Wrist	Laceration	WKW	Wrist laceration/abrasion	WR.60.25	Wrist laceration
Wrist	Laceration	WK1	Dorsal wrist laceration/abrasion
Wrist	Laceration	WKV	Volar wrist laceration/abrasion
Wrist	Laceration	WKPU	Laceration of thumb nail/nailbed	WR.60.25	Wrist laceration
Wrist	Laceration	WKB	Blisters of wrist/hand (incl fingers/thumb)	WR.60.27
Wrist	Laceration	WKC	Callous of Wrist/hand (incl fingers/thumb)
Wrist	Abrasion	WIX	Wrist abrasion
Wrist	Pain without tissue type specified	WP1	Wrist and Hand Impingement/Synovitis	WR.40.33	Wrist impingement
Wrist	Unknown	WZ1	Other Wrist Pain/Injury not otherwise specified	WR.90.42
Wrist	Unknown	WZW	Other wrist pain NOS	WR.40.30	Wrist capsulitis
Wrist	Unknown	PZH	Other hand pain NOS	HA.90.00	Other hand injury
Wrist	Unknown	WZZ	Wrist or hand pain undiagnosed	WR.90.42
Wrist	Unknown	WZS	Post surgery on wrist joint
Hand	Muscle contusion	PH1	Hand muscle bruising/haematoma	HA.60.24	Hand contusion
Hand	Tendinopathy	PTT	Trigger thumb
Hand	Tendinopathy	PTF	Finger flexor tenosynovitis/tendinopathy	HA.40.28
Hand	Tendinopathy	PT1	Index finger flexor tendon rupture	HA.10.09
Hand	Tendinopathy	PTD	Dupytren's Contracture	HA.14.28	Dupuytren's contacture
Hand	Tendinopathy	PTG	Trigger Finger	HA.12.28	Trigger finger
Hand	Tendinopathy	PTP	Flexor pully Injury fingers
Hand	Tendon rupture	PR1	Finger extensor tendon injury (incl mallet finger +/- avulsion fracture distal phalanx)	HA.10.14
Hand	Tendon rupture	PRF	Flexor tendon rupture finger(s)	HA.10.09
Hand	Tendon rupture	PRX	Rupture thumb flexor tendon	HA.10.09
Hand	Tendon rupture	PRD	Finger(s) extensor tenosynovitis/tendinopathy	HA.40.28
Hand	Tendon rupture	PRA	Index finger extensor tendon rupture	HA.10.09
Hand	Tendon rupture	PRB	Middle finger extensor tendon rupture	HA.10.09
Hand	Tendon rupture	PRC	Ring finger extensor tendon rupture	HA.10.09
Hand	Tendon rupture	PRE	Little finger extensor tendon rupture	HA.10.09
Hand	Tendon rupture	PRT	Middle finger flexor tendon rupture	HA.10.09
Hand	Tendon rupture	PR4	Ring finger flexor tendon rupture	HA.10.09
Hand	Tendon rupture	PR5	Little finger flexor tendon rupture	HA.10.09
Hand	Fracture	PFA	Avulsion fracture phalanx	HA.55.01	Finger proximal interphalyngeal joint sprain
Hand	Fracture	PFT	Fractured thumb	HA.35.13	Thumb phalanx fracture
Hand	Fracture	PF7	Fracture shaft 1st metacarpal	HA.32.13	First metacarpal fracture
Hand	Fracture	PF1	Bennett's fracture/dislocation thumb	HA.32.16	First metacarpal fracture/dislocation (Bennett's)
Hand	Fracture	PFM	Fracture metacarpals 2- 5	HA.34.13	Other metacarpal fracture
Hand	Fracture	PFE	Fifth metacarpal fracture	HA.30.13
Hand	Fracture	PF3	Fractured phalanx	HA.30.13
Hand	Fracture	PFR	Rolando fracture (comminuted fracture base 1st MC)	HA.30.13
Hand	Fracture	PFF	Fracture proximal phalanx of thumb	HA.30.13
Hand	Fracture	PFK	Fracture distal phalanx thumb	HA.30.13
Hand	Fracture	PFX	Multiple metacarpal fractures	HA.30.13
Hand	Fracture	PFB	Fracture 2nd metacarpal	HA.33.13	Second metacarpal fracture
Hand	Fracture	PFC	Fracture 3rd metacarpal	HA.30.13
Hand	Fracture	PF2	Fracture 4th metacarpal	HA.30.13
Hand	Fracture	PFG	Proximal phalanx fracture index finger	HA.30.13
Hand	Fracture	PFH	Proximal phalanx fracture middle finger	HA.30.13
Hand	Fracture	PFI	Proximal phalanx fracture ringfinger	HA.30.13
Hand	Fracture	PFJ	Proximal phalanx fracture little finger	HA.30.13
Hand	Fracture	PFL	Middle phalanx fracture index finger	HA.30.13
Hand	Fracture	PFD	Middle phalanx fracture middle finger	HA.30.13
Hand	Fracture	PFN	Middle phalanx fracture ringfinger	HA.30.13
Hand	Fracture	PFO	Middle phalanx fracture little finger	HA.30.13
Hand	Fracture	PFP	Distal phalanx fracture index finger	HA.30.13
Hand	Fracture	PFQ	Distal phalanx fracture middle finger	HA.30.13
Hand	Fracture	PFS	Distal phalanx fracture ringfinger	HA.30.13
Hand	Fracture	PF5	Distal phalanx fracture little finger	HA.30.13
Hand	Fracture	PFU	Multiple phalangeal fractures fingers	HA.30.13
Hand	Bone stress injury	PSS	Sesamoiditis of thumb
Hand	Bone contusion	PJX	Hand bone contusion
Hand	Arthritis	PAT	Osteoarthritis of thumb	HA.40.34
Hand	Arthritis	PAC	CMC joint OA
Hand	Arthritis	PAM	MCP jt OA
Hand	Arthritis	PAI	Interphalangeal joint OA
Hand	Arthritis	PAF	Osteoarthritis of fingers	HA.40.34
Hand	Arthritis	PAP	PIP jt OA fingers
Hand	Arthritis	PA1	DIP jt OA fingers
Hand	Synovitis / capsulitis	PQX	Chronic synovitis of thumb	HA.40.30
Hand	Synovitis / capsulitis	PQC	Chronic synovitis of 1st CMC joint	HA.40.30
Hand	Synovitis / capsulitis	PQM	Chronic synovitis of 1st MCP joint	HA.40.30
Hand	Synovitis / capsulitis	PQI	Chronic Synovitis of IP joint thumb	HA.40.30
Hand	Synovitis / capsulitis	PQF	Chronic synovitis of fingers	HA.40.30
Hand	Synovitis / capsulitis	PQJ	Chronic synovitis of MCP joint(s)	HA.40.30
Hand	Synovitis / capsulitis	PQP	Chronic synovitis of PIP joint(s)	HA.40.30
Hand	Synovitis / capsulitis	PQD	Chronic synovitis of DIP joint(s)	HA.40.30
Hand	Synovitis / capsulitis	PQ1	Complication from finger fracture (incl malunion)	HA.30.13
Hand	Ligament	PL2	Other hand or finger ligament tear	HA.50.09
Hand	Ligament	PL1	Spr ulnar collateral ligament (Skier's) thumb
Hand	Ligament	PLT	Thumb IP joint sprain
Hand	Ligament	PLM	Metacarpaophalangeal joint sprain	HA.53.01	Other metacarpophalyngeal joint sprain
Hand	Ligament	PLS	Thumb sprain
Hand	Ligament	PLC	Thumb CMC jt sprain
Hand	Ligament	PLU	Thumb UCL lig rupture at MCP joint (skier's thumb)	HA.51.03	Ulnar collateral ligament 3° sprain -acute (skier's thumb)
Hand	Ligament	PLR	Thumb RCL lig rupture at MCP joint	HA.40.09
Hand	Joint sprain	PD1	Disl metacarpophalangeal or interphalangeal jt	HA.55.10	Finger proximal interphalyngeal joint dislocation
Hand	Joint sprain	PDQ	Dislocation CMC joint thumb	HA.40.10
Hand	Joint sprain	PDT	Dislocation of MCP joint thumb	HA.40.10
Hand	Joint sprain	PDF	Dislocation of IP joint thumb	HA.54.10	Thumb interphalyngeal joint dislocation
Hand	Joint sprain	PDA	Complication of thumb joint dislocation excl instability - see WUPX	HA.40.10
Hand	Joint sprain	PDW	Dislocation of MCP joint finger(s)	HA.51.10	First metacarpophalyngeal joint dislocation
Hand	Joint sprain	PDB	MCP jt dislocation index finger	HA.40.10
Hand	Joint sprain	PDC	MCP jt dislocation middle finger	HA.40.10
Hand	Joint sprain	PDD	MCP jt dislocation ring finger	HA.40.10
Hand	Joint sprain	PD5	MCP jt dislocation little finger	HA.40.10
Hand	Joint sprain	PDE	MCP jt dislocation of two or more fingers	HA.40.10
Hand	Joint sprain	PDG	PIP joint dislocation index finger	HA.40.10
Hand	Joint sprain	PDH	PIP joint dislocation middle finger	HA.40.10
Hand	Joint sprain	PDI	PIP joint dislocation ring finger	HA.40.10
Hand	Joint sprain	PDJ	PIP joint dislocation little finger	HA.40.10
Hand	Joint sprain	PDK	DIP joint dislocation index finger	HA.40.10
Hand	Joint sprain	PDL	DIP joint dislocation middle finger	HA.40.10
Hand	Joint sprain	PDM	DIP joint dislocation ring finger	HA.40.10
Hand	Joint sprain	PDS	DIP joint dislocation little finger	HA.40.10
Hand	Joint sprain	PDN	Multiple PIP and/or DIP joint dislocations	HA.40.10
Hand	Joint sprain	PDV	Finger joint dislocation with volar plate injury	HA.40.10
Hand	Joint sprain	PDY	PIP joint dislocation finger unknown	HA.40.10
Hand	Joint sprain	PDX	DIP joint dislocation finger unknown	HA.40.10
Hand	Chronic instability	PUQ	Complication of MCP jt sprain excl cronic instability
Hand	Chronic instability	PUK	Complication of finger MCP jt sprain
Hand	Chronic instability	PUD	Complication of PIP/DIP joint dislocation	HA.40.10
Hand	Chronic instability	PUC	Instability 1st CMC joint	HA.40.12
Hand	Chronic instability	PUM	Instability 1st MCP joint	HA.51.04	Ulnar collateral ligament 1° sprain -chronic
Hand	Chronic instability	PUI	Interphalangeal joint instability of thumb	HA.40.12
Hand	Chronic instability	PUF	Finger MCP joint instability	HA.40.12
Hand	Chronic instability	PU1	Finger PIP or DIP joint instability	HA.40.12
Hand	Contusion/vascular	PVT	Thumb bruising/haematoma	HA.60.24	Hand contusion
Hand	Contusion/vascular	PVH	Thumbnail haematoma	HA.60.33
Hand	Contusion/vascular	PVN	Fingernail haematoma	HA.62.24	Subungal hematoma
Hand	Laceration	PKF	Finger laceration	HA.60.25	Hand laceration
Hand	Laceration	PKN	Laceration of fingernail/nailbed	HA.62.09	Nail avulsion
Hand	Laceration	PK2	Wrist and Hand Laceration/Abrasion	HA.60.27	Hand blister
Hand	Laceration	PKH	Hand laceration	HA.60.25	Extensor expansion tendon laceration
Hand	Laceration	PKD	Dorsal hand laceration
Hand	Laceration	PKT	Thumb laceration
Hand	Abrasion	PIX	Hand abrasion
Hand	Pain without tissue type specified	PP2	Chronic regional pain syndrome	WR.20.43	Wrist reflex sympathetic dystrophy
Hand	Pain without tissue type specified	PPT	Other thumb pain NOS	HA.90.42
Hand	Pain without tissue type specified	PP1	Other finger pain NOS	HA.90.42
Hand	Unknown	PZS	Post hand surgery	HA.90.83
Chest	Muscle injury	CM2	Chest muscle strain	CH.11.07	Intercostal muscle strain
Chest	Muscle contusion	CH2	Chest Wall Soft Tissue Bruising/Haematoma	CH.60.24	Thoracic contusion
Chest	Tendinopathy	CT1	Intercostal tendinopathy	CH.10.28
Chest	Fracture	CF1	Fractured rib(s)	CH.32.13	Rib fracture
Chest	Fracture	CFX	Chest Fracture(s)	CH.30.13
Chest	Fracture	CFC	Fracture of costochondral margin	CH.40.13
Chest	Fracture	CFA	Fracture upper rib (1- 4)	CH.32.13	Rib fracture
Chest	Fracture	CFB	Fracture Middle rib (5 - 9)	CH.32.13	Rib fracture
Chest	Fracture	CFL	Fracture lower rib (10 - 12	CH.32.13	Rib fracture
Chest	Fracture	CFM	Fracture multiple ribs	CH.32.13	Rib fracture
Chest	Fracture	CF2	Sternal fracture	CH.33.13	Sternum / xyphoid fracture
Chest	Bone stress injury	CS1	Stress fracture rib(s)	CH.32.18	Rib stress fracture
Chest	Bone stress injury	CSR	Stress reaction rib(s)	CH.32.18	Rib stress fracture
Chest	Bone contusion	CJ1	Bruised ribs/chest wall	CH.32.24	Rib contusion
Chest	Bone contusion	CJS	Bruised sternum
Chest	Cartilage	CC1	Costal cartilage/costochondral jt injury	CH.40.21
Chest	Cartilage	CCR	Costochondritis	CH.44.30	Rib cartilage Injury / costochondritis
Chest	Cartilage	CCC	Fracture of costochondral margin	CH.40.13
Chest	Synovitis / capsulitis	CQC	Synovitis of Chest Joint	CH.40.30
Chest	Synovitis / capsulitis	CQS	Synovitis of Sternoclavicular joint	CH.40.30
Chest	Ligament	CL1	Costovertebral joint sprains
Chest	Ligament	CLX	Chest Joint Sprains
Chest	Ligament	CLS	Sternoclavicular joint sprains	SH.51.01	Sternoclavicular joint 1° sprain -acute
Chest	Ligament	CLA	Anterior sternoclavicular (S/C) joint sprain
Chest	Ligament	CLP	Posterior sternoclavicular joint sprain
Chest	Joint sprain	CDX	Chest Dislocations	CH.40.10
Chest	Joint sprain	CDS	Sternoclavicular joint dislocation	CH.40.10
Chest	Joint sprain	CDP	Posterior sternoclavicular joint dislocation	CH.40.10
Chest	Joint sprain	CDC	Costochondral joint dislocation	CH.40.10
Chest	Chronic instability	CUS	Sternoclavicular joint instability	CH.40.12
Chest	Chronic instability	CUC	Costochondral joint instability	CH.40.12
Chest	Laceration	CKX	Chest Wall laceration/Abrasion	CH.60.25	Chest laceration
Chest	Laceration	CK8	Truncal laceration/abrasion not requiring suturing
Chest	Abrasion	CII	Chest wall abrasion (incl complications)	CH.90.75
Chest	Organ trauma	COX	Lung Injury	CH.80.13
Chest	Organ trauma	COP	Pneumothorax	CH.80.46	Pnuemothorax - Traumatic
Chest	Organ trauma	CO1	Haemothorax	CH.80.46	Pnuemothorax - Traumatic
Chest	Pain without tissue type specified	CPX	Chest injury without tissue type specified
Chest	Unknown	CZ1	Chest pain undiagnosed	CH.90.42
Thoracic Spine	Muscle injury	DMM	Thoracic Muscle Strain/Spasm/Trigger Points	TS.11.07	Parathoracic muscle strain
Thoracic Spine	Muscle injury	DM1	Thoracic extensor muscle strain	TS.10.07
Thoracic Spine	Muscle contusion	DH1	Thoracic Soft Tissue Bruising/Haematoma	CH.60.24	Thoracic contusion
Thoracic Spine	Fracture	DFX	Thoracic Spine Fracture	TS.31.13	Thoracic Spine fracture
Thoracic Spine	Fracture	DF1	Fracture thoracic vertebral body	TS.30.13
Thoracic Spine	Fracture	DFT	Fracture transverse or posterior process thoracic spine	TS.30.13
Thoracic Spine	Bone stress injury	DSX	Thoracic spine stress/compression fracture
Thoracic Spine	Bone contusion	DJX	Thoracic spine bone contusion
Thoracic Spine	Physis injury	DGS	Osteochondrosis Spine	TS.40.21
Thoracic Spine	Physis injury	DG1	Scheuermanns disease	TS.31.20	Scheurmann's disease
Thoracic Spine	Cartilage	DC1	Thoracic disc prolapse	TS.52.33	Thoracic disc herniation
Thoracic Spine	Arthritis	DAX	Thoracic spine Osteoarthritis	TS.40.34
Thoracic Spine	Arthritis	DA1	Facet joint OA thoracic spine
Thoracic Spine	Synovitis / capsulitis	DQV	Inflammation/stiffness of costovertebral joints	TS.40.33
Thoracic Spine	Ligament	DLJ	Thoracic spine Joint Injury
Thoracic Spine	Ligament	DL1	Thoracic facet joint sprain	TS.41.30	Thoracic facet syndrome
Thoracic Spine	Chronic instability	DUV	Costovertebral joint instability	TS.43.30	Costovertebral dysfunction
Thoracic Spine	Laceration	DKX	Thoracic Laceration
Thoracic Spine	Abrasion	DIX	Thoracic abrasion (including infection)	TS.60.75
Thoracic Spine	Pain without tissue type specified	DP1	Chronic thoracic functional pain	TS.41.30	Thoracic facet syndrome
Thoracic Spine	Pain without tissue type specified	DPY	Thoracic muscle trigger points
Thoracic Spine	Pain without tissue type specified	DPP	Thoracic Functional Pain	TS.90.42
Thoracic Spine	Unknown	DZ1	Thoracic pain undiagnosed	TS.90.42
Thoracic Spine	Unknown	DZZ	Abdominal pain not otherwise specified	TS.90.42
Thoracic Spine	Unknown	DZX	Thoracic Pain/Injury not otherwise specified	CH.90.00	Other chest injury
Lumbar Spine	Muscle injury	LMT	Lumbar trigger pts or muscle spasm
Lumbar Spine	Muscle injury	LMB	Buttock Muscle Strain/Spasm/Trigger Points	LS.10.07
Lumbar Spine	Muscle injury	LMG	Gluteal muscle strain	HI.14.07	Lateral rotator strain
Lumbar Spine	Muscle injury	LM1	Lumbar Spine muscle and Tendon Strain/Spasm/Trigger Points	LS.13.07	Paralumbar muscle strain
Lumbar Spine	Muscle injury	LMP	Piriformis muscle strain	LS.10.07
Lumbar Spine	Muscle injury	LMZ	Buttock muscle trigger points
Lumbar Spine	Muscle contusion	LH1	Lumbar contusion/haematoma	LS.90.24	Low Back Contusion
Lumbar Spine	Muscle contusion	LHB	Buttock Soft Tissue Bruising/Haematoma	LS.60.24
Lumbar Spine	Muscle contusion	LHS	SIJ bruising/haematoma	LS.60.24
Lumbar Spine	Tendinopathy	LTP	Piriformis tendinopathy	LS.10.28
Lumbar Spine	Nerve injury	LN1	Lumbar spinal injury
Lumbar Spine	Nerve injury	LNP	Piriformis syndrome (with sciatic nerve impingement)	HI.20.42	Piriformis Syndrome
Lumbar Spine	Nerve injury	LNX	Lumbar Spine Neurological Injury
Lumbar Spine	Nerve injury	LNFX	Lumbar spinal fracture with associated neurological injury	LS.30.13
Lumbar Spine	Nerve injury	LNFC	Lumbar spinal fracture with spinal cord/cauda equina injury	LS.30.13
Lumbar Spine	Nerve injury	LNA	Lumbosacral Nerve root impingement due to foraminal stenosis bony and disc	LS.22.39	Lumbar nerve root impingement
Lumbar Spine	Nerve injury	LN2	Lumbar nerve root impingement due to foraminal stenosis bony and disc	LS.20.40
Lumbar Spine	Nerve injury	LN3	Lumbar Spinal canal stenosis	LS.31.00	Spinal stenosis
Lumbar Spine	Nerve injury	LN4	Lumbosacral nerve stretch/traction injury	LS.21.39	Sciatica
Lumbar Spine	Nerve injury	LNZ	Other lumbosacral nerve injury	LS.20.41	Lumbar neuroma
Lumbar Spine	Nerve injury	LNB	Buttock Nerve Injury	LS.23.39	Pudendal nerve injury
Lumbar Spine	Fracture	LFX	Lumbar Spine Fracture	LS.31.13	Lumbar spine fracture
Lumbar Spine	Fracture	LFV	Lumbar spine vertebral body fracture	LS.30.13
Lumbar Spine	Fracture	LFT	Fracture transverse process(es)	LS.30.13
Lumbar Spine	Fracture	LFSX	Lumbar spinous process fracture	LS.30.13
Lumbar Spine	Fracture	LFA	Lumbar pars interarticularis acute fracture	LS.30.13
Lumbar Spine	Fracture	LFD	Lumbar pedical fracture	LS.30.13
Lumbar Spine	Fracture	LFM	Multiple lumbar spine fractures	LS.30.13
Lumbar Spine	Fracture	LFZ	Other lumbar spine fracture	LS.30.13
Lumbar Spine	Fracture	LFC	Complication of lumbar fracture	LS.30.13
Lumbar Spine	Fracture	LFP	Pelvic fracture(s)	LS.30.13
Lumbar Spine	Fracture	LFS	Fractured sacrum	LS.32.13	Sacrum / coccyx fracture
Lumbar Spine	Fracture	LFI	Fractured ischium	TH.34.13	Ischium fracture
Lumbar Spine	Bone stress injury	LSL	Spondylolysthesis lumbar
Lumbar Spine	Bone stress injury	LS1	Stress fracture lumbar spine	LS.30.18
Lumbar Spine	Bone stress injury	LS2	Lumbar stress reaction	LS.30.18
Lumbar Spine	Bone stress injury	LSS	Stress fracture sacrum	LS.30.18
Lumbar Spine	Bone stress injury	LSIS	Stress fracture ischium	LS.30.18
Lumbar Spine	Bone stress injury	LSP	Pars interarticularis stress fracture	LS.31.18	Pars stress fracture/ reaction
Lumbar Spine	Bone stress injury	LSU	Pars stress fracture L1 - L3	LS.30.18
Lumbar Spine	Bone stress injury	LSE	Pars stress fracture L4	LS.30.18
Lumbar Spine	Bone stress injury	LSF	Pars stress fracture L5	LS.30.18
Lumbar Spine	Bone stress injury	LSM	Multiple (incl bilateral) pars stress fractures	LS.30.18
Lumbar Spine	Bone stress injury	LS3	Lumbar pedicle stress fracture	LS.30.18
Lumbar Spine	Bone stress injury	LSLX	Other lumbar spine stress fracture	LS.30.18
Lumbar Spine	Bone stress injury	LSI	Stress fracture ilium	TH.30.18
Lumbar Spine	Bone stress injury	LSC	Stress fracture coccyx	LS.30.18
Lumbar Spine	Bone stress injury	LSG	Other stress fracture pelvis	LS.30.18
Lumbar Spine	Bone contusion	LJX	Lumbar spine/buttock bone contusion
Lumbar Spine	Physis injury	LGJ	Lumbar Spine Joint Injury
Lumbar Spine	Cartilage	LC1	Disc prolapse/disruption
Lumbar Spine	Cartilage	LC2	Disc degeneration	LS.42.42	Lumbar degenerative disc disease
Lumbar Spine	Cartilage	LC3	Lumbar disc annular tear	LS.40.09
Lumbar Spine	Cartilage	LCP	Lumbar disc prolapse	LS.42.33	Lumbar disc herniation
Lumbar Spine	Arthritis	LAX	Osteoarthritis Lumbosacral spine	LS.31.33	Kissing spine
Lumbar Spine	Arthritis	LA1	Facet joint OA lumbosacral spine	LS.41.34	Lumbar facet osteoarthritis
Lumbar Spine	Arthritis	LAD	Degenerative L4/L5 disc disease	LS.40.79
Lumbar Spine	Arthritis	LAE	Degenerative L5/S1 disc disease	LS.40.79
Lumbar Spine	Arthritis	LAM	Degenerative disc disease multiple levels lumbar spine	LS.40.79
Lumbar Spine	Ligament	LL1	Lumbar region ligament sprain
Lumbar Spine	Ligament	LLF	Lumbar facet joint sprain
Lumbar Spine	Ligament	LLI	Iliolumbar Ligament pain	LS.50.42
Lumbar Spine	Ligament	LLS	Sacroiliac joint sprain
Lumbar Spine	Ligament	LLC	Sacrococcygeal joint injury/pain	LS.32.33	coccydynia
Lumbar Spine	Ligament	LLJ	Spinal joint sprain
Lumbar Spine	Chronic instability	LU1	Lumbar Instability	LS.40.12
Lumbar Spine	Chronic instability	LUSX	Spondylolisthesis any Level	LS.33.18	Spodylolisthesis
Lumbar Spine	Chronic instability	LUT	Grade 2-3 Spondylolisthesis lumbar spine
Lumbar Spine	Chronic instability	LUSD	Grade 4 Spondylolisthesis lumbar spine
Lumbar Spine	Chronic instability	LUR	Retrolisthesis lumbar spine
Lumbar Spine	Chronic instability	LUP	Lumbosacral instability	LS.40.12
Lumbar Spine	Chronic instability	LUS	Sacroiliac Joint Instability	LS.43.30	Sacroiliac asymmetry/dysfunction
Lumbar Spine	Laceration	LKX	Lumbar Laceration	LS.60.25	Low back laceraton
Lumbar Spine	Laceration	LK1	Complication of lumbar laceration/abrasion incl infection	LS.60.75
Lumbar Spine	Laceration	LKB	Pelvic/Buttock Laceration/Abrasion
Lumbar Spine	Abrasion	LIB	Complication of buttock abrasion incl infection	LS.60.75
Lumbar Spine	Pain without tissue type specified	LP1	Chronic lumbar functional pain	LS.41.30	Lumbar facet syndrome
Lumbar Spine	Pain without tissue type specified	LPS	Sacroiliac Joint Injury/Pain	LS.40.42
Lumbar Spine	Unknown	LZ1	Lumbar pain undiagnosed	LS.90.42	Non-specific low back pain / mechanical pain
Lumbar Spine	Unknown	LZB	Buttock Pain not otherwise specified	LS.90.42	Non-specific low back pain / mechanical pain
Lumbar Spine	Unknown	LZX	Lumbar Pain/Injury nor otherwise specified	LS.32.18	Spondylolysis
Lumbar Spine	Unknown	LZH	Lumbar pain with hamstring referral	LS.20.42
Lumbar Spine	Unknown	LZN	Lumbar Pain/Injury nor otherwise specified	LS.90.42	Non-specific low back pain / mechanical pain
Lumbar Spine	Unknown	LZU	Buttock pain undiagnosed	LS.90.42	Non-specific low back pain / mechanical pain
Abdomen	Muscle injury	OMT	Abdominal muscle trigger pts or spasm
Abdomen	Muscle injury	OMO	Abdominal oblique muscle strain	AB.10.07
Abdomen	Muscle injury	OMM	Truncal Muscle Strain	AB.10.07
Abdomen	Muscle injury	OMA	Trasversus abdominis muscle strain	AB.10.07
Abdomen	Muscle injury	OM1	Truncal Muscle Trigger Points/Spasm
Abdomen	Muscle injury	OMY	Rectus abdominis trigger points/spasm	AB.10.08	Abdominal "stitch" / exercise induced diaphragmatic spasm
Abdomen	Muscle injury	OMW	Winded	AB.80.46
Abdomen	Muscle contusion	OH1	Abdominopelvic Soft Tissue Bruising/Haematoma	AB.60.24
Abdomen	Tendinopathy	OT2	Costolliac impingement
Abdomen	Tendinopathy	OTH	Sports hernia/abdominal tendinopathy	HI.10.28
Abdomen	Tendinopathy	OTX	Abdominal tendon Injury	AB.10.28
Abdomen	Tendinopathy	OTR	Rectus abdominus tendinopathy	AB.10.28
Abdomen	Tendinopathy	OT1	Divarication of rectus abdominis	AB.11.09	Diastasis Rectii
Abdomen	Tendinopathy	OTU	Unbilical Hernia
Abdomen	Tendinopathy	OTA	Abdominal tendon insertion injury	HI.10.28
Abdomen	Tendinopathy	OTS	Abdominal tendon insertion strain	HI.10.07
Abdomen	Tendinopathy	OTI	Direct inguinal hernia
Abdomen	Tendon rupture	ORI	Abdominal tendon insertion rupture	HI.10.09
Abdomen	Laceration	OKX	Truncal Laceration/Abrasion	AB.60.25	Abdomen laceration
Abdomen	Laceration	OKS	Truncal laceration requiring suturing	AB.60.25	Abdomen laceration
Abdomen	Abrasion	OIX	Complication of abrasion to trunk - including infection	AB.60.75
Abdomen	Organ trauma	OOH	Trunk and Abdominal Injury	AB.90.00	Other abdominal injury
Abdomen	Organ trauma	OOX	Abdominal organ Injury	AB.80.46
Abdomen	Organ trauma	OOS	Spleen trauma	AB.82.46	Spleen contusion / injury
Abdomen	Organ trauma	OO1	Intestinal trauma	AB.80.46
Abdomen	Organ trauma	OOL	Liver trauma	AB.81.46	Liver contusion / injury
Abdomen	Organ trauma	OOP	Pancreatic trauma	AB.80.46
Abdomen	Organ trauma	OOK	Kidney trauma	AB.83.46	Kidney Contusion
Abdomen	Organ trauma	OOM	Multiple organ trauma	AB.80.46
Abdomen	Organ trauma	OOZ	Other organ trauma not otherwise specified	AB.80.46
Abdomen	Organ trauma	OOB	Bladder trauma	AB.80.46
Abdomen	Pain without tissue type specified	OPY	Abdominal muscle cramps	AB.10.08	Abdominal "stitch" / exercise induced diaphragmatic spasm
Abdomen	Unknown	OZ1	Abdominal pain undiagnosed	AB.90.42
Abdomen	Unknown	OZX	Abdominal pain not otherwise specified	GI.04.83	Abdominal pain / illness -Misc
Groin/hip	Muscle injury	GMR	Rectus abdominus strain	AB.11.07	Rectus Abdominus strain
Groin/hip	Muscle injury	GM1	Hip flexor muscle strain	HI.16.07	Tensor Fasciea Latae strain
Groin/hip	Muscle injury	GMY	Groin soreness or trigger points
Groin/hip	Muscle injury	GMA	Proximal adductor trigger points
Groin/hip	Muscle injury	GM8	Hip and Groin Muscle Strain/Tear	HI.10.07
Groin/hip	Muscle injury	GMFP	Psoas muscle strain/tear	HI.10.07
Groin/hip	Muscle injury	GMP	Iliopsoas muscle strain/tear	HI.11.07	Iliopsoas strain
Groin/hip	Muscle injury	GMI	Trigger points illiopsoas
Groin/hip	Muscle contusion	GH1	contusion/haematoma, hip region	HI.60.24	Hip Contusion
Groin/hip	Muscle contusion	GHL	Labial bruising/haematoma	HI.60.24	Hip Contusion
Groin/hip	Muscle contusion	GHZ	Other hip/groin bruising/haematoma	HI.60.24	Hip Contusion
Groin/hip	Tendinopathy	GT3	Iliopsoas tendinopathy/bursitis	HI.42.31	Iliopsoas bursitis
Groin/hip	Tendinopathy	GT1	Adductor origin tendinopathy	HI.10.28
Groin/hip	Tendinopathy	GTO	Abdominal tendon insertion tendinopathy	HI.10.28
Groin/hip	Tendinopathy	GTS	Snapping psoas tendon	HI.10.28
Groin/hip	Tendinopathy	GTX	Hip and Groin Tendon Injuries	HI.10.28
Groin/hip	Tendinopathy	GTF	Iliopsoas tendon injury	HI.10.28
Groin/hip	Tendinopathy	GTFT	Iliopsoas tendinopathy	HI.10.28
Groin/hip	Tendinopathy	GTFS	Iliopsoas tendon strain	HI.10.07
Groin/hip	Tendinopathy	GTFR	Iliopsoas tendon rupture	HI.10.09
Groin/hip	Tendinopathy	GTR	Rectus femoris tendon injury	HI.10.28
Groin/hip	Tendinopathy	GTRS	Rectus femoris tendon strain	HI.10.07
Groin/hip	Tendinopathy	GTST	Sartorius tendinopathy	HI.10.28
Groin/hip	Tendinopathy	GTSS	Sartorius tendon strain	TH.14.07	Sartorius strain
Groin/hip	Tendinopathy	GTD	Unspecified or multiple adductor tendon injury	HI.10.28
Groin/hip	Tendinopathy	GTL	Adductor longus tendon injury	HI.10.28
Groin/hip	Tendinopathy	GTLS	Adductor longus tendon strain	HI.17.07	Proximal adductor strain
Groin/hip	Tendinopathy	GTM	Adductor magnus tendon injury	HI.10.28
Groin/hip	Tendinopathy	GTMT	Adductor magnus tendinopathy	HI.10.28
Groin/hip	Tendinopathy	GTMS	Adductor magnus tendon strain	HI.10.07
Groin/hip	Tendinopathy	GTH	Sportsman's hernia	HI.18.07	Sports Hernia
Groin/hip	Tendinopathy	GTHI	Indirect inguinal hernia
Groin/hip	Tendinopathy	GTHF	Femoral hernia
Groin/hip	Tendon rupture	GRR	Rectus femoris origin tendon rupture	HI.10.09
Groin/hip	Tendon rupture	GRS	Sartorius tendon rupture	HI.10.09
Groin/hip	Tendon rupture	GRA	Adductor longus tendon rupture	HI.17.09	Proximal adductor tear/rupture
Groin/hip	Tendon rupture	GRM	Adductor magnus tendon rupture	HI.10.09
Groin/hip	Nerve injury	GNX	Groin Neurovascular Injuries	HI.70.45
Groin/hip	Nerve injury	GNE	Nerve Entrapment Groin	HI.20.39	Ilioinguinal Nerve Entrapment
Groin/hip	Nerve injury	GN1	Genitofemoral nerve entrapment	HI.20.39	Ilioinguinal Nerve Entrapment
Groin/hip	Nerve injury	GNI	Ilioinguinal nerve entrapment	HI.20.39	Ilioinguinal Nerve Entrapment
Groin/hip	Nerve injury	GNO	Obturator nerve entrapment	HI.22.39	Obturator nerve entrapment
Groin/hip	Nerve injury	GVH	Vascular Injury Hip Joint	HI.71.45	Hip arterial injury / disorder
Groin/hip	Nerve injury	GNM	Thigh Neurological Injury
Groin/hip	Fracture	GF3	Fractured Ilium	HI.33.13	Ilium fracture
Groin/hip	Fracture	GF2	Fractured coccyx	HI.30.13
Groin/hip	Fracture	GFX	Hip/Groin Fractures	HI.30.13
Groin/hip	Fracture	GFF	Femoral fracture	HI.36.13	Intertrochanteric fracture
Groin/hip	Fracture	GFN	Fractured neck of femur	HI.34.13	Femoral neck / head fracture
Groin/hip	Fracture	GF1	Acetabular fracture	HI.37.13	Acetablular fracture
Groin/hip	Fracture	GFP	Fracture pubic ramus	HI.35.13	Pubic Fracture
Groin/hip	Fracture	GFPS	Fracture superior pubic ramus	HI.30.13
Groin/hip	Fracture	GFPI	Fracture inferior pubic ramus	HI.30.13
Groin/hip	Bone stress injury	GS3	Stress fracture pelvic bone	HI.30.18
Groin/hip	Bone stress injury	GS1	Osteitis pubis	HI.35.32	Osteitis Pubis
Groin/hip	Bone stress injury	GSM	Multiple stress fractures pelvis	HI.30.18
Groin/hip	Bone stress injury	GSX	Hip/Groin Stress Fracture	HI.30.18
Groin/hip	Bone stress injury	GSN	Femoral neck stress fracture	HI.34.18	Femoral neck stress fracture
Groin/hip	Bone stress injury	GSFS	Stress fracture superior cortex femoral neck	HI.30.18
Groin/hip	Bone stress injury	GSFI	Stress fracture inferior cortex femoral neck	HI.30.18
Groin/hip	Bone stress injury	GS2	Stress fracture through femoral neck (both cortices)	HI.30.18
Groin/hip	Bone stress injury	GSP	Pelvic stress fracture	HI.35.18	Pubic stress fracture
Groin/hip	Bone stress injury	GSPI	Stress fracture inferior pubic ramus	HI.30.18
Groin/hip	Bone contusion	GJX	Groin/hip bone contusion
Groin/hip	Avascular necrosis	GEVA	Avascular necrosis femoral head	HI.30.35
Groin/hip	Avascular necrosis	GEP	Perthes disease	HI.35.35	Legg-Perthes
Groin/hip	Avascular necrosis	GEA	Hip avascular necrosis	HI.35.35	Legg-Perthes
Groin/hip	Physis injury	GG1	Traction injury to apophysis at buttock and pelvis	TH.34.20	Ischium growth plate / physeal injury
Groin/hip	Physis injury	GGO	Apophysitis/avulsion fracture iliac crest	HI.33.20	Ilium growth plate / physeal injury
Groin/hip	Physis injury	GGH	Apophysitis/avulsion fracture Iischial tuberosity	TH.34.14	Ischium avulsion fracture
Groin/hip	Physis injury	GGT	Traction injury to apophysis at groin/hip joint	HI.30.20
Groin/hip	Physis injury	GGS	Apophysitis/avulsion fracture ASIS	HI.32.20	ASIS apophysitis / avulsion
Groin/hip	Physis injury	GGR	Apophysitis/avulsion fracture AIIS	HI.34.20	AIIS apophysitis / avulsion
Groin/hip	Physis injury	GGA	Other apophysitis/avulsion fracture groin/hip	HI.30.14
Groin/hip	Physis injury	GGF	Osteochondroses of hip joint	HI.40.21	Hip chondromalacia
Groin/hip	Physis injury	GG2	Slipped capital femoral epiphysis	HI.35.20	Slipped capitus femorus
Groin/hip	Cartilage	GCL	Labral tear, hip joint	HI.45.21	Hip labral tear
Groin/hip	Cartilage	GC1	Hip Joint Chondral/Osteochondral Injury	HI.40.21	Hip chondromalacia
Groin/hip	Cartilage	GCC	Hip joint chondral lesion	HI.40.21	Hip chondromalacia
Groin/hip	Arthritis	GA1	Hip jt osteoarthritis	HI.40.34	Hip degenerative/osteoarthritis
Groin/hip	Arthritis	GAX	Hip/Groin Arthritis	HI.40.34	Hip degenerative/osteoarthritis
Groin/hip	Synovitis / capsulitis	GQX	Hip Joint Inflammation/Synovitis/Other Biomechanical Lesion	HI.44.30	Hip loose body
Groin/hip	Synovitis / capsulitis	GQH	Synovitis of hip joint	HI.43.30	Hip capsulitis
Groin/hip	Bursitis	GBT	Trochanteric bursitis	HI.41.31	Greater trochanteric bursitis / snapping hip syndrome
Groin/hip	Ligament	GLH	Hip joint sprain/jar
Groin/hip	Joint sprain	GD1	Hip Joint Dislocation	HI.40.10
Groin/hip	Chronic instability	GUH	Instability of Hip Jt	HI.40.12
Groin/hip	Chronic instability	GUP	Pubic symphysis instability	HI.54.09	Symphysis Pubis Diastasis
Groin/hip	Laceration	GKX	Hip and Groin Laceration	HI.60.25	Hip laceration
Groin/hip	Laceration	GK1	Complication of laceration including infection	HI.60.75
Groin/hip	Abrasion	GIX	Groin/hip abrasion
Groin/hip	Organ trauma	GO2	Testicular/scrotal contusion/haematoma	HI.80.46	Testicular Contusion
Groin/hip	Organ trauma	GOP	Pelvic Organ Injury	AB.80.46
Groin/hip	Organ trauma	GOT	Groin Organ Damage	HI.80.46	Testicular Contusion
Groin/hip	Organ trauma	GOR	Testicular rupture	HI.80.09
Groin/hip	Organ trauma	GOU	Penile injury	HI.80.46	Testicular Contusion
Groin/hip	Organ trauma	GO1	Ruptured penis/urethra	HI.80.09
Groin/hip	Pain without tissue type specified	GP1	Chronic non specific /functional groin pain	HI.90.42
Groin/hip	Pain without tissue type specified	GPY	Other Stress/Overuse Injury Hip and Groin
Groin/hip	Unknown	GZ1	Groin pain undiagnosed	HI.90.42
Groin/hip	Unknown	GZN	Pelvic/Buttock Pain not otherwise specified	HI.90.42
Groin/hip	Unknown	GZH	Clicking hip	HI.40.28
Groin/hip	Unknown	GZX	Hip/Groin Pain Not otherwise specified	HI.20.41	Hip neuroma
Groin/hip	Unknown	GZS	Post hip/groin Surgery	HI.90.83
Thigh	Muscle injury	TM1	Hamstring strain/tear	TH.12.07	Hamstring strain
Thigh	Muscle injury	TM2	Quadriceps strain/tear	TH.11.07	Quadraceps strain
Thigh	Muscle injury	TMA	Distal adductor strain	TH.10.07
Thigh	Muscle injury	TMH	Hamstring cramping during exercise	TH.10.72
Thigh	Muscle injury	TMT	Rectus femoris trigger points
Thigh	Muscle injury	TMX	Gluteus maximus strain	HI.12.07	Gluteus maximius strain
Thigh	Muscle injury	TMG	Gluteus medius/minimus strain	HI.13.07	Gluteus medius strain
Thigh	Muscle injury	TMZ	Thigh Muscle strain/Spasm/Trigger Points	HI.17.08	Proximal adductor spasm
Thigh	Muscle injury	TMB	Biceps femoris strain grade 1 - 2	TH.10.07
Thigh	Muscle injury	TMS	Semimembranosis/tendinosis strain (grade 1 - 2)	TH.10.07
Thigh	Muscle injury	TMHR	Grade 3 hamstring strain	TH.10.07
Thigh	Muscle injury	TMR	Rectus femoris strain	TH.10.07
Thigh	Muscle injury	TMQ	Rectus femoris rupture	TH.11.09	Quadraceps tear/rupture
Thigh	Muscle injury	TMV	Other quadricep strain	TH.10.07
Thigh	Muscle injury	TMAL	Adductor longus strain	TH.10.07
Thigh	Muscle injury	TMM	Adductor magnus strain	TH.10.07
Thigh	Muscle injury	TMAR	Adductor muscle rupture/grade 3 strain	TH.10.07
Thigh	Muscle injury	TML	Back referred muscle tightness
Thigh	Muscle injury	TMW	Back referred hamstring tightness
Thigh	Muscle injury	TMC	Thigh muscle cramping suring exercise	TH.10.72
Thigh	Muscle injury	TMCQ	Quadricep cramping during exercise	TH.10.72
Thigh	Muscle injury	TMCA	Adductor muscle cramping suring exercise	TH.10.72
Thigh	Muscle injury	TMP	Thigh muscle trigger points
Thigh	Muscle injury	TMY	Lateral hamstring trigger points	HI.12.07	Gluteus maximius strain
Thigh	Muscle injury	TMGX	Thigh muscle wasting
Thigh	Muscle injury	TMGQ	Quadriceps wasting	TH.20.42
Thigh	Muscle contusion	TH1	Contusion/haematoma of thigh	TH.11.24	Quadraceps contusion
Thigh	Muscle contusion	THI	Bruising/haematoma iliac crest/glut medius	HI.33.24	Hip Pointer (Iliac Crest Contusion)
Thigh	Muscle contusion	THT	Thigh muscle haematoma	TH.10.24
Thigh	Muscle contusion	THD	Adductor muscle haematoma	HI.17.24	Proximal adductor contusion
Thigh	Muscle contusion	THH	Hamstring muscle haematoma	TH.12.24	Hamstring contusion
Thigh	Muscle contusion	THQ	Quadriceps muscle haematoma	TH.10.24
Thigh	Muscle contusion	THV	Iliotibial band haematoma	TH.60.33
Thigh	Muscle contusion	THA	Acute artherial bleed thigh	TH.70.45
Thigh	Muscle contusion	THM	Myositis ossificans thigh	TH.11.33	Quadraceps myositis ossificans
Thigh	Muscle contusion	THZ	Other soft tissue bruising/haematoma not otherwise specified	TH.60.24
Thigh	Muscle compartment syndrome	TYC	Compartment Syndrome of Thigh	TH.11.36	Thigh exertional compartment syndrome
Thigh	Tendinopathy	TTG	Gluteal tendinopathy/enthesopathy	TH.10.28
Thigh	Tendinopathy	TT1	Hamstring origin tendinopathy	TH.10.28
Thigh	Tendinopathy	TTR	Rectus femoris origin tendinopathy	TH.10.28
Thigh	Tendinopathy	TTS	Sartorius tendon injury	TH.10.28
Thigh	Tendinopathy	TTM	Gluteus med/min tendinopathy	HI.41.31	Greater trochanteric bursitis / snapping hip syndrome
Thigh	Tendinopathy	TTH	Hamstring tendinopathy with ischial bursitis	TH.44.31	Ischial bursitis
Thigh	Tendinopathy	TT8	Thigh Tendon Injuries	TH.10.28
Thigh	Tendinopathy	TTP	Tenoperiostitis of Thigh	TH.32.32	Femoral periostitis
Thigh	Tendon rupture	TRM	Gluteus med/min tendon rupture	TH.10.09
Thigh	Tendon rupture	TR1	Hamstring tendon injury	TH.10.28
Thigh	Tendon rupture	TRH	Hamstring origin tendon rupture	TH.10.13
Thigh	Nerve injury	TN1	Nerve entrapment in thigh	TH.20.39
Thigh	Nerve injury	TNEL	Lateral cutaneous nerve of thigh entrapment	HI.21.42	Meralgia paresthetica
Thigh	Fracture	TFX	Thigh Fractures	TH.32.13	Femoral fracture
Thigh	Fracture	TF1	Fractured femoral shaft	TH.30.13
Thigh	Bone stress injury	TS1	Thigh Stress Fractures	TH.30.18
Thigh	Bone stress injury	TSF	Femoral shaft stress fracture	TH.32.18	Femoral stress fracture
Thigh	Bone contusion	TJF	Femur bone contusion
Thigh	Physis injury	TGX	Thigh region physis injury
Thigh	Laceration	TKX	Thigh Laceration/Abrasion	TH.60.25	Thigh laceration
Thigh	Laceration	TK1	Complication of laceration incl. infection	TH.60.75
Thigh	Abrasion	TIX	Thigh abrasion
Thigh	Stump injury	TWI	Infection of stump thigh	TH.91.75
Thigh	Stump injury	TWS	Stump trauma thigh	TH.91.44
Thigh	Pain without tissue type specified	TPZ	Thigh pain without tissue type specified
Thigh	Unknown	TZS	Other stress/Overuse Injuries to Thigh
Thigh	Unknown	TZ1	Thigh pain/Injury Not otherwise specified	TH.10.36	Thigh acute compartment syndrome
Thigh	Unknown	TZX	Thigh Pain Not otherwise specified	TH.90.42
Thigh	Unknown	TZZ	Thigh pain undiagnosed	TH.90.42
Knee	Muscle injury	KMX	Knee Muscle Strain/Spasm/Trigger Points	KN.10.07
Knee	Muscle injury	KMP	Popliteus muscle strain	KN.10.07
Knee	Muscle contusion	KHQ	Distal quadricep haematoma	KN.60.33
Knee	Muscle contusion	KH1	Other soft tissue bruising/haematoma knee	KN.60.24	Knee contusion
Knee	Tendinopathy	KT7	Quadriceps tendinopathy +/- suprapatellar bursitis	KN.15.28	Quadriceps tendinopathy
Knee	Tendinopathy	KT2	Patellar tendinopathy	KN.14.28	Patellar tendinopathy
Knee	Tendinopathy	KTS	Medial hamstring insertion tendonitis/pes anserinus bursitis	KN.12.28	Pes anserine tendinopathy
Knee	Tendinopathy	KTB	Lateral hamstring insertion tendonitis	KN.11.28	Biceps Femoris tendinopathy
Knee	Tendinopathy	KT5	Popliteus tendinopathy/strain	KN.16.28	Popliteus tendinopathy
Knee	Tendinopathy	KT1	Iliotibial band syndrome	KN.13.28	Iliotibial band friction syndrome
Knee	Tendinopathy	KT3	Knee Tendon Injury	KN.10.28
Knee	Tendinopathy	KTQ	Quadriceps tendon injury	KN.10.28
Knee	Tendinopathy	KTP	Patellar Tendon Injury	KN.14.33	Patellar tendon cystic degeneration
Knee	Tendinopathy	KTPI	Insertional Patellar tendon pathology, incl intratend ossicle	KN.10.28
Knee	Tendinopathy	KTH	Medial hamstring tendon strain at knee	KN.10.07
Knee	Tendinopathy	KT9	Lateral hamstring tendon strain at knee	KN.10.07
Knee	Tendinopathy	KTM	Gastrocnemius tendon injury	KN.10.28
Knee	Tendinopathy	KTG	Medial gastroc tendinopathy knee	KN.10.28
Knee	Tendinopathy	KTL	Lateral gastroc tendinopathy knee	KN.10.28
Knee	Tendon rupture	KR2	Medial hamstring tendon rupture	KN.10.09
Knee	Tendon rupture	KRQ	Quadriceps tendon rupture	KN.15.09	Quadriceps tendon tear/rupture
Knee	Tendon rupture	KR1	Patellar tendon rupture	KN.14.09	Patellar tendon tear/rupture
Knee	Tendon rupture	KRH	Hamstring tendon rupture	KN.10.09
Knee	Tendon rupture	KRL	Lateral hamstring tendon rupture at knee	KN.10.09
Knee	Fracture	KF1	Patella fracture	KN.35.13	Patellar fracture
Knee	Fracture	KFX	Knee Fractures	KN.30.13
Knee	Fracture	KFF	Distal femoral fracture	KN.30.13
Knee	Fracture	KF2	Intraarticular femoral fracture	KN.32.13	Intrarticular fracture of femur
Knee	Fracture	KFT	Proximal tibial fracture	KN.33.14	Tibial spine avulsion
Knee	Fracture	KFI	Intraarticular tibial fracture	KN.33.13	Tibial plateau fracture
Knee	Bone stress injury	KSX	Knee Stress Fracture	KN.30.18
Knee	Bone stress injury	KSP	Patellar stress fracture	KN.30.18
Knee	Bone stress injury	KS1	Distal femoral stress fracture	KN.30.18
Knee	Bone contusion	KJX	Knee bone contusion
Knee	Physis injury	KGO	Osgood-Schlatter syndrome	KN.33.20	Osgood-Schlatter's Disease
Knee	Physis injury	KGPB	PFS related to bipartite patella
Knee	Physis injury	KGT	Traction injury to apophysis at knee	KN.30.20
Knee	Physis injury	KGS	Apophysitis/avulsion fracture distal pole patella (SLJ)	KN.35.20	Sinding-Larson-Johanson Syndrome
Knee	Physis injury	KGB	Epiphysitis of medial tibial plateau (Blount's Disease)	KN.40.20
Knee	Cartilage	KC8	Knee joint cartilage injury (unspecified)
Knee	Cartilage	KC1	Knee articular cartilage damage	TH.42.17	Femoral osteochondral fracture
Knee	Cartilage	KC2	Medial meniscal tear	KN.45.21	Medial meniscal tear
Knee	Cartilage	KC3	Lateral meniscal tear	KN.46.21	Lateral meniscal tear
Knee	Cartilage	KCP	Patellofemoral jt chondral pain	KN.42.33	Post-traumatic patellofemoral pain
Knee	Cartilage	KCM	Medial femoral condyle osteochondral injury	KN.40.21	Loose body of knee
Knee	Cartilage	KCK	Lateral femoral condyle osteochondral injury	KN.40.21	Loose body of knee
Knee	Cartilage	KCT	Tibial osteochondral injury	KN.40.21	Loose body of knee
Knee	Cartilage	KCU	Patellofemoral osteochondral injury	KN.42.21	Patellofemoral chondromalacia
Knee	Cartilage	KCL	Knee cartilage injury with loose bodies	KN.40.21	Loose body of knee
Knee	Cartilage	KCC	Lateral meniscal cyst	KN.40.21	Loose body of knee
Knee	Cartilage	KC5	Medial and lateral meniscal tears	KN.40.09
Knee	Cartilage	KCD	Degenerative meniscal tear	KN.40.09
Knee	Cartilage	KCB	Mixed osteochondral and meniscal injury	KN.40.21	Loose body of knee
Knee	Cartilage	KC4	Osteochondrosis of knee	KN.40.21	Loose body of knee
Knee	Cartilage	KCO	OCD Medial or lateral femoral condyle	KN.43.37	Femoral osteochondritis dissecans (OCD)
Knee	Cartilage	KC7	OCD Patella	KN.42.37	Patellofemoral osteochondritis dissecans (OCD)
Knee	Arthritis	KA1	Knee osteoarthritis	KN.40.34	Knee generalized osteoarthritis
Knee	Arthritis	KAP	Patellofemoral osteoarthritis	KN.42.34	Patellofemoral osteoarthritis
Knee	Arthritis	KAM	Medial compartment osteoarthritis knee	KN.40.34	Knee generalized osteoarthritis
Knee	Arthritis	KAL	Lateral compartment osteoarthritis knee	KN.43.34	Unicompartmental osteoarthritis
Knee	Arthritis	KAG	Bi or tri-comparmental osteoarthritis	KN.40.34	Knee generalized osteoarthritis
Knee	Arthritis	KAH	Post arthroplasty knee
Knee	Synovitis / capsulitis	KQS	Knee Joint synovitis	KN.40.30	Knee synovitis
Knee	Synovitis / capsulitis	KQB	Baker's cyst	KN.41.23	Baker's Cyst
Knee	Synovitis / capsulitis	KQH	Hoffa's fat pad impingement	KN.47.30	Fat pad syndrome / plica
Knee	Bursitis	KBP	Prepatellar bursitis	KN.40.31
Knee	Bursitis	KBI	Infrapatella fat pad contusion/haematoma +/- bursitis	KN.41.31	Knee bursitis - prepatellar, infrapatellar, pes anserine
Knee	Bursitis	KBPT	Traumatic knee bursitis	KN.40.31
Knee	Ligament	KL1	Anterior cruciate ligament injury	KN.50.07
Knee	Ligament	KL2	Posterior cruciate ligament (PCL) injury	KN.50.07
Knee	Ligament	KL3	Knee medial collateral lig injury	KN.50.09
Knee	Ligament	KL4	LCL strain/rupture	KN.52.01	Lateral collateral ligament 1° sprain- acute
Knee	Ligament	KL5	Knee posterolateral complex str/tear	KN.50.09
Knee	Ligament	KLZ	Knee Sprains/Ligament Injuries
Knee	Ligament	KLI	Partial ACL tear	KN.53.02	Anterior cruciate ligament partial tear- acute
Knee	Ligament	KLA	ACL rupture	KN.53.03	Anterior cruciate ligament complete tear- acute
Knee	Ligament	KLC	ACL strain/rupture with chondral/meniscal injury	KN.40.07
Knee	Ligament	KLG	ACL graft rupture	KN.53.09	Anterior cruciate ligament graft rupture
Knee	Ligament	KLQ	Partial PCL tear	KN.54.02	Posterior cruciate ligament partial tear- acute
Knee	Ligament	KLP	PCL rupture	KN.54.03	Posterior cruciate ligament complete tear- acute
Knee	Ligament	KLV	Grade 1 MCL tear knee	KN.51.01	Medial collateral ligament 1° sprain- acute
Knee	Ligament	KLW	Grade 2 MCL tear knee	KN.51.02	Medial collateral ligament 2° sprain- acute
Knee	Ligament	KLM	MCL rupture knee	KN.51.03	Medial collateral ligament 3° sprain- acute
Knee	Ligament	KLY	MCL strain/rupture with chondral/meniscal damage knee	KN.40.07
Knee	Ligament	KLS	Complication post MCL strain/rupture incl Pellegrini Steida lesion	KN.50.33	Pelligrini-Steida Syndrome
Knee	Ligament	KLL	Posterolateral corner and LCL ligament injuries knee
Knee	Ligament	KLT	PLC injury with chondral /meniscal injury	KN.40.21	Loose body of knee
Knee	Ligament	KLX	Combined ligament injuries knee
Knee	Ligament	KLK	Combined ligament injury with chondral/meniscal injury	KN.40.21	Loose body of knee
Knee	Joint sprain	KDS	Patellar subluxation	KN.40.11
Knee	Joint sprain	KD1	Dislocated patella	KN.55.10	Patellofemoral dislocation
Knee	Joint sprain	KDX	Knee Dislocation	KN.40.10
Knee	Joint sprain	KDP	Patellar dislocation with avulsion fracture patella	KN.30.14
Knee	Joint sprain	KDK	Knee dislocation	KN.56.10	Tibial-femoral dislocation
Knee	Joint sprain	KD2	Knee dislocation with neural or vascular complication	KN.40.10
Knee	Joint sprain	KDT	Superior tib fib joint dislocation	KN.57.10	Proximal tibio-fibular dislocation
Knee	Chronic instability	KUX	Knee Instability (chronic or recurrent subluxations)	KN.56.12	Tibial-femoral Functional Instability
Knee	Chronic instability	KU2	Patellar instability	KN.55.12	Patellofemoral functional instability
Knee	Chronic instability	KU1	Chronic ACL insufficiency	KN.53.05	Anterior cruciate ligament partial tear- chronic
Knee	Chronic instability	KUP	Chronic PCL insufficiency	KN.54.05	Posterior cruciate ligament partial tear- chronic
Knee	Chronic instability	KUM	Chronic MCL insufficiency	KN.51.04	Medial collateral ligament 1° sprain- chronic
Knee	Chronic instability	KUZ	Other instability	KN.40.12
Knee	Contusion/vascular	KV1	Knee contusion/haematoma (extraarticular)	KN.60.24	Knee contusion
Knee	Contusion/vascular	KVM	Knee MCL contusion	KN.50.24
Knee	Laceration	KK1	Lacerated knee	KN.60.25	Knee laceration
Knee	Laceration	KKS	Superficial knee laceration/abrasion
Knee	Laceration	KKD	Deep knee laceration - intraarticular	KN.60.25	Knee laceration
Knee	Abrasion	KIX	Knee abrasion
Knee	Stump injury	KWI	Infection of stump knee	KN.91.75
Knee	Stump injury	KWS	Stump trauma knee	KN.91.44
Knee	Pain without tissue type specified	KPR	PCL strain/rupture with associated chondral/meniscal injury	KN.40.07
Knee	Pain without tissue type specified	KP4	Knee Impingement/Synovitis/Biomechanical Lesion not associated with other conditions	KN.40.30	Knee synovitis
Knee	Pain without tissue type specified	KPA	Patellofemoral pain with patellar tendinopathy	KN.10.28
Knee	Pain without tissue type specified	KP3	Synovial plica of knee	KN.40.30	Knee synovitis
Knee	Pain without tissue type specified	KPX	Knee Pain/Injury Not otherwise specified	KN.90.42
Knee	Unknown	KZ1	Knee Pain/Injury Not otherwise specified	KN.20.43	Knee reflex sympathetic dystrophy
Knee	Unknown	KZS	Post knee Surgery	KN.90.83
Knee	Unknown	KZX	Thigh pain/Injury Not otherwise specified	KN.90.42
Knee	Unknown	KZZ	Knee pain undiagnosed	KN.90.42
Knee	Unknown	KZ2	Knee haemarthrosis cause undiagnosed
Knee	Unknown	KZA	Post knee reconstruction	KN.90.83
Lower leg	Muscle injury	QM1	Gastrocnemius muscle injury/strain	LE.11.07	Gastrocnemius strain
Lower leg	Muscle injury	QMS	Soleus muscle strain	LE.12.07	Soleus strain
Lower leg	Muscle injury	QMT	Calf muscle cramps/spasm	LE.10.08
Lower leg	Muscle injury	QMX	Lower leg muscle Injury	LE.10.07	Other leg muscle strain
Lower leg	Muscle injury	QMA	Anterior compartment muscle injury	LE.10.36	Anterior exertional compartment syndrome
Lower leg	Muscle injury	QMLX	Lateral compartment muscle injury	LE.10.36	Anterior exertional compartment syndrome
Lower leg	Muscle injury	QMM	Medial gastroc strain	LE.10.07	Other leg muscle strain
Lower leg	Muscle injury	QML	Lateral gastroc strain	LE.10.07	Other leg muscle strain
Lower leg	Muscle injury	QMSA	Soleus strain a/w accessory soleus	LE.10.07	Other leg muscle strain
Lower leg	Muscle injury	QMD	Delayed onset muscle soreness
Lower leg	Muscle injury	QMYG	Gastroc muscle trigger points/spasm	LE.10.08
Lower leg	Muscle injury	QMYP	Peroneal trigger points/spasm	LE.10.08
Lower leg	Muscle injury	QMP	Tibialis posterior strain	LE.13.07	Tibialis posterior strain
Lower leg	Muscle contusion	QH1	Leg Soft Tissue Bruising/Haematoma	LE.60.24	Leg contusion
Lower leg	Muscle contusion	QH2	Calf contusion/haematoma	LE.10.24
Lower leg	Muscle contusion	QHM	Lower leg muscle haematoma	LE.10.24
Lower leg	Muscle contusion	QHA	Tib anterior haematoma	LE.60.33
Lower leg	Muscle contusion	QHP	Peroneal Haematoma	LE.60.33
Lower leg	Muscle contusion	QHZ	Other soft tissue bruising/haematoma not otherwise specified	LE.60.24	Leg contusion
Lower leg	Muscle compartment syndrome	QYP	Posterior compartment syndrome	LE.20.36
Lower leg	Muscle compartment syndrome	QYA	Anterior compartment syndrome	LE.10.36	Anterior exertional compartment syndrome
Lower leg	Muscle compartment syndrome	QYD	Deep posterior compartment syndrome	LE.13.36	Deep posterior exertional compartment syndrome
Lower leg	Muscle compartment syndrome	QYL	Lateral (peroneal) compartment syndrome	LE.11.36	Lateral exertional compartment syndrome
Lower leg	Muscle compartment syndrome	QYM	Compartment syndrome multiple sites lower leg	LE.20.36
Lower leg	Muscle compartment syndrome	QYB	Tenoperiostitis of lower leg	LE.32.32	Tibial periostitis
Lower leg	Muscle compartment syndrome	QY2	Acute anterior compartment syndrome	LE.30.13
Lower leg	Muscle compartment syndrome	QYF	Other acute compartment syndrome to lower leg	LE.12.36	Acute compartment syndrome
Lower leg	Muscle compartment syndrome	QYS	Post compartment release surgery	LE.90.83
Lower leg	Tendinopathy	QTT	Anterior shin splints
Lower leg	Tendinopathy	QT1	Medial Tibial Stress Syndrome ('shin splints')	LE.32.42	Medial tibial stress syndrome
Lower leg	Tendinopathy	QTA	Achilles tendinopathy	LE.16.28	Achilles tendon cystic degeneration
Lower leg	Tendinopathy	QTB	Achilles enthesopathy with retrocalcaneal bursitis	LE.40.31
Lower leg	Tendinopathy	QTS	Post Achilles tendon surgery	LE.10.28
Lower leg	Tendon rupture	QRA	Achilles tendon rupture	LE.16.09	Achilles tendon rupture
Lower leg	Tendon rupture	QRM	Midsubstance achilles tendon rupture	LE.10.09
Lower leg	Tendon rupture	QRI	Insertional achilles tendon rupture	LE.10.09
Lower leg	Nerve injury	QNX	Neurological Injury of Lower Leg	LE.21.39	Common peroneal nerve injury
Lower leg	Nerve injury	QN1	Peroneal nerve palsy (with foot drop)	LE.20.39
Lower leg	Fracture	QFX	Lower Leg Fractures	LE.32.19	Tibial greenstick fracture
Lower leg	Fracture	QFZ	Fractured Midshaft Tibia +/- Fibula	LE.30.13
Lower leg	Fracture	QFO	Fractured midshaft tibia	LE.32.13	Tibial fracture
Lower leg	Fracture	QFT	Fractured midshaft tibia and fibula	LE.30.13
Lower leg	Fracture	QF1	Compound midshaft fractured tibia +/- fibula	LE.30.13
Lower leg	Fracture	QFQ	Fractured tibia +/- fibula with other complication (e.g. compartment syndrome)	LE.32.15	Tibial fracture- non-union
Lower leg	Fracture	QFF	Fractured fibula	LE.33.13	Fibular fracture
Lower leg	Fracture	QFH	Fractured proximal fibula	KN.34.13	Fibular head fracture
Lower leg	Fracture	QFM	Fractured mishaft fibula	LE.30.13
Lower leg	Fracture	QF2	Fractured distal shaft fibula	LE.30.13
Lower leg	Fracture	QFS	Fractured mid-fibula with associated syndesmosis injury ankle	LE.30.13
Lower leg	Fracture	QFN	Fractured fibula with associated peroneal nerve injury	LE.20.13
Lower leg	Bone stress injury	QS1	Proximal tibial stress fracture	LE.30.18
Lower leg	Bone stress injury	QST	Stress fracture tibia	LE.32.18	Tibial stress fracture
Lower leg	Bone stress injury	QSA	Stress fracture anterior cortex tibia	LE.30.18
Lower leg	Bone stress injury	QSP	Stress fracture posteromedial tibia	LE.30.18
Lower leg	Bone stress injury	QS2	Stress fracture fibula	LE.33.18	Fibular stress fracture
Lower leg	Bone stress injury	QSX	Fractured fibula	LE.30.13
Lower leg	Bone stress injury	QSL	Stress fracture fibula at ankle	LE.30.18
Lower leg	Bone contusion	QJX	Lower leg bone contusion
Lower leg	Arthritis	QAS	Post lower leg surgery	LE.90.83
Lower leg	Synovitis / capsulitis	QQ1	Ruptured Baker's Cyst	LE.90.09
Lower leg	Bursitis	QBX	Bursitis not otherwise specified	AN.44.31	Medial malleolus Bursitis
Lower leg	Bursitis	QBC	Calcaneal bursitis (pump bump)	FO.31.32	Pump bumps
Lower leg	Ligament	QL1	Sprained superior tibiofibular jt
Lower leg	Contusion/vascular	QVT	Pretibial periosteal bruising/haematoma	LE.60.24	Leg contusion
Lower leg	Contusion/vascular	QVX	Vascular Injury Lower Leg	LE.70.45
Lower leg	Contusion/vascular	QVV	Other vascular injury to lower leg	LE.70.45
Lower leg	Contusion/vascular	QV4	Popliteal artery entrapment	LE.71.45	Popliteal artery entrapment
Lower leg	Laceration	QK1	Lower Leg Laceration	LE.60.25	Leg laceration
Lower leg	Laceration	QKXI	Infection as complication of lower leg laceration/abrasion	LE.60.75
Lower leg	Laceration	QKXQ	Other complication of lower leg laceration/abrasion
Lower leg	Laceration	QK2	Calf laceration/abrasion
Lower leg	Abrasion	QI1	Lower leg soft tissue infection	LE.90.75
Lower leg	Abrasion	QIS	Shin abrasion	LE.60.26	Leg abrasion
Lower leg	Stump injury	QWI	Infection of stump lower leg	LE.91.75
Lower leg	Stump injury	QWS	Stump trauma lower limb	LE.91.44
Lower leg	Pain without tissue type specified	QPS	Soleus Trigger points/Spasm	LE.10.08
Lower leg	Pain without tissue type specified	QPY	Other Leg Overuse Injury
Lower leg	Unknown	QZ1	Other Lower Leg Pain/Injury not otherwise specified	LE.20.43	Leg reflex sympathetic dystrophy
Lower leg	Unknown	QZZ	Lower leg pain undiagnosed	LE.90.42
Ankle	Tendinopathy	AT7	Flexor Hallucis Longus tendinopathy	AN.12.28
Ankle	Tendinopathy	AT6	Peroneal tendinopathy	AN.10.28
Ankle	Tendinopathy	ATX	Ankle tendon tnjury	AN.10.28
Ankle	Tendinopathy	ATE	Extensor tendon injuries at ankle	LE.14.07	Tibialis anterior strain
Ankle	Tendinopathy	AT5	Tibialis anterior tenosynovitis	AN.11.29	Ankle extensor tenonsynovitis (including lace bite)
Ankle	Tendinopathy	ATP	Peroneal tendon subluxation/dislocation	AN.15.11	Peroneus tendon subluxation
Ankle	Tendon rupture	ARP	Tibialias posterior tendon rupture	AN.13.09	Tibialis posterior tendon rupture
Ankle	Tendon rupture	ARH	Flexor Hallucis Longus rupture	AN.10.09
Ankle	Nerve injury	ANT	Tarsal tunnel syndrome	AN.21.39	Tarsal tunnel syndrome
Ankle	Nerve injury	ANX	Nerve Injury at Ankle	AN.20.41	Ankle neuroma
Ankle	Nerve injury	ANC	Calcaneal nerve entrapment	AN.20.39
Ankle	Nerve injury	ANM	Medial calcaneal nerve entrapment	AN.20.39
Ankle	Fracture	AFM	Medial malleolus fracture	AN.32.13	Medial Malleolus fracture
Ankle	Fracture	AFL	Lateral malleolus fracture	AN.33.13	Lateral Malleolus fracture
Ankle	Fracture	AF1	Fracture ankle	AN.30.13	Ankle fracture -Misc
Ankle	Fracture	AFP	Fracture posterior malleolus	AN.30.13	Ankle fracture -Misc
Ankle	Fracture	AFB	Bimalleolar fracture	AN.30.13	Ankle fracture -Misc
Ankle	Fracture	AFX	Trimalleolar fracture	AN.30.13	Ankle fracture -Misc
Ankle	Fracture	AFD	Ankle fracture with diastasis of syndesmosis	AN.30.13	Ankle fracture -Misc
Ankle	Fracture	AFN	Fractured talar neck	AN.30.13	Ankle fracture -Misc
Ankle	Fracture	AFS	Fractured lateral process talus	AN.30.13	Ankle fracture -Misc
Ankle	Fracture	AFT	Fractured talar dome	AN.30.13	Ankle fracture -Misc
Ankle	Fracture	AFO	Fractured os trigonum	AN.30.13	Ankle fracture -Misc
Ankle	Fracture	AFG	Fractured posterior process talus	AN.30.13	Ankle fracture -Misc
Ankle	Fracture	AF2	Fractured talus	AN.30.13	Ankle fracture -Misc
Ankle	Bone stress injury	ASM	Stress fracture medial malleolus	AN.30.18
Ankle	Bone stress injury	ASL	Stress fracture lateral malleolus	AN.30.18
Ankle	Bone stress injury	ASX	Ankle stress fracture	AN.30.18
Ankle	Bone stress injury	ASC	Stress injury calcaneus	AN.30.18
Ankle	Bone stress injury	AS1	Stress fracture talus	AN.34.18	Talus stress fracture
Ankle	Bone contusion	AJT	Talar dome bone bruise	AN.34.24	Talar dome contusion
Ankle	Bone contusion	AJX	Ankle bone contusion
Ankle	Avascular necrosis	AEX	Ankle avascular necrosis
Ankle	Physis injury	AGA	Traction injury to apophysis ankle	AN.30.20
Ankle	Physis injury	AGC	Apophysitis/avulsion fracture to calcaneus (Severs Dx)	FO.31.20	Calcaneal apohysitis/ Sever's disease
Ankle	Physis injury	AGT	Osteochondrosis of ankle	AN.40.21
Ankle	Cartilage	AC1	Ankle osteochondral Injuries	AN.41.17	Talus osteochondral fracture
Ankle	Arthritis	AA1	Ankle joint osteoarthritis	AN.40.34	Ankle degenerative/ostoearthritis
Ankle	Synovitis / capsulitis	AQS	Ankle joint synovitis	AN.40.30
Ankle	Synovitis / capsulitis	AQA	Ankle anterior impingement	AN.42.30	Anterior ankle impingement
Ankle	Synovitis / capsulitis	AQP	Posterior impingement ankle	AN.43.30	Posterior ankle impingement
Ankle	Synovitis / capsulitis	AQX	Ankle synovitis/Impingement/Bursitis	AN.40.30
Ankle	Ligament	ALS	Inferior tibiofibular syndesmosis sprain	AN.56.01	Tibiofibular ligament syndesmosis (high ankle) 1° sprain -acute
Ankle	Ligament	AL1	Sprain lateral collateral ligament ankle	AN.53.01	Anterior talofibular ligament 1° sprain -acute
Ankle	Ligament	AL2	Sprain medial collateral (deltoid) ligament ankle	AN.51.01	Deltoid ligament 1° sprain -acute
Ankle	Ligament	ALJ	Ankle sprains	AN.32.14	Medial Malleolus avulsion fracture
Ankle	Ligament	ALR	Lateral ligaments rupture (grade 3 injury)	AN.33.14	Lateral Malleolus avulsion fracture
Ankle	Ligament	ALC	Calcaneofibular ligament sprain	AN.54.01	Calcaneofibular ligament 1° sprain -acute
Ankle	Ligament	ALA	Anterior talofibular ligament sprain	AN.53.01	Anterior talofibular ligament 1° sprain -acute
Ankle	Ligament	ALM	Ankle multiple ligaments sprain
Ankle	Joint sprain	AD1	Ankle dislocation
Ankle	Chronic instability	AUX	Chronic Ankle Instability	AN.50.12	Ankle functional instability
Ankle	Chronic instability	AUM	Chronic medial instability	AN.51.04	Deltoid ligament 1° sprain -chronic
Ankle	Chronic instability	AU1	Chronic lateral instability	AN.52.04	Lateral ligament complex 1° sprain -chronic
Ankle	Contusion/vascular	AV1	Ankle contusion/haematoma	AN.32.24	Medial Malleolus contusion
Ankle	Laceration	AKX	Ankle laceration	AN.60.25	Ankle laceration
Ankle	Laceration	AKI	Complication of ankle laceration incl infection	AN.60.25	Ankle laceration
Ankle	Laceration	AKS	Superficial ankle laceration/abrasion	AN.60.25	Ankle laceration
Ankle	Laceration	AKD	Deep (intraarticular) laceration ankle	AN.60.25	Ankle laceration
Ankle	Abrasion	AIX	Ankle abrasion
Ankle	Pain without tissue type specified	AP2	Functional pain ankle	AN.20.43	Ankle reflex sympathetic dystrophy
Ankle	Unknown	AZS	Post ankle surgery
Ankle	Unknown	AZ1	Ankle Pain/Injury undiagnosed	AN.34.35	Talus avascular necrosis
Ankle	Unknown	AZZ	Other Ankle Pain/Injury not otherwise specified	AN.90.42
Foot	Muscle injury	FM1	Foot Muscle Strain/Spasm/trigger Points	FO.11.07	Extensor digitorum brevis strain
Foot	Muscle contusion	FH3	Fat pad contusion heel	FO.94.42	Fat pad Syndrome
Foot	Muscle compartment syndrome	FYX	Foot muscle compartment syndrome
Foot	Tendinopathy	FT7	Tibialis posterior tendinopathy	AN.13.28	Tibialis posterior tendinopathy
Foot	Tendinopathy	FT2	Extensor tendon injury in foot	FO.10.28
Foot	Tendinopathy	FT1	Plantar heel pain (fasciitis/strain/calcaneal spur)	FO.13.33	Plantar fasciitis
Foot	Tendinopathy	FTX	Foot Tendon Injuries	FO.10.28
Foot	Tendinopathy	FTT	Tibialis posterior insertional tendinopathy	FO.10.28
Foot	Tendinopathy	FTE	Extensor tendinopathy in foot	FO.10.28
Foot	Tendinopathy	FTM	Mid/distal plantar fasciitis	FO.10.28
Foot	Tendinopathy	FT6	Cuboid Syndrome	FO.52.11	Cuboid subluxation
Foot	Tendon rupture	FR1	Peroneal tendon rupture	AN.15.09	Peroneus tendon rupture
Foot	Tendon rupture	FRP	Plantar fascia rupture	FO.10.09
Foot	Nerve injury	FN1	Morton's neuroma or Joplin's neuritis	FO.21.41	Morton's neuroma / interdigital neuroma
Foot	Nerve injury	FNX	Foot Neurological Injury	FO.22.39	Plantar nerve injury
Foot	Fracture	FF2	Fractured metatarsal(s)	FO.30.13
Foot	Fracture	FFT	Fracture great toe distal phalanx	FO.30.13
Foot	Fracture	FF3	Fractured phalanx (foot)	FO.39.13	Phalyngeal fracture- toes
Foot	Fracture	FFC	Fractured calcaneus	FO.31.13	Calcaneal fracture
Foot	Fracture	FFA	Fractured anterior process calcaneus	FO.30.13
Foot	Fracture	FFZ	Fracture tarsal bone	FO.30.13
Foot	Fracture	FF1	Fracture cuboid	FO.32.13	Cuboid fracture
Foot	Fracture	FFN	Fracture navicular	FO.33.13	Navicular fracture
Foot	Fracture	FFF	Fracture cuneiform	FO.34.13	Cuneiform fracture
Foot	Fracture	FFM	Fracture 1st Metatarsal	FO.35.13	First metatarsal fracture
Foot	Fracture	FFS	Fracture 2nd Metatarsal	FO.30.13
Foot	Fracture	FFI	Fracture 3rd metatarsal	FO.30.13
Foot	Fracture	FF4	Fracture 4th metatarsal	FO.30.13
Foot	Fracture	FF5	Fracture 5th metatarsal shaft	FO.37.13	5th metatarsal fracture/ Jones' fracture
Foot	Fracture	FFB	Avulsion fracture 5th metatarsal base	FO.37.14	Styloid process avulsion fracture
Foot	Fracture	FFX	Fracture two or more metatarsals	FO.30.13
Foot	Fracture	FFH	Fracture great toe	FO.30.13
Foot	Fracture	FFG	Fracture great toe proximal phalanx	FO.30.13
Foot	Fracture	FFU	Complication of fractured foot including non union	FO.30.13
Foot	Bone stress injury	FSC	Stress fracture calcaneus	FO.31.18	Calcaneal stress fracture
Foot	Bone stress injury	FSN	Navicular stress fracture	FO.33.18	Navicular stress fracture
Foot	Bone stress injury	FS2	Stress fracture metatarsal	FO.30.18
Foot	Bone stress injury	FS3	Sesamoiditis/stress fracture	FO.38.33	Sesamoiditis
Foot	Bone stress injury	FS1	Stress reactions/fractures in foot	FO.30.18
Foot	Bone stress injury	FSD	Cuboid stress fracture	FO.32.18	Cuboid stress fracture
Foot	Bone stress injury	FSF	Cuneiform stress fracture	FO.34.18	Cuneiform stress fracture
Foot	Bone stress injury	FSA	First metatarsal stress fracture	FO.30.18
Foot	Bone stress injury	FSS	Second metatarsal stress fracture	FO.30.18
Foot	Bone stress injury	FSI	Third metatarsal stress fracture	FO.30.18
Foot	Bone stress injury	FS4	Fourth metatarsal stress fracture	FO.30.18
Foot	Bone stress injury	FS5	Fifth metatarsal stress fracture	FO.30.18
Foot	Bone stress injury	FSB	Base second metatarsal stress fracture	FO.30.18
Foot	Bone stress injury	FSM	Other metatarsal stress fracture	FO.30.18
Foot	Bone stress injury	FSR	Stress reaction metatarsal/metatarsalgia	FO.90.42	Metatarsalgia
Foot	Bone stress injury	FSP	Sesamoid stress injury	FO.30.18
Foot	Bone stress injury	FST	Sesamoid stress fracture	FO.38.18	Sesmoid stress fracture
Foot	Bone contusion	FJX	Foot bone bruise
Foot	Avascular necrosis	FEN	Non union navicular stress fracture	FO.33.15	Navicular fracture- non-union
Foot	Avascular necrosis	FES	Avascular necrosis sesamoid Great Toe	FO.30.35
Foot	Physis injury	FGT	Traction injury to foot
Foot	Physis injury	FG5	Apophysitis/avulsion fracture base 5th metetarsal	FO.30.14
Foot	Physis injury	FGK	Kohler's disease - navicular osteochondrosis	FO.40.21
Foot	Physis injury	FGF	Freiberg's disease - osteochondrosis of MT head	FO.36.35	Freiberg's infarction
Foot	Cartilage	FCX	Foot Chondral/Osteochondral Lesion	FO.40.21
Foot	Cartilage	FC1	Osteochondrosis of foot	FO.46.37	Osteochondritis / Kohler's disease
Foot	Arthritis	FAS	Subtalar joint arthritis
Foot	Arthritis	FAX	Foot Osteoarthritis	FO.40.34
Foot	Arthritis	FA2	Arthritis of midfoot	FO.42.30	Tarsal-metatarsal hypomobility
Foot	Arthritis	FAH	Arthritis MTP joint great toe/Hallux Rigidus
Foot	Arthritis	FA1	Bunion of great toe MTP joint
Foot	Arthritis	FAT	Arthritis of lesser toes	FO.45.34	Metatarsophalangeal joint osteoarthritis
Foot	Arthritis	FAF	Bunion 5th MTP joint	FO.96.42	5th MTP bunionette
Foot	Synovitis / capsulitis	FQ3	Sinus tarsi syndrome (subtalar jt synovitis)	FO.93.42	Sinus Tarsi Syndrome
Foot	Synovitis / capsulitis	FQ2	Synovitis of MTP joint(s)	FO.40.30
Foot	Synovitis / capsulitis	FQM	Synovitis of midfoot joints	FO.40.30
Foot	Ligament	FL1	Midfoot joint/ligament sprain	FO.55.01	Midfoot sprain
Foot	Ligament	FLL	Interphalangeal ligament disruption (incl Lisfranc)
Foot	Ligament	FLT	Sprained toe/'turf toe'	FO.44.30	Turf toe
Foot	Ligament	FLJ	Foot Joint Sprain
Foot	Ligament	FLF	Spring ligament sprain in foot
Foot	Ligament	FLG	Sprain IP ligament(s) great toe
Foot	Joint sprain	FDX	Foot Dislocation	FO.40.10
Foot	Joint sprain	FDT	Dislocation of midfoot through TMT joints	FO.56.03	Lisfranc injury
Foot	Joint sprain	FD2	Dislocation of great toe MTP jt	FO.53.10	First MTP joint dislocation
Foot	Joint sprain	FDM	Dislocation of lesser toe MTP joint	FO.54.10	2nd, 3, 4, 5th MTP joint disolcation
Foot	Joint sprain	FDP	Dislocation of IP joint of lesser toe	FO.40.10
Foot	Chronic instability	FUX	Foot joint chronic instability
Foot	Contusion/vascular	FV3	Heel bruising/haematoma incl fat pad contusion	FO.42.24	Fat pad contusion
Foot	Contusion/vascular	FV1	Foot contusion/haematoma	FO.60.24	Foot contusion
Foot	Contusion/vascular	FV2	Toenail problem/contusion/haematoma	FO.60.24	Foot contusion
Foot	Contusion/vascular	FVG	Haematoma great toe	FO.60.35
Foot	Contusion/vascular	FVT	Haematoma lesser toes	FO.60.33
Foot	Contusion/vascular	FVN	Nail bed haematoma lesser toes	FO.60.33
Foot	Contusion/vascular	FVX	Other foot soft tissue bruising/haematoma not elsewhere specified	FO.60.24	Foot contusion
Foot	Contusion/vascular	FVXX	Foot Vascular Injuries	FO.70.45
Foot	Laceration	FKI	Complication of foot laceration incl infection	FO.60.75
Foot	Laceration	FKU	Ulceration foot
Foot	Abrasion	FIA	Foot abrasion	FO.60.26	Foot laceration
Foot	Abrasion	FI2	Foot cellulitis/infected ulcer	FO.60.75
Foot	Abrasion	FIN	Skin infection toenail - incl infected ingrown toenail	FO.60.75
Foot	Abrasion	FIH	Blisters heel	FO.60.27
Foot	Abrasion	FIF	Blisters foot	FO.60.27
Foot	Abrasion	FIC	Callous on foot
Foot	Pain without tissue type specified	FPY	Foot muscle trigger points, cramping, spasm	FO.10.08
Foot	Pain without tissue type specified	FPL	Sprain of great toe
Foot	Pain without tissue type specified	FP1	Sprain 1st MTP jt with volar plate rupture
Foot	Pain without tissue type specified	FP2	Synovitis/Impingement/Biomechanical Lesion of Foot	FO.40.30
Foot	Pain without tissue type specified	FP5	Chronic regional pain syndrome foot	FO.90.42	Metatarsalgia
Foot	Unknown	FZ1	Foot pain undiagnosed	FO.90.42	Metatarsalgia
Foot	Unknown	FZZ	Foot Pain/Injury not otherwsie specified	FO.90.42	Metatarsalgia
Foot	Unknown	FZX	Foot Pain/Injury Not otherwise specified	FO.31.33	Heel spur
Multiple	Muscle injury	XMU	Muscle strain upper limb
Multiple	Muscle injury	XML	Muscle strain lower limb
Multiple	Muscle injury	XMS	Muscle strain spine	LS.10.07
Multiple	Muscle injury	XMX	Trigger points/spasm multiple locations	OO.10.08
Multiple	Muscle contusion	XHU	Soft tissue bruising upper limb
Multiple	Muscle contusion	XHL	Soft tissue bruising lower limb
Multiple	Tendinopathy	XT8	Lower Leg Tendon Injuries (see knee or ankle depending on tendon location)
Multiple	Nerve injury	XNS	Spinal injury location unspecified or crossing anatomical boundaries
Multiple	Nerve injury	XNU	Upper limb neurological injury
Multiple	Nerve injury	XNL	Lower limb neurological injury
Multiple	Physis injury	XGX	Other Osteochondrosis not elsewhere specified.
Multiple	Arthritis	XAX	Osteoarthritis Location Unspecified or Crossing Anatomical Boundaries	OO.40.34
Multiple	Arthritis	XAU	Upper limb osteoarthritis	OO.40.34
Multiple	Ligament	XLU	Sprain Location Unspecified
Multiple	Contusion/vascular	XVX	Vascular Injury Location Unspecified or Crossing Anatomical Boundaries	OO.70.45
Multiple	Laceration	XKX	Laceration/Abrasion Location Unspecified or Crossing Anatomical Boundaries	OO.60.25	Skin laceration - other
Multiple	Laceration	XKU	Laceration/abrasion upper limb
Multiple	Laceration	XKL	Laceration/abrasion lower limb
Multiple	Organ trauma	XOD	Drowning
Unknown	Physis injury	ZGT	Traction Apophysitis/Avusion Fracture Apophysitis	OO.30.13
Cardiovascular	Environmental – exercise-related	MCEH	Hypertrophic Cardiomyopathy	CV.01.79	Hypertrophic and other cardiomyopathy
Cardiovascular	Immunological/inflammatory	MCYX	Myocarditis
Cardiovascular	Infection	MCVI	Ischaemic heart disease	CV.02.79	Angina Syndrome
Cardiovascular	Thrombotic/haemorrhagic	MCVD	Deep venous thrombosis	CV.02.78	Deep vein thrombosis
Cardiovascular	Thrombotic/haemorrhagic	MCVA	Athlete's heart	CV.03.83	Athletic Heart Syndrome
Cardiovascular	Thrombotic/haemorrhagic	MCVX	Venous disease	CV.01.78	Cephalic venous insufficiency
Cardiovascular	Thrombotic/haemorrhagic	MCVV	Varicose veins	CV.04.78	Varicose veins - leg
Cardiovascular	Thrombotic/haemorrhagic	MCVS	Subclavian vein/axillary vein thrombosis	CV.06.78	Leg venous insufficiency
Cardiovascular	Thrombotic/haemorrhagic	MCVZ	Other venous disease incl calf/ankle oedema, cause unknown	UO.70.45
Cardiovascular	Degenerative or chronic condition	MCCV	Murmurs/Valvular disease	CV.06.83	Aortic Valve disease
Cardiovascular	Degenerative or chronic condition	MCCP	Peripheral vascular disease	CV.03.78	Leg thrombosis/atherosclerosis
Cardiovascular	Developmental anomaly	MCJA	Bicuspid aortic valve
Cardiovascular	Developmental anomaly	MCJX	Cardiovascular developmental anomaly
Cardiovascular	Multiple	MCXX	Cardiovascular Illness
Cardiovascular	Unknown, or not specified	MCZC	Heart arrhythmia/conduction abnormality	CV.04.83	Arrythmia - Dysrythmia
Cardiovascular	Unknown, or not specified	MCZX	Other cardiovascular disease	CV.01.74	Myocarditis
Dermatological	Allergic	MDAX	Atopic dermatitis
Dermatological	Environmental – non-exercise	MDSS	Sunburn	MO.02.73	Sunburn
Dermatological	Immunological/inflammatory	MDYX	Rash /other dermatological condition	OO.60.27	Callus, corn
Dermatological	Immunological/inflammatory	MDYU	Urticaria	DE.01.71	Allergic reaction - Hives
Dermatological	Immunological/inflammatory	MDYP	Psoriasis	DE.60.74
Dermatological	Immunological/inflammatory	MDYD	Dermatitis	DE.01.74	Contact dermatitis
Dermatological	Infection	MDIX	Skin Infection/Cellulitis/Abcess	DE.06.75	Cellulitis or Folliculitis
Dermatological	Infection	MDIH	Herpes simplex
Dermatological	Infection	MDIN	Skin infection head/face/neck
Dermatological	Infection	MDIE	Skin infection elbow	EL.60.75
Dermatological	Infection	MDIP	Skin infection wrist/hand	MS.07.75	Palm infection
Dermatological	Infection	MDIB	Skin infection pelvis/buttock - incl ischial abscess	LS.75.75
Dermatological	Infection	MDIL	Lymphadenopathy secondary to skin infection	UO.75.75
Dermatological	Infection	MDIZ	Other skin infection not specifically mentioned	DE.02.75	Scabies or 'Pediculosis (lice)
Dermatological	Infection	MDIV	Skin infection - viral (incl warts)	DE.03.75	Herpes gladiatorum or Herpes simplex / genitalis
Dermatological	Infection	MDIW	Wrist and hand warts	DE.01.76	Irregular mole / skin lesion
Dermatological	Infection	MDIS	Feet warts - incl plantar warts	DE.05.75	Warts
Dermatological	Infection	MDIO	Other warts
Dermatological	Infection	MDIF	Skin Infection - fungal	UO.75.75
Dermatological	Infection	MDIG	Fungal infection groin	HI.60.75
Dermatological	Infection	MDIT	Tinea pedis/athlete's foot	DE.01.75	Tinea pedis (athlete's foot), cruris (jock itch) or ringworm
Dermatological	Infection	MDIY	Other fungal infection	UO.90.75
Dermatological	Neoplasm	MDB1	Benign skin lesion	UO.60.76
Dermatological	Neoplasm	MDBXD	Skin Lesion/Tumour thoracic
Dermatological	Neoplasm	MDBXH	Skin Lesion/Tumour head	DE.60.76
Dermatological	Neoplasm	MDBX	Skin Lesion/Tumour	DE.02.76	Skin Neoplasm
Dermatological	Neoplasm	MDBB	Basal cell carcinoma (BCC)	DE.60.76
Dermatological	Neoplasm	MDBS	Squamous cell carcinoma SCC	DE.60.76
Dermatological	Neoplasm	MDBE	Melanoma	DE.60.76
Dermatological	Neoplasm	MDBM	Multiple skin cancers	DE.60.76
Dermatological	Drug-related/poisoning	MDDX	Drug-related skin rash
Dermatological	Unknown, or not specified	MDZX	Other rash not otherwise mentioned or undiagnosed	DE.00.83	Other dermatologic illness / disorder
Dermatological	Unknown, or not specified	MDZW	Dermatological Illness	DE.60.73
Dermatological	Unknown, or not specified	MDZG	Dermatological Illness	DE.60.73
Dental	Infection	MTIP	Periodontitis	DT.02.75	Periodontitis
Dental	Infection	MTIT	Dental caries
Dental	Infection	MTIW	Wisdom tooth
Dental	Degenerative or chronic condition	MTCC	Dental condition
Endocrinological	Allergic	MYAH	Hashimoto's thyroiditis
Endocrinological	Immunological/inflammatory	MYYX	Endocrine Illness
Endocrinological	Immunological/inflammatory	MYYT	Thyroid disorder	EN.07.82	Hyperthyroid
Endocrinological	Immunological/inflammatory	MYYZ	Other endocrine disorder	EN.00.83	Other endocrinologic illness / disorder
Endocrinological	Immunological/inflammatory	MYYF	Chronic Fatigue Syndrome	PS.05.83	Burn-out, fatigue syndrome
Endocrinological	Developmental anomaly	MYJO	Exercise prescription for patient with obesity
Gastrointestinal	Allergic	MGAX	Coeliac disease
Gastrointestinal	Environmental – exercise-related	MGEE	Exercise associated gastritis/reflus	GI.80.72
Gastrointestinal	Environmental – exercise-related	MGED	Runner's diarrhoea	GI.02.75	Runner’s Diarrhea
Gastrointestinal	Immunological/inflammatory	MGYX	Gastritis	GI.03.74	Gastritis
Gastrointestinal	Immunological/inflammatory	MGYU	Gastritis/peptic ulceration - non exercise/NSAID related	GI.02.83	Stomach Ulcer
Gastrointestinal	Immunological/inflammatory	MGYS	Surgical bowel problem	GI.80.46
Gastrointestinal	Immunological/inflammatory	MGYC	Cholecystitis	GI.05.83	Gall Stones
Gastrointestinal	Infection	MGIA	Appendicitis	GI.04.75	Appendicitis
Gastrointestinal	Infection	MGIX	Gastrointestinal infection	GI.05.75	Gastroenteritis
Gastrointestinal	Infection	MGIB	Bacterial gastroenteritis (incl food poinsoning)	GI.80.75
Gastrointestinal	Infection	MGIV	Viral gastroenteritis	GI.80.75
Gastrointestinal	Infection	MGID	Amoebic dysentry
Gastrointestinal	Infection	MGIH	Viral hepatitis (A, B, or C)	GI.07.75	Hepatitis
Gastrointestinal	Infection	MGIZ	Other gastrointestinal infection	GI.03.75	Other Colon Infection
Gastrointestinal	Neoplasm	MGBX	Gastrointestinal neoplasm
Gastrointestinal	Thrombotic/haemorrhagic	MGVM	Haematemesis/malaena/GI bleeding	GI.80.33
Gastrointestinal	Drug-related/poisoning	MGDN	NSAID associated gastritis/peptic ulceration	GI.80.81
Gastrointestinal	Multiple	MGXX	Gastrointestinal Illness	GI.00.83	Other gastrointestinal illness / disorder
Gastrointestinal	Multiple	MGXD	Diarrhoea	GI.01.75	Traveller’s Diarrhea
Genitourinary	Environmental – exercise-related	MUEE	Diet and Exercise associated amennorhoea	MO.80.72
Genitourinary	Immunological/inflammatory	MUYA	Other amenorrhoea	EN.03.82	Amenorrhea / Oligomenorrhea
Genitourinary	Immunological/inflammatory	MUYD	Dysmennorrhoea	EN.04.82	Dysmenorrhea / Menorrhagia
Genitourinary	Infection	MUIT	Urinary Tract Infection	GU.02.75	Urinary Tract Infection
Genitourinary	Infection	MUIS	Sexually transmitted disease	GU.04.75	Sexually Transmitted Disease
Genitourinary	Infection	MUIP	Pyelonephritis	GU.01.75	Pyelonephritis
Genitourinary	Infection	MUIC	Cystitis	GU.03.75	Cystitis
Genitourinary	Infection	MUIE	Epididymitis	GU.05.75	Epididymitis
Genitourinary	Infection	MUIX	Other genitourinary infection	GU.80.75
Genitourinary	Thrombotic/haemorrhagic	MUVH	Haematuria	GU.01.72	Exercise Induced Hematuria
Genitourinary	Developmental anomaly	MUJV	Varicocoele	GU.70.45
Genitourinary	Multiple	MUXX	Genitourinary Illness	GU.02.83	Renal Stone
Genitourinary	Multiple	MUXZ	Other gynaecological illness	EN.02.82	Short luteal Phase / Anovulation
Genitourinary	Unknown, or not specified	MUZZ	Urinary Illness
Genitourinary	Unknown, or not specified	MUZX	Gynaecological consultation	GU.01.83	Polycyctic Ovaries
Genitourinary	Unknown, or not specified	MUZO	OCP Advice
Genitourinary	Unknown, or not specified	MUZP	Pregnancy
Genitourinary	Unknown, or not specified	MUZT	Request for pregnancy test
Hematologic	Environmental – exercise-related	MHEX	Exercise-related iron deficiency
Hematologic	Neoplasm	MHB	Haematological Malignancy	BL.01.76	Hemotologic Neoplasm
Hematologic	Metabolic/nutritional	MHNA	Anaemia	BL.02.77	non-Iron deficiency anemia
Hematologic	Developmental anomaly	MHJX	Sickle cell or thalassaemia
Hematologic	Multiple	MHXX	Haematological Illness and Nutritional Deficiencies	BL.00.83	Other hematologic illness / disorder
Musculoskeletal	Environmental – exercise-related	MRER	Rhabdomyolysis	GU.02.72	Myoglobinuria (Rhabdomyolysis)
Musculoskeletal	Immunological/inflammatory	MRYIL	Sacroiliac Joint Inflammation	HI.40.33
Musculoskeletal	Immunological/inflammatory	MRYX	Rheumatological Illness	MS.01.74	Other Rheumatic illness / disorder
Musculoskeletal	Immunological/inflammatory	MRYG	Gout	MS.02.74	Gout
Musculoskeletal	Immunological/inflammatory	MRYGE	Gout in elbow
Musculoskeletal	Immunological/inflammatory	MRYGP	Gout in hands/fingers
Musculoskeletal	Immunological/inflammatory	MRYGK	Gout in knee
Musculoskeletal	Immunological/inflammatory	MRYGA	Gout in ankle/foot (incl big toe)
Musculoskeletal	Immunological/inflammatory	MRYGZ	Gout in other location not otherwise specified
Musculoskeletal	Immunological/inflammatory	MRYP	Pseudogout	MS.03.74	Pseudogout / Chondrocalcinosis
Musculoskeletal	Immunological/inflammatory	MRYPK	Pseudogout in knee
Musculoskeletal	Immunological/inflammatory	MRYPZ	Pseudogout in other joint/location
Musculoskeletal	Immunological/inflammatory	MRYN	Seronegative arthritis	MS.06.74	Other Seronegative Spondarthropathies
Musculoskeletal	Immunological/inflammatory	MRYA	Anklylosing spondylitis	MS.04.74	Ankylosing spondylitis
Musculoskeletal	Immunological/inflammatory	MRYS	Psoriatic arthritis
Musculoskeletal	Immunological/inflammatory	MRYI	Reiter's syndrome	MS.05.74	Reiter's Syndrome
Musculoskeletal	Immunological/inflammatory	MRYNL	Non specific seronegarive arthritis affecting SIJ
Musculoskeletal	Immunological/inflammatory	MRYNZ	Non specific seronegarive arthritis affecting <4 joints
Musculoskeletal	Immunological/inflammatory	MRYNX	Non specific seronegarive arthritis affecting many joints
Musculoskeletal	Immunological/inflammatory	MRYR	Rheumatoid arthritis	MS.07.74	Rheumatoid Arthritis
Musculoskeletal	Immunological/inflammatory	MRYRZ	Rheumatoid arthritis affecting <4 joints
Musculoskeletal	Immunological/inflammatory	MRYRX	Rheumatoid arthritis affecting many joints
Musculoskeletal	Infection	MRIK	Infected knee jt	KN.40.75
Musculoskeletal	Infection	MRIF	Infected foot joint	MS.01.75	MSK sepsis
Musculoskeletal	Infection	MRIJ	Joint infection - septic arthritis (excl complications of surgery or perforating lacerations)	MS.40.25
Musculoskeletal	Infection	MRIJS	Infected shoulder joint	SH.40.75
Musculoskeletal	Infection	MRIJE	Infected elbow joint	MS.05.75	Joint sepsis
Musculoskeletal	Infection	MRIJW	Infected wrist, hand, finger, thumb joint	MS.40.75
Musculoskeletal	Infection	MRIJH	Infected hip joint	MS.40.75
Musculoskeletal	Infection	MRIP	Infected pubic symphysis	LS.30.75
Musculoskeletal	Infection	MRIJA	Infected ankle joint	MS.40.75
Musculoskeletal	Infection	MRIBT	Infection of bone - osteomyelitis thigh	TH.30.75
Musculoskeletal	Infection	MRIB	Infection of bone - osteomyelitis	MS.02.75	Osteomyelitis
Musculoskeletal	Infection	MRIBL	Septic discitis - osteomyelitis of the spine
Musculoskeletal	Neoplasm	MRBXS	Tumour shoulder	UO.93.76	Upper extremity neoplasm
Musculoskeletal	Neoplasm	MRBXU	Tumour upper arm	UO.94.76	Lower extremity neoplasm
Musculoskeletal	Neoplasm	MRBXE	Tumour elbow	EL.0.76
Musculoskeletal	Neoplasm	MRBXR	tumour forearm	FA.0.76
Musculoskeletal	Neoplasm	MRBXW	Tumour wrist/hand	WR.20.41	Wrist neuroma
Musculoskeletal	Neoplasm	MRBXN	Tumour neck	UO.92.76	Neck Neoplasm
Musculoskeletal	Neoplasm	MRBXD	Tumour thoracic spine/chest wall	TS.20.41	Thoracic neuroma
Musculoskeletal	Neoplasm	MRBXL	Tumour lumbar spine	UO.97.76	Lumbar neoplasm
Musculoskeletal	Neoplasm	MRBXB	Tumour lumbar buttock	LS.0.76
Musculoskeletal	Neoplasm	MRBXG	Tumour groin and Hip	HI.0.76
Musculoskeletal	Neoplasm	MRBXT	Tumour thigh	TH.33.32	Femoral exostosis
Musculoskeletal	Neoplasm	MRBXK	Tumour knee	KN.21.41	Saphenous neuroma
Musculoskeletal	Neoplasm	MRBXQ	Tumour lower leg	MS.02.83	Exostosis
Musculoskeletal	Neoplasm	MRBXA	Tumour ankle	FO.0.76
Musculoskeletal	Neoplasm	MRBXF	Tumour foot	FO.0.76
Musculoskeletal	Neoplasm	MRBXX	Other tumour not otherwise mentioned	EN.02.76	Pituitary Neoplasm
Musculoskeletal	Degenerative or chronic condition	MRJHX	Hypo or hyper - mobility of joints
Musculoskeletal	Degenerative or chronic condition	MRJCL	Congenital abnormality Lumbar Spine	LS.30.80
Musculoskeletal	Degenerative or chronic condition	MRJB	Spina Bifida
Musculoskeletal	Degenerative or chronic condition	MRJLL	Lumbarisation of S1
Musculoskeletal	Degenerative or chronic condition	MRJSL	Sacralisation of L5
Musculoskeletal	Degenerative or chronic condition	MRJXS	Shoulder Structural Abnormaility
Musculoskeletal	Degenerative or chronic condition	MRJXK	Structural Abnormality of knee	KN.36.42	Patella alta
Musculoskeletal	Degenerative or chronic condition	MRJCK	Congenital cartilage abnormality of knee	KN.40.80
Musculoskeletal	Degenerative or chronic condition	MRJXQ	Structural Abnormality of Lower leg
Musculoskeletal	Degenerative or chronic condition	MRJMQ	Muscle abnormality of lower leg
Musculoskeletal	Degenerative or chronic condition	MRJXF	Structural Abnormality of Foot	FO.38.42	Bipartite sesmoids
Musculoskeletal	Degenerative or chronic condition	MRCO	Osteoarthritis - non-traumatic	OO.40.34
Musculoskeletal	Developmental anomaly	MRJTF	Claw toes
Musculoskeletal	Developmental anomaly	MRJHF	Hammer toes
Musculoskeletal	Developmental anomaly	MRJO	Generalised hypomobility of joints	MS.40.38
Musculoskeletal	Developmental anomaly	MRJH	Generalised hypermobility of joints
Musculoskeletal	Developmental anomaly	MRJZD	Thoracic Spine Structural Abnormaility
Musculoskeletal	Developmental anomaly	MRJSD	Thoracic scoliosis	TS.31.38	Scoliosis or Kyphosis
Musculoskeletal	Developmental anomaly	MRJYD	Thoracic kyphosis
Musculoskeletal	Developmental anomaly	MRJL	Lumbosacral Spine Structural Abnormality
Musculoskeletal	Developmental anomaly	MRJBL	Lumbar Scoliosis
Musculoskeletal	Developmental anomaly	MRJEC	Chest Structural Abnormaility
Musculoskeletal	Developmental anomaly	MRJVW	Radioulnar variance
Musculoskeletal	Developmental anomaly	MRJ2G	Structural Abnormaility of Hip/Groin
Musculoskeletal	Developmental anomaly	MRJ1G	Congenital abnormality of hip joint	HI.40.80
Musculoskeletal	Developmental anomaly	MRJDG	Congenital dislocation of hip	HI.40.80
Musculoskeletal	Developmental anomaly	MRJPK	Bi or multipartite patella	KN.35.42	Bipartite or multipartite patella
Musculoskeletal	Developmental anomaly	MRJKK	Discoid lateral meniscus	KN.40.21	Loose body of knee
Musculoskeletal	Developmental anomaly	MRJIQ	Accessory soleus muscle (excl inj to that muscle)
Musculoskeletal	Developmental anomaly	MRJUF	Tarsal Coalition of foot	FO.41.30	Tarsal Coalition
Musculoskeletal	Developmental anomaly	MRJT	Talonavicular Coalition
Musculoskeletal	Developmental anomaly	MRJCF	Calcaneocuboid coalition
Musculoskeletal	Developmental anomaly	MRJC	Calcaneonavicular coalition
Musculoskeletal	Developmental anomaly	MRJFF	Accessory bone foot	FO.33.23	Accessory navicular
Musculoskeletal	Developmental anomaly	MRJA	Exercise prescription for patient with arthritis	OO.40.72
Musculoskeletal	Unknown, or not specified	MRZF	Fibromyalgia/multiple sore muscle areas	MS.00.82	Fibromyalgia
Musculoskeletal	Unknown, or not specified	MRZX	Rheumatological disease other/undiagnosed	MS.03.82	Ehlers-Danlos Syndrome
Musculoskeletal	Unknown, or not specified	MRZK	Inflammatory arthritis of knee	KN.40.33
Musculoskeletal	Unknown, or not specified	MRZP	Pregnancy associated musculosketal injury
Neurological	Environmental – exercise-related	MNEM	Exercise related migraine	HE.20.72
Neurological	Environmental – exercise-related	MNED	Autonomic dysreflexia
Neurological	Immunological/inflammatory	MNYM	Migraine	NS.05.83	Migraine
Neurological	Immunological/inflammatory	MNEH	Exercise related headache	HE.20.72
Neurological	Infection	MNIB	Brachial neuritis	NS.01.74	Idiopathic brachial neuritis
Neurological	Developmental anomaly	MNJE	Epilepsy	NS.06.83	Convulsive disorder / epilepsy
Neurological	Developmental anomaly	MNJC	Cerebral palsy
Neurological	Multiple	MNXZ	Neurological lesion Location Unspecified or Crossing Anatomical Boundaries	NS.90.42
Neurological	Multiple	MNXX	Neurological Illness
Neurological	Unknown, or not specified	MNZH	Headaches	NS.03.83	Headache
Neurological	Unknown, or not specified	MNZC	Cluster headaches
Neurological	Unknown, or not specified	MNZZ	Headache not otherwise specified	HE.20.42
Neurological	Unknown, or not specified	MNZX	Other neurological problem	MS.01.83	Regional Pain Syndrome
Neurological	Unknown, or not specified	MNZM	Generalised tight muscles/spasticity
Ophthalmological	Allergic	MOAC	Allergic conjunctivitis
Ophthalmological	Infection	MOIC	Infective conjunctivitis
Ophthalmological	Infection	MOIS	Sty (eyelash)
Ophthalmological	Unknown, or not specified	MOZ1	Opthalmological Illness (excl trauma)	OP.01.75	Stye
Otological	Environmental – exercise-related	MEEX	Swimmer's ear
Otological	Infection	MEIR	Respiratory infection upper (incl. tonsillitis)	RE.01.75	Upper Respiratory Tract Infection - Viral
Otological	Infection	MEIX	Ear infection	OT.80.75
Otological	Infection	MEIE	Otitis externa
Otological	Infection	MEIM	Middle ear infection	OT.80.75
Psychiatric/psychological	Environmental – exercise-related	MSEX	Overexercising disorder
Psychiatric/psychological	Environmental – exercise-related	MSEE	Exercise addiction	PS.0.72
Psychiatric/psychological	Environmental – exercise-related	MSEF	Female athlete triad
Psychiatric/psychological	Environmental – non-exercise	MSSA	Anxiety/panic disorder	PS.02.83	Anxiety
Psychiatric/psychological	Metabolic/nutritional	MSNA	Anorexia nervosa	PS.01.77	Anorexia nervosa / bulemia
Psychiatric/psychological	Metabolic/nutritional	MSNB	Bulimia nervosa
Psychiatric/psychological	Metabolic/nutritional	MSNM	RED-S (Relative Energy Deficiency in Sport)
Psychiatric/psychological	Multiple	MSX6	Psychological/psychiatric
Psychiatric/psychological	Multiple	MSXD	Depression	PS.01.83	Depression /bipolar disorder
Psychiatric/psychological	Unknown, or not specified	MSZX	Other psychological/psychiatric disorder not otherwise specified	PS.00.83	Other psychiatric illness / disorder
Respiratory	Allergic	MPA3	Asthma/allergy/hay fever/respiratory	GI.07.71	Allergy Syndrome
Respiratory	Allergic	MPAL	Allergy - rhinitis/sinusitis/hayfever	HE.07.75
Respiratory	Allergic	MPAA	Asthma - allergic	RE.0.71
Respiratory	Environmental – exercise-related	MPEE	Asthma - exericse induced only	RE.01.74	Exercise Induced Asthma (EIA/EIB)
Respiratory	Environmental – non-exercise	MPSA	Respiratory symptoms from air pollution
Respiratory	Immunological/inflammatory	MPYS	Pulmonary sarcoidosis
Respiratory	Infection	MPIP	Pneumonia/bronchitis/lower RTI	RE.06.75	Pneumonia
Respiratory	Infection	MPIS	Sinusitis
Respiratory	Infection	MPIG	Pharyngitis	RE.04.75	Pharyngitis
Respiratory	Infection	MPI1	Respiratory infection	RE.02.75	Tonsilitis
Respiratory	Infection	MPIT	Tonsillitis	RE.02.75	Tonsilitis
Respiratory	Infection	MPIX	Other upper resp tract infection	RE.80.75
Respiratory	Infection	MPIB	Bronchitis
Respiratory	Infection	MPIL	Other lower respiratory tract infection	RE.80.75
Respiratory	Infection	MPIH	Sinus headache
Respiratory	Neoplasm	MPBC	Respiratory neoplasm
Respiratory	Thrombotic/haemorrhagic	MPVE	Pulmonary embolus
Respiratory	Degenerative or chronic condition	MPCX	Chronic airflow limitation	RE.03.83	COPD- Chronic Obstrucitve Pulmonary Disease
Respiratory	Developmental anomaly	MPJC	Cystic Fibrosis	RE.02.83	Cystic fibrosis
Respiratory	Multiple	MPXX	Respiratory Disease
Respiratory	Unknown, or not specified	MPZT	Nose /throat illness /condition	HE.92.00	Mouth /throat disorder
Respiratory	Unknown, or not specified	MPZX	Other respiratory illness not otherwise specified	RE.00.83	Other respiratory illness / disorder
Thermoregulatory	Environmental – exercise-related	MAE1	Heat Illness	TR.03.72
Thermoregulatory	Environmental – exercise-related	MAEO	Hypothermia	EV.01.72	Hypothermia
Thermoregulatory	Environmental – exercise-related	MAES	Hyperthermia/heat stroke	TR.02.72
Multiple systems or not otherwise specified	Environmental – exercise-related	MXEB	Barotrauma	HE.83.46	Tinnitus / barotrauma
Multiple systems or not otherwise specified	Environmental – exercise-related	MXED	Decompression sickness	MO.04.72	Decompression sickness
Multiple systems or not otherwise specified	Environmental – non-exercise	MXSE	Environmental Illness	DE.01.73	Burn
Multiple systems or not otherwise specified	Infection	MXIG	Glandular Fever	MO.03.75	Mononucleosis (EBV) / CMV
Multiple systems or not otherwise specified	Infection	MXI5	Virus proven by serology	NS.02.75	Herpes Zoster / Shingles
Multiple systems or not otherwise specified	Infection	MXI8	Infection, other	DE.09.75	Methicillin Resistant Staphylococcus Aureus (MRSA)
Multiple systems or not otherwise specified	Infection	MXIX	Infection	UO.90.75
Multiple systems or not otherwise specified	Infection	MXIV	Chicken Pox
Multiple systems or not otherwise specified	Neoplasm	MXBCH	Tumour head	UO.91.76	Head neoplasm
Multiple systems or not otherwise specified	Metabolic/nutritional	MXN7	Nutritional (including vitamin deficiency)	HE.91.00	Other Ear Injury
Multiple systems or not otherwise specified	Metabolic/nutritional	MXN1	Tired athlete undiagnosed	PS.04.83	Overtraining syndrome
Multiple systems or not otherwise specified	Drug-related/poisoning	MXDD	Drug use/overdose/poisoning	EN.02.77	Anabolic Steroid Related
Not specific	Multiple	MZXX	Medical Illness Undiagnosed/Other	DE.04.83	Systemic disease of nail
Not specific	Unknown, or not specified	MCZ1	Cardiac preparticipation screening
Not specific	Unknown, or not specified	MZZ1	Consultation
Not specific	Unknown, or not specified	MZZ2	Screening
Not specific	Unknown, or not specified	MZZ6	Education
Not specific	Unknown, or not specified	MZZX	Other medical illness	EN.01.76	Ovarian Cyst
Not specific	Unknown, or not specified	MZZO	Obesity	EN.01.79	Obesity / overweight
Not specific	Unknown, or not specified	MZZP	Paperwork
Not specific	Unknown, or not specified	MZZC	Medical certificate
Not specific	Unknown, or not specified	MZZZ	Referral
Not specific	Unknown, or not specified	MZZR	Prescription repeat
Not specific	Unknown, or not specified	MZZ3	Preparation for overseas travel - advice immunisations
Not specific	Unknown, or not specified	MZZE	Advice on equiptment/other aids e.g. appropriate footwear.

## Sheet: IOC Consensus Categories
Table # Recommended categories of body regions and areas for injuries.
Region	Body area	OSIICS	SMDCS	Notes
Head and neck	Head	H	HE	Includes facial, brain (concussion), eyes, ears, teeth
	Neck	N	NE	Cervical spine, throat
Upper limb	Shoulder	S	SH	Includes clavicle, scapula, rotator cuff, biceps tendon origin
	Upper arm	U	AR
	Elbow	E	EL	Ligaments, insertional biceps and triceps tendon
	Forearm	R	FA	Includes non-articular radius & ulna injuries
	Wrist	W	WR	Carpus
	Hand	P	HA	Includes finger, thumb
Trunk	Chest	C	CH	Sternum, ribs, chest organs
	Thoracic spine	D	TS	Thoracic spine, costovertebral joints
	Lumbosacral	L	LS	Includes lumbar spine, sacroiliac joints, sacrum, coccyx, buttock
	Abdomen	O	AB	Below diaphragm and above inguinal canal, includes abdominal organs
Lower limb	Hip/groin	G	HI	Hip and anterior musculoskeletal structures (e.g. pubic symphysis, proximal adductors, iliopsoas)27
	Thigh	T	TH	Includes femur, hamstrings (including ischial tuberosity), quadriceps, mid-distal adductors
	Knee	K	KN	Includes patella, patellar tendon, pes anserinus
	Lower leg	Q	LE	Includes non-articular tibia & fibular injuries, calf and Achilles tendon
	Ankle	A	AN	Includes syndesmosis, talocrural and subtalar joints
	Foot	F	FO	Includes toes, calcaneus, plantar fascia
Unspecified	Region unspecified	Z	OO
Multiple regions	Single injury crossing two or more regions	X	OO
Table # Recommended categories of tissue and pathology types for injuries.
Tissue	Pathology type	OSIICS	SMDCS	Notes
Muscle/tendon	Muscle injury	M	10.07-10.09	Includes strain, tear, rupture, intramuscular tendon
	Muscle contusion	H	10.24
	Muscle compartment syndrome	Y	10.36
	Tendinopathy	T	10.28-10.29	Includes paratenon, related bursa, fasciopathy, partial tear, tendon subluxation (all non-rupture), enthesopathy
	Tendon rupture	R	10.09	Complete/full thickness injury; Partial tendon injuries considered to be tendinopathy
Nervous	Brain & spinal cord injury	N	20.4	Includes concussion and all forms of brain injury, and spinal cord
	Peripheral nerve Injury	N	20.39, 20.41-20.42	Includes neuroma
Bone	Fracture	F	30.13-30.16, 30.19	Traumatic, includes avulsion fracture, teeth
	Bone stress injury	S	30.18, 30.32	Includes bone marrow edema, stress fracture, periostitis
	Bone contusion	J	30.24	Acute bony traumatic injury without fracture. Osteochondral injuries are considered ‘Joint cartilage’
	Avascular necrosis	E	30.35
	Physis injury	G	30.2	Includes apophysis
Cartilage/synovium/bursa	Cartilage	C	40.17, 40.21, 40.37	Includes meniscal, labral injuries and articular cartilage, osteochondral injuries
	Arthritis	A	40.33-40.34	Post traumatic osteoarthritis
	Synovitis / capsulitis	Q	40.22, 40.34	Includes joint impingement
	Bursitis	B	40.31	Includes calcific bursitis, traumatic bursitis
Ligament/joint capsule	Joint sprain (ligament tear or acute instability episode)	L or D	50.01-50.11	Includes partial and complete tears plus injuries to non-specific ligaments and joint capsule; includes joint dislocations / subluxations
	Chronic instability	U	50.12
Superficial tissues/skin	Contusion (superficial)	V	60.24	Contusion, bruise, vascular damage
	Laceration	K	60.25
	Abrasion	I	60.26-60.27
Vessels	Vascular trauma	V	70.45
Stump	Stump injury	W	91.44	In amputees
Internal organs	Organ trauma	O	80.46	Includes trauma to any organ (excluding concussion), drowning, relevant for all specialized organs not mentioned elsewhere (lungs, abdominal and pelvic organs, thyroid, breast)
Non-specific	Injury without tissue type specified	P or Z	0.0, 0.23, 0.38, 0.42	No specific tissue pathology diagnosed
Table # Recommended categories of organ system/region for illnesses.
Organ system/Region	ICD-11	OSIICS	SMDCS	Notes
Cardiovascular	11	MC	CV
Dermatological	14	MD	DE
Dental	(13)	MT	DT
Endocrinological	5	MY	EN
Gastrointestinal	(13)	MG	GI
Genitourinary	16	MU	GU	Includes renal, obstetrical, gynecological
Hematologic	3	MH	BL
Musculoskeletal	15	MR	MS	Includes rheumatological conditions
Neurological	8	MN	NS
Opthalmological	9	MO	OP
Otological	10	ME	OT	Ear only
Psychiatric/psychological	6	MS	PS
Respiratory	12	MP	RE	Includes nose and throat
Thermoregulatory	(22)	MA	TR
Multiple systems		MX	MO
Unknown or not specified		MZ	UO
Table # Recommended categories for etiology of illnesses.
Etiology	ICD-11	OSIICS	SMDCS	Notes
Allergic	(22)	MxA	71
Environmental–exercise-related	(23)	MxE	72	Heat illness, hypothermia, hyponatraemia, dehydration
Environmental – non-exercise	(22/7)	MxS	73	Includes sleep/wake, sunburn
Immunological/inflammatory	(4)	MxY	74
Infection	1	MxI	75	Viral, bacterial, parasitic
Neoplasm	2	MxB	76
Metabolic/nutritional	5	MxN	77
Thrombotic/haemorrhagic	(11/03)	MxV	78
Degenerative or chronic condition	-	MxC	79	Chronic acquired conditions
Developmental anomaly	20	MxJ	80	Includes congenital conditions
Drug-related/poisoning	22	MxD	81	Includes pharma, illicit
Multiple		MxX	82
Unknown, or not specified		MxZ	83
